# Supplementary material
Source: publisher figshare collection journal article supplement (https://acs.figshare.com/ndownloader/files/21623361)

## SUPPORTING INFORMATION

### **Copper-Catalyzed Intermolecular Difunctionalization of Styrenes with Thiosulfonates and Arylboronic Acids via a Radical Relay Pathway**

Qingjin Liang<sup>†,‡</sup> Patrick J. Walsh<sup>§</sup> and Tiezheng Jia<sup>\*,‡</sup>

<sup>†</sup>School of Chemistry and Chemical Engineering, Harbin Institute of Technology, Harbin 150001, P. R. China

<sup>‡</sup>Department of Chemistry, Southern University of Science and Technology, Shenzhen Guangdong, 518055, P. R. China

<sup>§</sup>Roy and Diana Vagelos Laboratories, Penn/Merck Laboratory for High-Throughput Experimentation, Department of Chemistry, University of Pennsylvania, 231 South 34th Street, Philadelphia, Pennsylvania 19104-6323, United States.

E-mail: [jjatz@sustech.edu.cn](mailto:jjatz@sustech.edu.cn)

#### **Table of Contents**

|                                                                                                                                                                                                |            |
|------------------------------------------------------------------------------------------------------------------------------------------------------------------------------------------------|------------|
| <b>1. General Information.....</b>                                                                                                                                                             | <b>S2</b>  |
| <b>2. Preparation of Thiosulfonates.....</b>                                                                                                                                                   | <b>S2</b>  |
| <b>3. Procedure and Characterization of Copper-Catalyzed Intermolecular<br/>Difunctionalization of Styrenes with Thiosulfonates and Arylboronic Acids via<br/>a Radical Relay Pathway.....</b> | <b>S2</b>  |
| <b>4. Mechanism Study.....</b>                                                                                                                                                                 | <b>S23</b> |
| <b>5. References.....</b>                                                                                                                                                                      | <b>S27</b> |
| <b>6. NMR Spectra.....</b>                                                                                                                                                                     | <b>S28</b> |

## 1. General Information

All reactions were carried out under dry argon. Anhydrous acetone was purchased from Changtai Chemical Technology and *N,N*-dimethylformamide (DMF) was purchased from J&K Chemicals. Solvents were directly used without further purification. Unless otherwise stated, reagents were commercially available and used as purchased without further purification. Chemicals were purchased from J&K Chemicals, Adamas-beta, Macklin Reagent, Energy Chemicals, Aladdin, JiuDing Chemicals or Bide Pharmatech Ltd. The progress of the reactions was monitored by thin-layer chromatography using Whatman Partisil K6F 250  $\mu\text{m}$  precoated 60 Å silica gel plates and visualized by short-wave ultraviolet light as well as by treatment with iodine. Flash chromatography was performed with silica gel (300–400 mesh). The NMR spectra were obtained using a Bruker 400 MHz Fourier-transform NMR spectrometer. Chemical shifts are reported in units of parts per million (ppm) downfield from tetramethylsilane (TMS), and all coupling constants are reported in hertz. The infrared spectra were taken with KBr plates with a Perkin-Elmer Spectrum Vertex 80 Series spectrometer. High resolution mass spectrometry (HRMS) data were obtained on a Bruker Apex IV RTMS using electrospray ionization (ESI) in positive mode. Melting points were determined on a Mel-Temp melting point apparatus and were uncorrected. Ultraviolet-Visible (UV) spectra were detected by Hitachi dual-beam UH5300. Electron Paramagnetic Resonance (EPR) spectra were recorded on a Bruker ELEXSYS II E 500 EPR spectrometer.

**2. Preparation of Thiosulfonates:** Thiosulfonates were prepared according to the literature procedures.<sup>1</sup>

## 3. Procedure and Characterization of Copper-Catalyzed Intermolecular Difunctionalization of Styrenes with Thiosulfonates and Aryboronic Acids via a Radical Relay Pathway

**1) General Procedure for Catalysis:** To an oven-dried microwave vial equipped with a stir bar was added *S*-methyl-4-methylbenzenesulfonothioate (**2a**) (40.4 mg, 0.20 mmol), phenylboronic acid (**3a**) (30.5 mg, 0.25 mmol),  $\text{KHCO}_3$  (25.0 mg, 0.25 mmol), CuI (1.9 mg, 10 mol %), 4,4'-di-*tert*-butyl-2,2'-bipyridine (dtbbpy) (4.0 mg, 15 mol %) under argon an atmosphere in a glove box. A mix solvent of acetone (0.6 mL) and DMF (0.1 mL) was added to the vial by syringe. The microwave vial was sealed with a cap and removed from the glove box. Then, styrene (**1a**) (11.6  $\mu\text{L}$ , 0.10 mmol) and *tert*-butyl benzoperoxoate ( $\text{BzOO}^t\text{Bu}$ ) (57.1  $\mu\text{L}$ , 0.30 mmol) were added by syringe under an argon atmosphere. The reaction mixture was heated to 40 °C in an oil bath and stirred for 12 h. Upon completion of the reaction, the sealed vial was cooled to room temperature, and opened to air. The reaction mixture was passed through a short pad of silica gel. The pad was then rinsed with EtOAc (10 mL). The resulting solution was subjected to reduced pressure to remove the volatile materials. The residue was purified by flash chromatography, as outlined below, to afford the pure product.

## 2) Optimization Reaction Condition

**Table S1.** Initial optimization of the solvent<sup>a</sup>

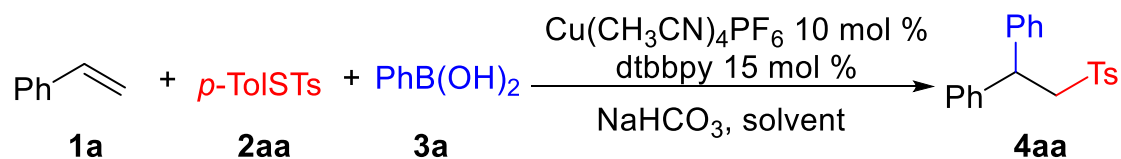

| entry           | solvent | assay yield <sup>b</sup> /% |
|-----------------|---------|-----------------------------|
| 1               | DMA     | 15                          |
| 2               | DMF     | 29                          |
| 3               | DMSO    | 34                          |
| 4               | NMP     | trace                       |
| 5               | MeOH    | 14                          |
| 6               | EtOH    | 7                           |
| 7               | MeCN    | 5                           |
| 8               | Toluene | N.P                         |
| 9 <sup>c</sup>  | DMSO    | 40                          |
| 10 <sup>d</sup> | DMSO    | 44                          |

<sup>a</sup>Reaction conditions: **2aa** (0.1 mmol), **1a** (1.5 equiv), **3a** (2.0 equiv., NaHCO<sub>3</sub> (2.0 equiv), BzOO<sup>t</sup>Bu (2.0 equiv), Cu(CH<sub>3</sub>CN)<sub>4</sub>PF<sub>6</sub> (10 mol %), dtbbpy (15 mol %), solvent (1.0 mL), R.T. for 12 h. <sup>b</sup>Assay yield determined by <sup>1</sup>H NMR analysis of the crude reaction mixtures using 0.1 mmol CH<sub>2</sub>Br<sub>2</sub> (7.0 μL) as internal standard. <sup>c</sup>Cu(OTf)<sub>2</sub> instead of Cu(CH<sub>3</sub>CN)<sub>4</sub>PF<sub>6</sub>. <sup>d</sup>Cu(OTf)<sub>2</sub> instead of Cu(CH<sub>3</sub>CN)<sub>4</sub>PF<sub>6</sub>, KHCO<sub>3</sub> instead of NaHCO<sub>3</sub>, 40 °C.

**Table S2.** Optimization of the ligand<sup>a</sup>

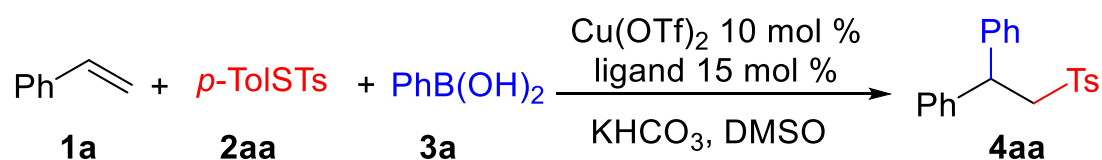

| entry | ligand     | assay yield/% <sup>b</sup> |
|-------|------------|----------------------------|
| 1     | <b>L1</b>  | 44                         |
| 2     | <b>L2</b>  | 40                         |
| 3     | <b>L3</b>  | 34                         |
| 4     | <b>L4</b>  | 22                         |
| 5     | <b>L5</b>  | N.P                        |
| 6     | <b>L6</b>  | N.P                        |
| 7     | <b>L7</b>  | N.P                        |
| 8     | <b>L8</b>  | 4                          |
| 9     | <b>L9</b>  | 4                          |
| 10    | <b>L10</b> | 4                          |
| 11    | <b>L11</b> | N.P                        |

<sup>a</sup>Reaction conditions: **1a** (0.1 mmol), **2aa** (1.5 equiv), **3a** (2.0 equiv), KHCO<sub>3</sub> (2.0 equiv), BzOO<sup>t</sup>Bu (2.0 equiv), Cu(OTf)<sub>2</sub> (10 mol %), ligand (15 mol %), DMSO (1.0 mL), 40 °C for 12 h. <sup>b</sup>Assay yield determined by <sup>1</sup>H NMR analysis of the crude reaction mixtures using 0.1 mmol CH<sub>2</sub>Br<sub>2</sub> (7.0 μL) as internal standard.

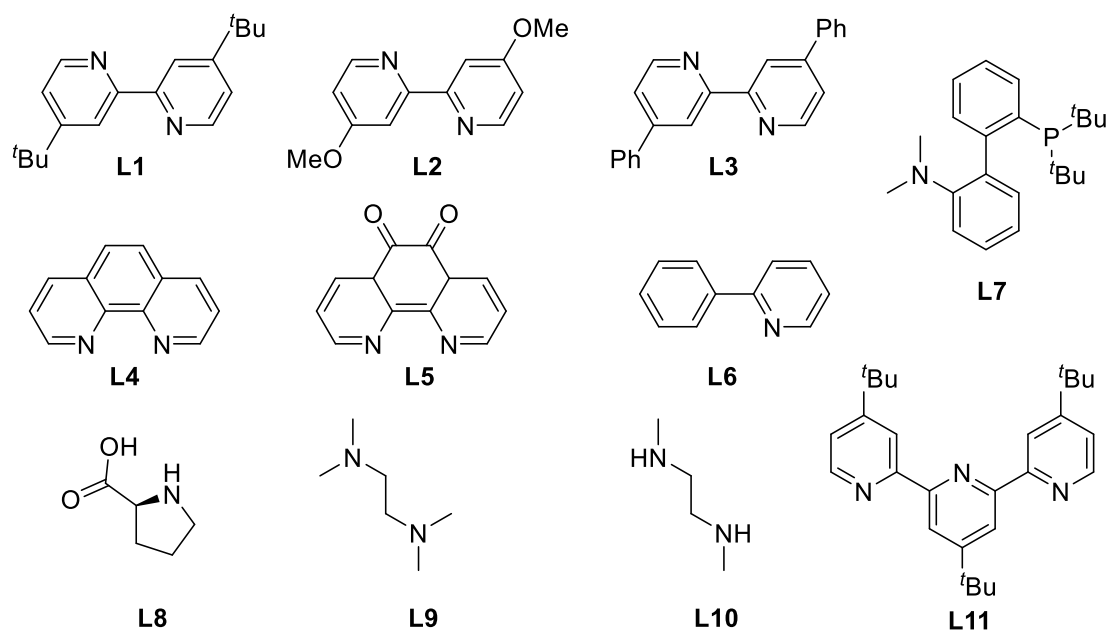

**Table S3.** Optimization of the leaving group<sup>a</sup>

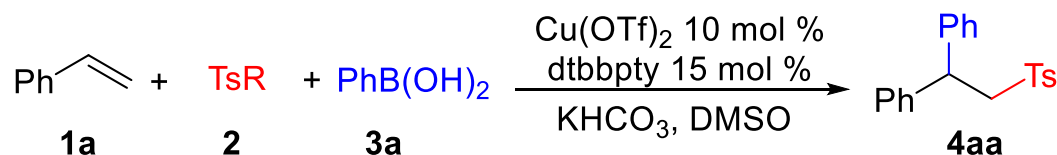

| entry          | <b>2</b>         | assay yield/% <sup>b</sup> |
|----------------|------------------|----------------------------|
| 1              | <i>p</i> -TolSTs | 44                         |
| 2              | 4-FPhTs          | 42                         |
| 3              | TsSMe            | 46                         |
| 4 <sup>c</sup> | TsCl             | N.P                        |
| 5              | TsNa             | N.P                        |

<sup>a</sup>Reaction conditions: **1a** (0.1 mmol), **2** (1.5 equiv), **3a** (2.0 equiv), KHCO<sub>3</sub> (2.0 equiv), BzOO<sup>t</sup>Bu (2.0 equiv), Cu(OTf)<sub>2</sub> (10 mol %), dtbbpy (15 mol %), DMSO (1.0 mL), 40 °C for 12 h. <sup>b</sup>Assay yield determined by <sup>1</sup>H NMR analysis of the crude reaction mixtures using 0.1 mmol CH<sub>2</sub>Br<sub>2</sub> (7.0 μL) as internal standard. <sup>c</sup>Ag<sub>2</sub>CO<sub>3</sub> (2 equiv) was added.

**Table S4.** Optimization of the oxidant<sup>a</sup>

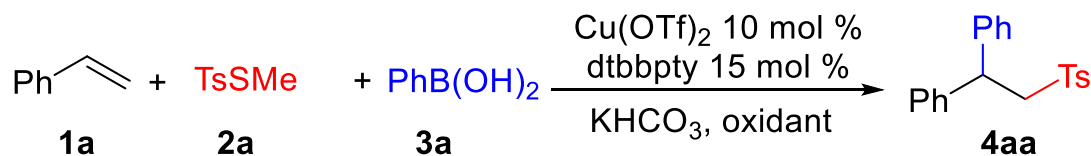

| entry | oxidant                                      | assay yield/% <sup>b</sup> |
|-------|----------------------------------------------|----------------------------|
| 1     | BzOO <sup>t</sup> Bu                         | 46                         |
| 2     | TBHP (70% in H <sub>2</sub> O)               | 38                         |
| 3     | TBHP (5.5 M in decane)                       | 36                         |
| 4     | DTBP                                         | N.P                        |
| 5     | K <sub>2</sub> S <sub>2</sub> O <sub>8</sub> | 9                          |
| 6     | PhI(OAc) <sub>2</sub>                        | N.P                        |
| 7     | O <sub>2</sub>                               | N.P                        |

<sup>a</sup>Reaction conditions: **1a** (0.1 mmol), **2a** (1.5 equiv), **3a** (2.0 equiv), KHCO<sub>3</sub> (2.0 equiv), oxidant (2.0 equiv), Cu(OTf)<sub>2</sub> (10 mol %), dtbbpy (15 mol %), DMSO (1.0 mL), 40 °C for 12 h. <sup>b</sup>Assay yield determined by <sup>1</sup>H NMR analysis of the crude reaction mixtures using 0.1 mmol CH<sub>2</sub>Br<sub>2</sub> (7.0 μL) as internal standard. DTBP: Di-*tert*-Butyl Peroxide.

**Table S5.** Second optimization of the solvent<sup>a</sup>

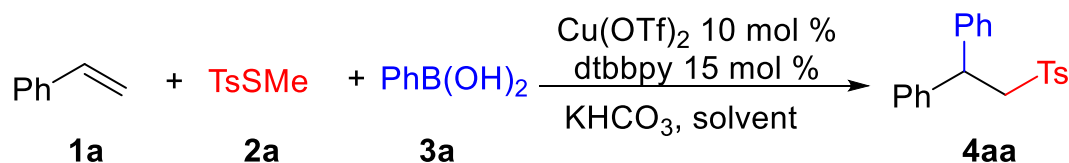

| entry          | solvent     | assay yield/% <sup>b</sup> |
|----------------|-------------|----------------------------|
| 1              | 1,4-Dioxane | trace                      |
| 2              | IPA         | 20                         |
| 3              | acetone     | 40                         |
| 4 <sup>c</sup> | acetone     | 48                         |

<sup>a</sup>Reaction conditions: **1a** (0.1 mmol), **2a** (2.0 equiv), **3a** (2.0 equiv), Na<sub>2</sub>CO<sub>3</sub> (2.0 equiv), BzOO<sup>t</sup>Bu (2.0 equiv), Cu(OTf)<sub>2</sub> (10 mol %), dtbbpy (15 mol %), solvent (1.0 mL), 40 °C for 12 h. <sup>b</sup>Assay yield determined by <sup>1</sup>H NMR analysis of the crude reaction mixtures using 0.1 mmol CH<sub>2</sub>Br<sub>2</sub> (7.0 μL) as internal standard. <sup>c</sup>50 °C.

**Table S6.** Optimization of the copper catalyst<sup>a</sup>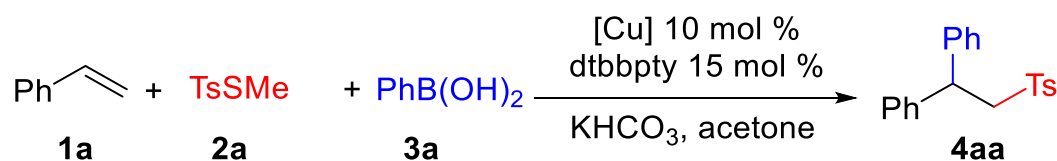

| entry | copper catalyst                                        | assay yield/% <sup>b</sup> |
|-------|--------------------------------------------------------|----------------------------|
| 1     | Cu(CH <sub>3</sub> CN) <sub>4</sub> PF <sub>6</sub>    | 40                         |
| 2     | Cu(CH <sub>3</sub> CN) <sub>4</sub> BF <sub>4</sub>    | 44                         |
| 3     | Cu(CF <sub>3</sub> COO) <sub>2</sub> ·H <sub>2</sub> O | 44                         |
| 4     | Cu <sub>2</sub> S                                      | 50                         |
| 5     | CuCl                                                   | 44                         |
| 6     | CuBr <sub>2</sub>                                      | 38                         |
| 7     | CuCO <sub>3</sub> (OH) <sub>2</sub>                    | 50                         |
| 8     | CuSO <sub>4</sub>                                      | 52                         |
| 9     | CuI                                                    | 60                         |
| 10    | Cu(acac) <sub>2</sub>                                  | 42                         |
| 11    | CuCl <sub>2</sub>                                      | 42                         |
| 12    | Cu(CN) <sub>2</sub>                                    | 42                         |
| 13    | CuO                                                    | trace                      |
| 14    | CuBr                                                   | trace                      |

<sup>a</sup>Reaction conditions: **1a** (0.1 mmol), **2a** (2.0 equiv), **3a** (2.0 equiv), base (2.0 equiv), BzOO<sup>t</sup>Bu (2.0 equiv), copper catalyst (10 mol %), dtbbpy (15 mol %), acetone (1.0 mL) 50 °C for 12 h.

**Table S7.** Optimization of the mix solvent<sup>a</sup>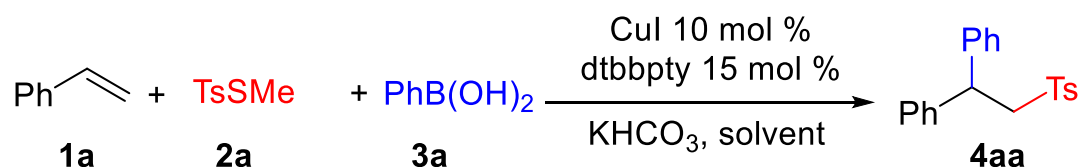

| entry | solvent            | assay yield/% <sup>b</sup> |
|-------|--------------------|----------------------------|
| 1     | acetone:DMSO = 7:3 | 42                         |
| 2     | acetone:DMF = 7:3  | 64                         |
| 3     | acetone:DMA = 7:3  | 30                         |
| 4     | acetone:MeOH = 7:3 | 48                         |
| 5     | acetone:EtOH = 7:3 | 44                         |
| 6     | acetone:MeCN = 7:3 | 46                         |

<sup>a</sup>Reaction conditions: **1a** (0.1 mmol), **2a** (1.5 equiv), **3a** (3.0 equiv), KHCO<sub>3</sub> (3.0 equiv), BzOO<sup>t</sup>Bu (3.0 equiv), CuI (10 mol %), dtbbpy (15 mol %), solvent (1.0 mL), 50 °C for 12 h. <sup>b</sup>Assay yield determined by <sup>1</sup>H NMR analysis of the crude reaction mixtures using 0.1 mmol CH<sub>2</sub>Br<sub>2</sub> (7.0 μL) as internal standard.

### 3) Characterization of Products

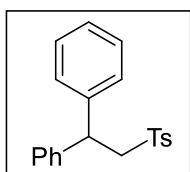

**(2-Tosylethane-1,1-diyl)dibenzene (4aa):** The reaction was performed following the General Procedure with **1a** (11.6  $\mu$ L, 0.10 mmol), **2a** (40.4 mg, 0.20 mmol), phenylboronic acid (30.5 mg, 0.25 mmol),  $\text{KHCO}_3$  (25.0 mg, 0.25 mmol), CuI (1.9 mg, 10 mol %), dtbbpy (4.0 mg, 15 mol %) and  $\text{BzOO}^t\text{Bu}$  (57.1  $\mu$ L, 0.30 mmol).

The crude product was purified by flash chromatography on silica gel (eluted with EtOAc:hexanes = 1:10) to give the product **4aa** (27.0 mg, 80% yield) as a colorless solid.  $R_f$  = 0.4 (EtOAc:hexanes = 1:6);  $^1\text{H}$  NMR (400 MHz,  $\text{CDCl}_3$ )  $\delta$  7.52 (d,  $J$  = 8.3 Hz, 2H), 7.22 – 7.16 (m, 4H), 7.16 – 7.09 (m, 8H), 4.60 (t,  $J$  = 7.1 Hz, 1H), 3.89 (d,  $J$  = 7.1 Hz, 2H), 2.37 (s, 3H) ppm;  $^{13}\text{C}$  NMR (100 MHz,  $\text{CDCl}_3$ )  $\delta$  144.2, 141.5, 136.6, 129.5, 128.7, 128.0, 127.6, 126.9, 61.6, 46.2, 21.6 ppm. Other spectroscopic data were previously reported.<sup>2</sup>

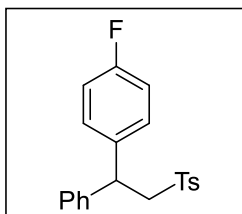

**1-Fluoro-4-(1-phenyl-2-tosylethyl)benzene (4ab):** The reaction was performed following the General Procedure with **1a** (11.6  $\mu$ L, 0.10 mmol), **2a** (40.4 mg, 0.20 mmol), (4-fluorophenyl)boronic acid (35.0 mg, 0.25 mmol),  $\text{KHCO}_3$  (25.0 mg, 0.25 mmol), CuI (1.9 mg, 10 mol %), dtbbpy (4.0 mg, 15 mol %) and  $\text{BzOO}^t\text{Bu}$  (57.1  $\mu$ L, 0.30 mmol). The crude

product was purified by flash chromatography on silica gel (eluted with EtOAc:hexanes = 1:12) to give the product **4ab** (29.5 mg, 83% yield) as a colorless solid.  $R_f$  = 0.6 (EtOAc:hexanes = 1:6); m.p. = 172–176  $^\circ\text{C}$ ; m.p. = 167–169  $^\circ\text{C}$ ;  $^1\text{H}$  NMR (400 MHz,  $\text{CDCl}_3$ )  $\delta$  7.52 (d,  $J$  = 8.3 Hz, 2H), 7.24 – 7.05 (m, 9H), 6.91 – 6.83 (m, 2H), 4.61 (t,  $J$  = 7.1 Hz, 1H), 3.91 – 3.79 (m, 2H), 2.38 (s, 3H) ppm;  $^{13}\text{C}$  NMR (100 MHz,  $\text{CDCl}_3$ )  $\delta$  161.7 (d,  $J_{\text{C-F}}$  = 246.2 Hz), 144.4, 141.5, 137.1 (d,  $J_{\text{C-F}}$  = 3.3 Hz), 136.6, 129.6, 129.2 (d,  $J_{\text{C-F}}$  = 8.0 Hz), 128.8, 128.0, 127.4, 127.0, 115.5 (d,  $J_{\text{C-F}}$  = 21.5 Hz), 61.6, 45.4, 31.0, 21.5 ppm; IR (thin film): 2922, 2349, 1508, 1290, 1219, 1164, 1135, 1086, 924, 840, 698, 633  $\text{cm}^{-1}$ ; HRMS calculated for  $\text{C}_{21}\text{H}_{20}\text{FO}_2\text{S}$  355.1163, found 355.1161  $[\text{M}+\text{H}]^+$ .

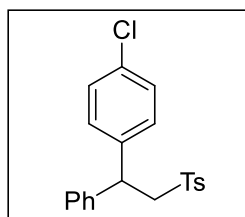

**1-Chloro-4-(1-phenyl-2-tosylethyl)benzene (4ac):** The reaction was performed following the General Procedure with **1a** (11.6  $\mu$ L, 0.10 mmol), **2a** (40.4 mg, 0.20 mmol), (4-chlorophenyl)boronic acid (39.1 mg, 0.25 mmol),  $\text{KHCO}_3$  (25.0 mg, 0.25 mmol), CuI (1.9 mg, 10 mol %), dtbbpy (4.0 mg, 15 mol %) and  $\text{BzOO}^t\text{Bu}$  (57.1  $\mu$ L, 0.30 mmol). The crude

product was purified by flash chromatography on silica gel (eluted with EtOAc:hexanes = 1:10) to give the product **4ac** (24.0 mg, 65% yield) as a colorless solid.  $R_f$  = 0.4 (EtOAc:hexanes = 1:6); m.p. = 178–181  $^\circ\text{C}$ ;  $^1\text{H}$  NMR (400 MHz,  $\text{CDCl}_3$ )  $\delta$  7.51 (d,  $J$  = 8.2 Hz, 2H), 7.23 – 7.02 (m, 11H), 4.59 (t,  $J$  = 7.1 Hz, 1H), 3.93 – 3.76 (m, 2H), 2.38 (s, 3H) ppm;  $^{13}\text{C}$  NMR (100 MHz,  $\text{CDCl}_3$ )  $\delta$  144.5, 141.2, 139.7, 136.5, 132.8, 129.6, 129.1, 128.9, 128.8, 128.0, 127.4, 127.1, 61.4, 45.6, 21.6 ppm; IR

(thin film): 1480, 1293, 1164, 1136, 1086, 1014, 925, 809, 772, 747, 716, 697  $\text{cm}^{-1}$ ; HRMS calculated for  $\text{C}_{21}\text{H}_{20}\text{ClO}_2\text{S}$  371.0867, found 371.0862  $[\text{M}+\text{H}]^+$ .

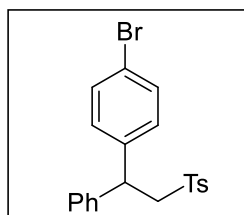

**1-Bromo-4-(1-phenyl-2-tosylethyl)benzene (4ad):** The reaction was performed following the General Procedure with **1a** (11.6  $\mu\text{L}$ , 0.10 mmol), **2a** (40.4 mg, 0.20 mmol), (4-bromophenyl)boronic acid (35.0 mg, 0.25 mmol),  $\text{KHCO}_3$  (25.0 mg, 0.25 mmol),  $\text{CuI}$  (1.9 mg, 10 mol %), dtbbpy (4.0 mg, 15 mol %) and  $\text{BzOO}^t\text{Bu}$  (57.1  $\mu\text{L}$ , 0.30 mmol). The crude product was purified by flash chromatography on silica gel (eluted with  $\text{EtOAc}:\text{hexanes} = 1:10$ ) to give the product **4ad** (23.2 mg, 56% yield) as a colorless solid.  $R_f = 0.4$  ( $\text{EtOAc}:\text{hexanes} = 1:6$ ); m.p. = 176–179  $^\circ\text{C}$ ;  $^1\text{H}$  NMR (400 MHz,  $\text{CDCl}_3$ )  $\delta$  7.50 (d,  $J = 8.3$  Hz, 2H), 7.30 – 7.26 (m, 2H), 7.24 – 7.12 (m, 5H), 7.12 – 7.07 (m, 2H), 6.98 (d,  $J = 8.5$  Hz, 2H), 4.60 – 4.54 (m, 1H), 3.91 – 3.78 (m, 2H), 2.39 (s, 3H) ppm;  $^{13}\text{C}$  NMR (100 MHz,  $\text{CDCl}_3$ )  $\delta$  144.5, 141.1, 140.2, 136.5, 131.7, 129.6, 129.5, 128.9, 128.0, 127.4, 127.1, 120.9, 61.3, 45.7, 21.6 ppm; IR (thin film): 1542, 1489, 1293, 1137, 925, 809, 745, 669, 658  $\text{cm}^{-1}$ ; HRMS calculated for  $\text{C}_{21}\text{H}_{21}\text{BrO}_2\text{S}$  415.0362, found 415.0362  $[\text{M}+\text{H}]^+$ .

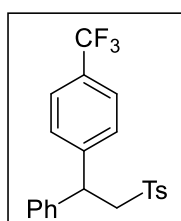

**1-Methyl-4-((2-phenyl-2-(4-(trifluoromethyl)phenyl)ethyl)sulfonyl)benzene (4ae):** The reaction was performed following the General Procedure with **1a** (11.6  $\mu\text{L}$ , 0.10 mmol), **2a** (40.4 mg, 0.20 mmol), (4-(trifluoromethyl)phenyl)boronic acid (47.5 mg, 0.25 mmol),  $\text{KHCO}_3$  (25.0 mg, 0.25 mmol),  $\text{CuI}$  (1.9 mg, 10 mol %), dtbbpy (4.0 mg, 15 mol %) and  $\text{BzOO}^t\text{Bu}$  (57.1  $\mu\text{L}$ , 0.30 mmol). The crude product was purified by flash chromatography on silica gel (eluted with  $\text{EtOAc}:\text{hexanes} = 1:10$ ) to give the product **4ae** (24.2 mg, 60% yield) as a colorless solid.  $R_f = 0.4$  ( $\text{EtOAc}:\text{hexanes} = 1:6$ ); m.p. = 140–146  $^\circ\text{C}$ ;  $^1\text{H}$  NMR (400 MHz,  $\text{CDCl}_3$ )  $\delta$  7.49 (d,  $J = 8.1$  Hz, 2H), 7.38 (d,  $J = 8.1$  Hz, 2H), 7.25 – 7.05 (m, 9H), 4.68 (dd,  $J = 8.3, 5.9$  Hz, 1H), 4.04 – 3.92 (m, 1H), 3.90 – 3.79 (m, 1H), 2.33 (s, 3H) ppm;  $^{13}\text{C}$  NMR (100 MHz,  $\text{CDCl}_3$ )  $\delta$  145.1, 144.6, 140.9, 136.4, 129.6, 129.2 (q,  $J_{\text{C-F}} = 32.7$  Hz), 129.0, 128.2, 127.4, 127.3, 125.6 (q,  $J_{\text{C-F}} = 3.7$  Hz), 124.0 (q,  $J_{\text{C-F}} = 272.1$  Hz), 61.1, 46.2, 21.4 ppm; IR (thin film): 2361, 1653, 1419, 1327, 1162, 1128, 1087, 1060, 1019, 910, 812, 761, 700  $\text{cm}^{-1}$ ; HRMS calculated for  $\text{C}_{22}\text{H}_{19}\text{F}_3\text{O}_2\text{SNa}$  427.0950, found 427.0949  $[\text{M}+\text{Na}]^+$ .

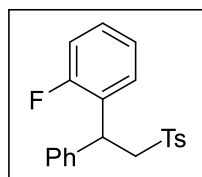

**1-Fluoro-2-(1-phenyl-2-tosylethyl)benzene (4af):** The reaction was performed following the General Procedure with **1a** (11.6  $\mu\text{L}$ , 0.10 mmol), **2a** (40.4 mg, 0.20 mmol), (2-fluorophenyl)boronic acid (35.0 mg, 0.25 mmol),  $\text{KHCO}_3$  (25.0 mg, 0.25 mmol),  $\text{CuI}$  (1.9 mg, 10 mol %), dtbbpy (4.0 mg, 15 mol %) and  $\text{BzOO}^t\text{Bu}$  (57.1  $\mu\text{L}$ , 0.30 mmol). The crude product was purified by flash chromatography on silica gel (eluted with  $\text{EtOAc}:\text{hexanes} = 1:10$ ) to give the product **4af** (21.3 mg, 60% yield) as a colorless solid.  $R_f = 0.5$  ( $\text{EtOAc}:\text{hexanes} = 1:6$ ); m.p. = 104–106  $^\circ\text{C}$ ;  $^1\text{H}$  NMR (400



MHz, CDCl<sub>3</sub>)  $\delta$  7.56 (d,  $J$  = 8.3 Hz, 2H), 7.24 – 7.06 (m, 9H), 7.03 – 6.94 (m, 1H), 6.91 – 6.81 (m, 1H), 4.80 (dd,  $J$  = 8.3, 6.1 Hz, 1H), 4.02 (dd,  $J$  = 14.6, 8.3 Hz, 1H), 3.85 (dd,  $J$  = 14.6, 6.1 Hz, 1H), 2.36 (s, 3H) ppm; <sup>13</sup>C NMR (100 MHz, CDCl<sub>3</sub>)  $\delta$  160.3 (d,  $J_{C-F}$  = 246.2 Hz), 144.3, 140.5, 136.3, 129.6, 129.3 (d,  $J_{C-F}$  = 4.2 Hz), 128.8, 128.3 (d,  $J_{C-F}$  = 13.4 Hz), 128.0, 127.6, 127.1, 124.3 (d,  $J_{C-F}$  = 3.4 Hz), 115.9 (d,  $J_{C-F}$  = 22.3 Hz), 60.0 (d,  $J_{C-F}$  = 2.7 Hz), 40.6, 21.6 ppm; IR (thin film): 2924, 1597, 1494, 1456, 1408, 1230, 1162, 1085, 1035, 914, 819, 740, 567, 462 cm<sup>-1</sup>; HRMS calculated for C<sub>21</sub>H<sub>20</sub>FO<sub>2</sub>S 355.1163, found 355.1161 [M+H]<sup>+</sup>.

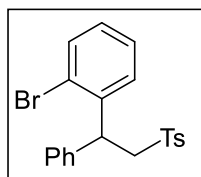

**1-Bromo-2-(1-phenyl-2-tosylethyl)benzene (4ag):** The reaction was performed following the General Procedure with **1a** (11.6  $\mu$ L, 0.10 mmol), **2a** (40.4 mg, 0.20 mmol), (2-bromophenyl)boronic acid (50.2 mg, 0.25 mmol), KHCO<sub>3</sub> (25.0 mg, 0.25 mmol), CuI (1.9 mg, 10 mol %), dtbbpy (4.0 mg, 15 mol %) and BzOO<sup>t</sup>Bu (57.1  $\mu$ L, 0.30 mmol). The crude product was purified by flash chromatography on silica gel (eluted with EtOAc:hexanes = 1:10) to give the product **4ag** (23.5 mg, 57% yield) as a colorless solid.  $R_f$  = 0.5 (EtOAc:hexanes = 1:6); m.p. = 106–108 °C; <sup>1</sup>H NMR (400 MHz, CDCl<sub>3</sub>)  $\delta$  7.60 (d,  $J$  = 8.2 Hz, 2H), 7.47 (d,  $J$  = 8.2 Hz, 1H), 7.25 – 7.13 (m, 7H), 7.14 – 7.08 (m, 2H), 7.03 – 6.96 (m, 1H), 5.09 (t,  $J$  = 7.1 Hz, 1H), 3.90 (dd,  $J$  = 14.7, 7.1 Hz, 1H), 3.81 (dd,  $J$  = 14.7, 7.1 Hz, 1H), 2.37 (s, 3H) ppm; <sup>13</sup>C NMR (100 MHz, CDCl<sub>3</sub>)  $\delta$  144.5, 140.1, 140.0, 136.2, 133.5, 129.6, 128.8, 128.7, 128.4, 128.2, 128.0, 127.6, 127.1, 124.6, 60.7, 44.7, 21.6 ppm; IR (thin film): 2358, 1597, 1467, 1438, 1138, 1085, 1020, 918, 813, 746, 698, 563, 514 cm<sup>-1</sup>; HRMS calculated for C<sub>21</sub>H<sub>19</sub>BrO<sub>2</sub>SNa 437.0181, found 437.0176 [M+Na]<sup>+</sup>.

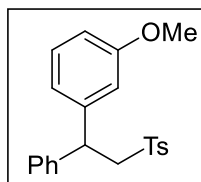

**1-Methoxy-3-(1-phenyl-2-tosylethyl)benzene (4ah):** The reaction was performed following the General Procedure with **1a** (11.6  $\mu$ L, 0.10 mmol), **2a** (40.4 mg, 0.20 mmol), (3-methoxyphenyl)boronic acid (38.0 mg, 0.25 mmol), KHCO<sub>3</sub> (25.0 mg, 0.25 mmol), CuI (1.9 mg, 10 mol %), dtbbpy (4.0 mg, 15 mol %) and BzOO<sup>t</sup>Bu (57.1  $\mu$ L, 0.30 mmol). The crude product was purified by flash chromatography on silica gel (eluted with EtOAc:hexanes = 1:8) to give the product **4ah** (26.0 mg, 71% yield) as a colorless solid.  $R_f$  = 0.3 (EtOAc:hexanes = 1:6); m.p. = 74–76 °C; <sup>1</sup>H NMR (400 MHz, CDCl<sub>3</sub>)  $\delta$  7.52 (d,  $J$  = 8.2 Hz, 2H), 7.21 – 7.07 (m, 8H), 6.73 (d,  $J$  = 7.7 Hz, 1H), 6.66 (dd,  $J$  = 8.2, 2.1 Hz, 1H), 6.61 (d,  $J$  = 1.8 Hz, 1H), 4.56 (t,  $J$  = 7.1 Hz, 1H), 3.87 (d,  $J$  = 7.1 Hz, 2H), 3.70 (s, 3H), 2.36 (s, 3H) ppm; <sup>13</sup>C NMR (100 MHz, CDCl<sub>3</sub>)  $\delta$  159.7, 144.2, 143.0, 141.4, 136.6, 129.7, 129.5, 128.7, 128.0, 127.6, 126.9, 120.0, 113.7, 111.9, 61.5, 55.1, 46.2, 21.6 ppm; IR (thin film): 2922, 1593, 1447, 1306, 1143, 1105, 997, 816, 757, 725, 702, 687, 652 cm<sup>-1</sup>; HRMS calculated for C<sub>22</sub>H<sub>22</sub>O<sub>3</sub>SNa 389.1182, found 389.1177 [M+Na]<sup>+</sup>.

**4-(1-Phenyl-2-tosylethyl)benzaldehyde (4ai):** The reaction was performed following the General Procedure with **1a** (11.6  $\mu$ L, 0.10 mmol), **2a** (40.4 mg, 0.20 mmol), (4-formylphenyl)boronic acid (37.5 mg, 0.25 mmol), KHCO<sub>3</sub> (25.0 mg, 0.25 mmol),

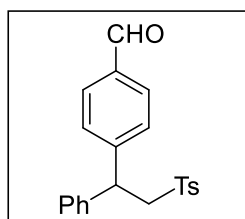

CuI (1.9 mg, 10 mol %), dtbbpy (4.0 mg, 15 mol %) and BzOO<sup>t</sup>Bu (57.1  $\mu$ L, 0.30 mmol). The crude product was purified by flash chromatography on silica gel (eluted with EtOAc:hexanes = 1:2) to give the product **4ai** (19.0 mg, 52% yield) as a colorless solid.  $R_f$  = 0.2 (EtOAc:hexanes = 1:3); m.p. = 149–153  $^{\circ}$ C;  $^1\text{H}$  NMR (400 MHz,  $\text{CDCl}_3$ )  $\delta$  9.93 (s, 1H), 7.71 (d,  $J$  = 8.2 Hz, 2H), 7.55 (d,  $J$  = 8.2 Hz, 2H), 7.32 (d,  $J$  = 8.2 Hz, 2H), 7.25 – 7.10 (m, 7H), 4.73 – 4.67 (m, 1H), 3.97 – 3.82 (m, 2H), 2.36 (s, 3H) ppm;  $^{13}\text{C}$  NMR (100 MHz,  $\text{CDCl}_3$ )  $\delta$  191.6, 148.2, 144.6, 140.6, 136.4, 135.2, 130.1, 129.7, 129.0, 128.4, 128.0, 127.5, 127.3, 61.0, 46.3, 21.6 ppm; IR (thin film): 2924, 1696, 1605, 1451, 1299, 1136, 1086, 912, 809, 762, 734, 700  $\text{cm}^{-1}$ ; HRMS calculated for  $\text{C}_{22}\text{H}_{21}\text{O}_3\text{S}$  365.1206, found 365.1203  $[\text{M}+\text{H}]^+$ .

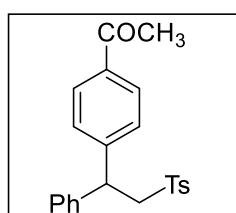

**1-(4-(1-Phenyl-2-tosylethyl)phenyl)ethan-1-one (4aj):** The reaction was performed following the General Procedure with **1a** (11.6  $\mu$ L, 0.10 mmol), **2a** (40.4 mg, 0.20 mmol), (4-acetylphenyl)boronic acid (41.0 mg, 0.25 mmol),  $\text{KHCO}_3$  (25.0 mg, 0.25 mmol), CuI (1.9 mg, 10 mol %), dtbbpy (4.0 mg, 15 mol %) and BzOO<sup>t</sup>Bu (57.1  $\mu$ L, 0.30 mmol). The crude product was purified by flash chromatography on silica gel (eluted with EtOAc:hexanes = 1: 2) to give the product **4aj** (32.5 mg, 86% yield) as a colorless solid.  $R_f$  = 0.2 (EtOAc:hexanes = 1:3); m.p. = 125–129  $^{\circ}$ C;  $^1\text{H}$  NMR (400 MHz,  $\text{CDCl}_3$ )  $\delta$  7.79 (d,  $J$  = 8.3 Hz, 2H), 7.54 (d,  $J$  = 8.3 Hz, 2H), 7.25 – 7.07 (m, 9H), 4.68 (t,  $J$  = 7.1 Hz, 1H), 3.98 – 3.81 (m, 2H), 2.54 (s, 3H), 2.37 (s, 3H) ppm;  $^{13}\text{C}$  NMR (100 MHz,  $\text{CDCl}_3$ )  $\delta$  197.4, 146.6, 144.6, 140.8, 136.5, 135.8, 129.6, 128.9, 128.8, 128.0, 127.9, 127.5, 127.2, 61.1, 46.1, 26.6, 21.6 ppm; IR (thin film): 1653, 1269, 1137, 1086, 912, 812, 756, 732, 702, 633  $\text{cm}^{-1}$ ; HRMS calculated for  $\text{C}_{23}\text{H}_{23}\text{O}_3\text{S}$  379.1362, found 379.1358  $[\text{M}+\text{H}]^+$ .

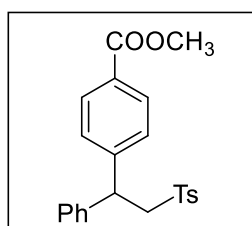

**Methyl 4-(1-phenyl-2-tosylethyl)benzoate (4ak):** The reaction was performed following the General Procedure with **1a** (11.6  $\mu$ L, 0.10 mmol), **2a** (40.4 mg, 0.20 mmol), (4-(methoxycarbonyl)phenyl)boronic acid (45.0 mg, 0.25 mmol),  $\text{KHCO}_3$  (25.0 mg, 0.25 mmol), CuI (1.9 mg, 10 mol %), dtbbpy (4.0 mg, 15 mol %) and BzOO<sup>t</sup>Bu (57.1  $\mu$ L, 0.30 mmol). The crude product was purified by flash chromatography on silica gel (eluted with EtOAc:hexanes = 1:2) to give the product **4ak** (34.5 mg, 88% yield) as a colorless solid.  $R_f$  = 0.2 (EtOAc:hexanes = 1:3); m.p. = 140–145  $^{\circ}$ C;  $^1\text{H}$  NMR (400 MHz,  $\text{CDCl}_3$ )  $\delta$  7.84 (d,  $J$  = 7.9 Hz, 2H), 7.52 (d,  $J$  = 7.9 Hz, 2H), 7.24 – 7.07 (m, 9H), 4.66 (t,  $J$  = 6.9 Hz, 1H), 3.97 – 3.81 (m, 5H), 2.36 (s, 3H) ppm;  $^{13}\text{C}$  NMR (100 MHz,  $\text{CDCl}_3$ )  $\delta$  166.7, 146.4, 144.5, 140.9, 136.4, 130.0, 129.6, 128.9, 128.8, 128.0, 127.8, 127.5, 127.2, 61.2, 52.1, 46.2, 21.5 ppm; IR (thin film): 1718, 1430, 1275, 1191, 1135, 1084, 910, 765, 707  $\text{cm}^{-1}$ ; HRMS calculated for  $\text{C}_{23}\text{H}_{23}\text{O}_4\text{S}$  395.1312, found 395.1309  $[\text{M}+\text{H}]^+$ .

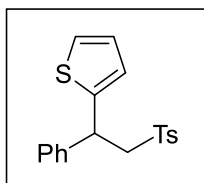

**2-(1-Phenyl-2-tosylethyl)thiophene (4al):** The reaction was performed following the General Procedure with **1a** (11.6  $\mu$ L, 0.10 mmol), **2a** (40.4 mg, 0.20 mmol), thiophen-2-ylboronic acid (32.0 mg, 0.25 mmol),  $\text{KHCO}_3$  (25.0 mg, 0.25 mmol), CuI (1.9 mg, 10 mol %), dtbbpy (4.0 mg, 15 mol %) and  $\text{BzOO}^t\text{Bu}$  (57.1  $\mu$ L, 0.30 mmol). The crude product was purified by flash chromatography on silica gel (eluted with EtOAc:hexanes = 1:10) to give the product **4al** (11.0 mg, 32% yield) as a colorless solid.  $R_f$  = 0.4 (EtOAc:hexanes = 1:6); m.p. = 125–127  $^\circ\text{C}$ ;  $^1\text{H}$  NMR (400 MHz,  $\text{CDCl}_3$ )  $\delta$  7.53 (d,  $J$  = 8.3 Hz, 2H), 7.24 – 7.12 (m, 7H), 7.10 (dd,  $J$  = 5.1, 1.1 Hz, 1H), 6.86 – 6.79 (m, 1H), 6.77 (d,  $J$  = 3.5 Hz, 1H), 4.85 (t,  $J$  = 7.0 Hz, 1H), 3.95 – 3.83 (m, 2H), 2.38 (s, 3H) ppm;  $^{13}\text{C}$  NMR (100 MHz,  $\text{CDCl}_3$ )  $\delta$  145.5, 144.3, 141.1, 136.6, 129.6, 128.8, 128.0, 127.6, 127.3, 126.8, 124.8, 124.6, 62.7, 42.0, 21.6 ppm; IR (thin film): 2919, 2360, 1597, 1408, 1287, 1169, 1135, 1083, 1017, 920, 873, 842, 807, 775, 759, 739, 723, 697, 628  $\text{cm}^{-1}$ ; HRMS calculated for  $\text{C}_{19}\text{H}_{18}\text{O}_2\text{S}_2\text{Na}$  365.0640, found 365.0637  $[\text{M}+\text{Na}]^+$ .

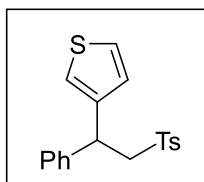

**3-(1-Phenyl-2-tosylethyl)thiophene (4am):** The reaction was performed following the General Procedure with **1a** (11.6  $\mu$ L, 0.10 mmol), **2a** (40.4 mg, 0.20 mmol), thiophen-3-ylboronic acid (32.0 mg, 0.25 mmol),  $\text{KHCO}_3$  (25.0 mg, 0.25 mmol), CuI (1.9 mg, 10 mol %), dtbbpy (4.0 mg, 15 mol %) and  $\text{BzOO}^t\text{Bu}$  (57.1  $\mu$ L, 0.30 mmol). The crude product was purified by flash chromatography on silica gel (eluted with EtOAc:hexanes = 1:10) to give the product **4am** (15.0 mg, 44% yield) as a colorless solid.  $R_f$  = 0.4 (EtOAc:hexanes = 1:6); m.p. = 157–159  $^\circ\text{C}$ ;  $^1\text{H}$  NMR (400 MHz,  $\text{CDCl}_3$ )  $\delta$  7.53 (d,  $J$  = 7.9 Hz, 2H), 7.23 – 7.02 (m, 8H), 6.88 (s, 1H), 6.80 (d,  $J$  = 4.6 Hz, 1H), 4.68 (t,  $J$  = 6.8 Hz, 1H), 3.94 – 3.74 (m, 2H), 2.38 (s, 3H) ppm;  $^{13}\text{C}$  NMR (100 MHz,  $\text{CDCl}_3$ )  $\delta$  144.2, 142.2, 141.2, 136.6, 129.6, 128.7, 127.9, 127.7, 127.0, 126.9, 126.2, 121.4, 62.0, 41.9, 21.6 ppm; IR (thin film): 2921, 1645, 1494, 1234, 1132, 1085, 921, 842, 798, 755, 698  $\text{cm}^{-1}$ ; HRMS calculated for  $\text{C}_{19}\text{H}_{19}\text{O}_2\text{S}_2$  343.0821, found 343.0820  $[\text{M}+\text{H}]^+$ .

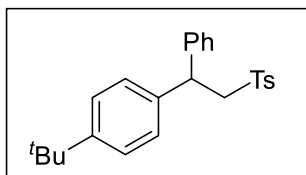

**1-(tert-Butyl)-4-(1-phenyl-2-tosylethyl)benzene (5aa):** The reaction was performed following the General Procedure with 1-(tert-butyl)-4-vinylbenzene (18.3  $\mu$ L, 0.10 mmol), **2a** (40.4 mg, 0.20 mmol), **3a** (30.5 mg, 0.25 mmol),  $\text{KHCO}_3$  (25.0 mg, 0.25 mmol), CuI (1.9 mg, 10 mol %), dtbbpy (4.0 mg, 15 mol %) and  $\text{BzOO}^t\text{Bu}$  (57.1  $\mu$ L, 0.30 mmol). The crude product was purified by flash chromatography on silica gel (eluted with EtOAc:hexanes = 1:12) to give the product **5aa** (27.2 mg, 70% yield) as a colorless solid.  $R_f$  = 0.5 (EtOAc:hexanes = 1:6); m.p. = 172–176  $^\circ\text{C}$ ;  $^1\text{H}$  NMR (400 MHz,  $\text{CDCl}_3$ )  $\delta$  7.49 (d,  $J$  = 8.3 Hz, 2H), 7.22 – 7.06 (m, 9H), 7.02 (d,  $J$  = 8.3 Hz, 2H), 4.58 (t,  $J$  = 7.1 Hz, 1H), 3.97 – 3.81 (m, 2H), 2.35 (s, 3H), 1.24 (s, 9H) ppm;  $^{13}\text{C}$  NMR (100 MHz,  $\text{CDCl}_3$ )  $\delta$  149.7, 144.0, 141.8, 138.3, 136.7, 129.4, 128.7, 128.0, 127.6,

127.2, 126.8, 125.6, 61.7, 45.9, 34.3, 31.3, 21.6 ppm; IR (thin film): 2921, 2360, 1397, 1293, 1136, 1086, 809, 752, 699  $\text{cm}^{-1}$ ; HRMS calculated for  $\text{C}_{25}\text{H}_{28}\text{O}_2\text{SNa}$  415.1702, found 415.1701  $[\text{M}+\text{Na}]^+$ .

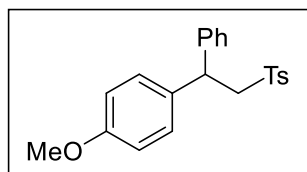

**1-Methoxy-4-(1-phenyl-2-tosylethyl)benzene (5ab):** The reaction was performed following the General Procedure with 1-methoxy-4-vinylbenzene (13.3  $\mu\text{L}$ , 0.10 mmol), **2a** (40.4 mg, 0.20 mmol), **3a** (30.5 mg, 0.25 mmol),  $\text{KHCO}_3$  (25.0 mg, 0.25 mmol),  $\text{CuI}$  (1.9 mg, 10 mol %), dtbbpy (4.0 mg, 15 mol %) and  $\text{BzOO}^t\text{Bu}$  (57.1  $\mu\text{L}$ , 0.30 mmol). The crude product was purified by flash chromatography on silica gel (eluted with  $\text{EtOAc}:\text{hexanes} = 1:8$ ) to give the product **5ab** (27.0 mg, 74% yield) as a colorless solid.  $R_f = 0.4$  ( $\text{EtOAc}:\text{hexanes} = 1:6$ );  $^1\text{H}$  NMR (400 MHz,  $\text{CDCl}_3$ )  $\delta$  7.54 (d,  $J = 8.2$  Hz, 2H), 7.24 – 7.11 (m, 7H), 7.08 – 7.02 (m, 2H), 6.76 – 6.71 (m, 2H), 4.58 (t,  $J = 7.2$  Hz, 1H), 3.88 (d,  $J = 7.2$  Hz, 2H), 3.76 (s, 3H), 2.40 (s, 3H) ppm;  $^{13}\text{C}$  NMR (100 MHz,  $\text{CDCl}_3$ )  $\delta$  158.4, 144.1, 141.9, 136.7, 133.5, 129.5, 128.7, 128.6, 128.0, 127.5, 126.8, 114.1, 61.8, 55.2, 45.4, 21.5 ppm. Other spectroscopic data were previously reported.<sup>3</sup>

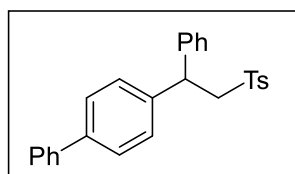

**4-(1-Phenyl-2-tosylethyl)-1,1'-biphenyl (5ac):** The reaction was performed following the General Procedure with 1-phenyl-4-vinylbenzene (18.1  $\mu\text{L}$ , 0.10 mmol), **2a** (40.4 mg, 0.20 mmol), **3a** (30.5 mg, 0.25 mmol),  $\text{KHCO}_3$  (25.0 mg, 0.25 mmol),  $\text{CuI}$  (1.9 mg, 10 mol %), dtbbpy (4.0 mg, 15 mol %) and  $\text{BzOO}^t\text{Bu}$  (57.1  $\mu\text{L}$ , 0.30 mmol). The crude product was purified by flash chromatography on silica gel (eluted with  $\text{EtOAc}:\text{hexanes} = 1:8$ ) to give the product **5ac** (36.0 mg, 87% yield) as a colorless solid.  $R_f = 0.4$  ( $\text{EtOAc}:\text{hexanes} = 1:6$ ); m.p. = 175–179  $^\circ\text{C}$ ;  $^1\text{H}$  NMR (400 MHz,  $\text{CDCl}_3$ )  $\delta$  7.55 – 7.46 (m, 4H), 7.45 – 7.35 (m, 4H), 7.36 – 7.29 (m, 1H), 7.24 – 7.13 (m, 7H), 7.10 (d,  $J = 8.0$  Hz, 2H), 4.65 (t,  $J = 7.1$  Hz, 1H), 4.00 – 3.85 (m, 2H), 2.32 (s, 3H) ppm;  $^{13}\text{C}$  NMR (100 MHz,  $\text{CDCl}_3$ )  $\delta$  144.2, 141.5, 140.6, 140.3, 139.8, 136.6, 129.5, 128.8, 128.7, 128.1, 128.0, 127.6, 127.4, 127.3, 127.0, 61.6, 46.0, 21.5 ppm; IR (thin film): 2920, 2851, 2361, 1653, 1473, 1397, 1289, 1164, 1136, 1087, 908, 808, 728, 637  $\text{cm}^{-1}$ ; HRMS calculated for  $\text{C}_{27}\text{H}_{24}\text{O}_2\text{SNa}$  435.1389, found 435.1391  $[\text{M}+\text{Na}]^+$ .

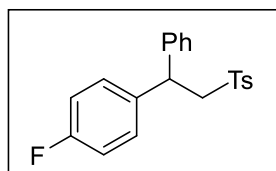

**1-Fluoro-4-(1-phenyl-2-tosylethyl)benzene (4ab) (from 1-fluoro-4-vinylbenzene):** The reaction was performed following the General Procedure with 1-fluoro-4-vinylbenzene (12.0  $\mu\text{L}$ , 0.10 mmol), **2a** (40.4 mg, 0.20 mmol), **3a** (30.5 mg, 0.25 mmol),  $\text{KHCO}_3$  (25.0 mg, 0.25 mmol),  $\text{CuI}$  (1.9 mg, 10 mol %), dtbbpy (4.0 mg, 15 mol %) and  $\text{BzOO}^t\text{Bu}$  (57.1  $\mu\text{L}$ , 0.30 mmol). The crude product was purified by flash chromatography on silica gel (eluted with  $\text{EtOAc}:\text{hexanes} = 1:10$ ) to give the product **4ab** (22.0 mg, 62% yield) as a colorless solid.  $R_f = 0.4$  ( $\text{EtOAc}:\text{hexanes} = 1:6$ ).

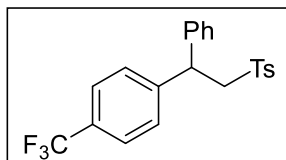

**1-Methyl-4-((2-phenyl-2-(4-(trifluoromethyl)phenyl)ethyl)sulfonyl)benzene (4ae) (from 1-(trifluoromethyl)-4-vinylbenzene):** The reaction was performed following the General Procedure with 1-(trifluoromethyl)-4-vinylbenzene (14.8  $\mu$ L, 0.10 mmol), **2a** (40.4 mg, 0.20 mmol), **3a** (30.5 mg, 0.25 mmol),  $\text{KHCO}_3$  (25.0 mg, 0.25 mmol), CuI (1.9 mg, 10 mol %), dtbbpy (4.0 mg, 15 mol %) and  $\text{BzOO}^t\text{Bu}$  (57.1  $\mu$ L, 0.30 mmol). The crude product was purified by flash chromatography on silica gel (eluted with EtOAc:hexanes = 1:12) to give the product **4ae** (26.3 mg, 65% yield) as a colorless solid.  $R_f$  = 0.6 (EtOAc:hexanes = 1:6).

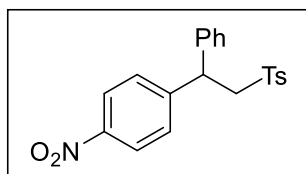

**1-Methyl-4-((2-(4-nitrophenyl)-2-phenylethyl)sulfonyl)benzene (5ad):** The reaction was performed following the General Procedure with 1-nitro-4-vinylbenzene (12.8  $\mu$ L, 0.10 mmol), **2a** (40.4 mg, 0.20 mmol), **3a** (30.5 mg, 0.25 mmol),  $\text{KHCO}_3$  (25.0 mg, 0.25 mmol), CuI (1.9 mg, 10 mol %), dtbbpy (4.0 mg, 15 mol %) and  $\text{BzOO}^t\text{Bu}$  (57.1  $\mu$ L, 0.30 mmol). The crude product was purified by flash chromatography on silica gel (eluted with EtOAc:hexanes = 1:4) to give the product **5ad** (25.0 mg, 66% yield) as a colorless solid.  $R_f$  = 0.4 (EtOAc:hexanes = 1:3); m.p. = 96–100  $^\circ\text{C}$ ;  $^1\text{H}$  NMR (400 MHz,  $\text{CDCl}_3$ )  $\delta$  8.05 (d,  $J$  = 8.8 Hz, 2H), 7.56 (d,  $J$  = 8.3 Hz, 2H), 7.33 (d,  $J$  = 8.8 Hz, 2H), 7.27 – 7.16 (m, 5H), 7.14 – 7.07 (m, 2H), 4.74 (dd,  $J$  = 8.3, 5.8 Hz, 1H), 3.94 (dd,  $J$  = 14.5, 8.5 Hz, 1H), 3.85 (dd,  $J$  = 14.5, 5.8 Hz, 1H), 2.38 (s, 3H) ppm;  $^{13}\text{C}$  NMR (100 MHz,  $\text{CDCl}_3$ )  $\delta$  148.6, 146.8, 144.9, 140.2, 136.4, 129.7, 129.2, 128.7, 128.0, 127.6, 127.4, 123.9, 60.9, 45.9, 21.6 ppm; IR (thin film): 2923, 2361, 1599, 1521, 1348, 1282, 1164, 1128, 925, 856, 810, 766, 746, 703, 655  $\text{cm}^{-1}$ ; HRMS calculated for  $\text{C}_{21}\text{H}_{19}\text{NO}_4\text{SNa}$  404.0927, found 404.0929  $[\text{M}+\text{Na}]^+$ .

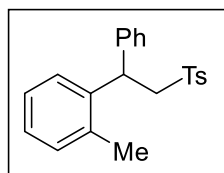

**1-Methyl-2-(1-phenyl-2-tosylethyl)benzene (5ae):** The reaction was performed following the General Procedure with 1-methyl-2-vinylbenzene (12.9  $\mu$ L, 0.10 mmol), **2a** (40.4 mg, 0.20 mmol), **3a** (30.5 mg, 0.25 mmol),  $\text{KHCO}_3$  (25.0 mg, 0.25 mmol), CuI (1.9 mg, 10 mol %), dtbbpy (4.0 mg, 15 mol %) and  $\text{BzOO}^t\text{Bu}$  (57.1  $\mu$ L, 0.30 mmol). The crude product was purified by flash chromatography on silica gel (eluted with EtOAc:hexanes = 1:12) to give the product **5ae** (23.5 mg, 67% yield) as a colorless solid.  $R_f$  = 0.5 (EtOAc:hexanes = 1:6); m.p. = 123–126  $^\circ\text{C}$ ;  $^1\text{H}$  NMR (400 MHz,  $\text{CDCl}_3$ )  $\delta$  7.53 (d,  $J$  = 8.3 Hz, 2H), 7.23 – 7.16 (m, 2H), 7.16 – 7.10 (m, 5H), 7.10 – 6.98 (m, 4H), 4.86 (t,  $J$  = 7.0 Hz, 1H), 3.91 – 3.79 (m, 2H), 2.36 (s, 3H), 2.31 (s, 3H) ppm;  $^{13}\text{C}$  NMR (100 MHz,  $\text{CDCl}_3$ )  $\delta$  144.3, 141.0, 139.2, 136.7, 136.0, 130.9, 129.5, 128.6, 128.0, 127.9, 126.8, 126.7, 126.6, 126.1, 61.7, 41.6, 21.6, 19.8 ppm; IR (thin film): 2922, 1597, 1494, 1466, 1294, 1155, 1131, 1081, 909, 783, 748, 733, 700, 636  $\text{cm}^{-1}$ ; HRMS calculated for  $\text{C}_{22}\text{H}_{22}\text{O}_2\text{SNa}$  373.1233, found 373.1231  $[\text{M}+\text{Na}]^+$ .

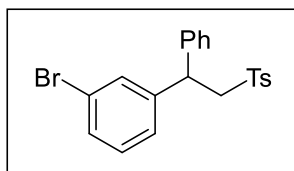

**1-Bromo-3-(1-phenyl-2-tosylethyl)benzene (5af):** The reaction was performed following the General Procedure with 1-bromo-3-vinylbenzene (15.8  $\mu$ L, 0.10 mmol), **2a** (40.4 mg, 0.20 mmol), **3a** (30.5 mg, 0.25 mmol),  $\text{KHCO}_3$  (25.0 mg, 0.25 mmol), CuI (1.9 mg, 10 mol %), dtbbpy (4.0 mg, 15 mol %) and  $\text{BzOO}^t\text{Bu}$  (57.1  $\mu$ L, 0.30 mmol). The crude product was purified by flash chromatography on silica gel (eluted with EtOAc:hexanes = 1:12) to give the product **5af** (32.5 mg, 79% yield) as a colorless solid.  $R_f$  = 0.4 (EtOAc:hexanes = 1:6); m.p. = 155–158  $^\circ\text{C}$ ;  $^1\text{H}$  NMR (400 MHz,  $\text{CDCl}_3$ )  $\delta$  7.51 (d,  $J$  = 8.3 Hz, 2H), 7.25 – 7.02 (m, 11H), 4.59 – 4.54 (m, 1H), 3.93 – 3.77 (m, 2H), 2.38 (s, 3H) ppm;  $^{13}\text{C}$  NMR (100 MHz,  $\text{CDCl}_3$ )  $\delta$  144.5, 143.4, 141.0, 136.3, 130.6, 130.3, 130.0, 129.6, 128.9, 127.9, 127.4, 127.2, 126.6, 122.7, 61.2, 46.0, 21.6 ppm; IR (thin film): 2361, 1559, 1541, 1473, 1397, 1299, 1164, 1135, 797, 773, 748, 704, 640  $\text{cm}^{-1}$ ; HRMS calculated for  $\text{C}_{21}\text{H}_{19}\text{BrO}_2\text{SNa}$  437.0181, found 437.0180  $[\text{M}+\text{Na}]^+$ .

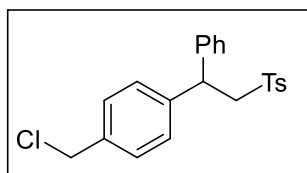

**1-(Chloromethyl)-4-(1-phenyl-2-tosylethyl)benzene (5ag):** The reaction was performed following the General Procedure with 1-(chloromethyl)-4-vinylbenzene (14.1  $\mu$ L, 0.10 mmol), **2a** (40.4 mg, 0.20 mmol), **3a** (30.5 mg, 0.25 mmol),  $\text{KHCO}_3$  (25.0 mg, 0.25 mmol), CuI (1.9 mg, 10 mol %), dtbbpy (4.0 mg, 15 mol %) and  $\text{BzOO}^t\text{Bu}$  (57.1  $\mu$ L, 0.30 mmol). The crude product was purified by flash chromatography on silica gel (eluted with EtOAc:hexanes = 1:6) to give the product **5ag** (24.5 mg, 64% yield) as a colorless solid.  $R_f$  = 0.3 (EtOAc:hexanes = 1:6); m.p. = 133–136  $^\circ\text{C}$ ;  $^1\text{H}$  NMR (400 MHz,  $\text{CDCl}_3$ )  $\delta$  7.50 (d,  $J$  = 8.2 Hz, 2H), 7.24 – 7.06 (m, 11H), 4.62 (t,  $J$  = 7.1 Hz, 1H), 4.48 (s, 2H), 3.97 – 3.78 (m, 2H), 2.36 (s, 3H) ppm;  $^{13}\text{C}$  NMR (100 MHz,  $\text{CDCl}_3$ )  $\delta$  144.3, 141.6, 141.4, 136.5, 136.1, 129.6, 129.0, 128.8, 128.1, 127.9, 127.5, 127.0, 61.4, 46.0, 45.8, 21.6 ppm; IR (thin film): 2977, 1597, 1494, 1314, 1296, 1163, 1136, 1087, 933, 906, 809, 763, 739, 700, 680, 638  $\text{cm}^{-1}$ ; HRMS calculated for  $\text{C}_{22}\text{H}_{21}\text{ClO}_2\text{SNa}$  407.0843, found 407.0841  $[\text{M}+\text{Na}]^+$ .

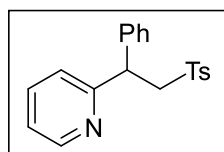

**2-(1-Phenyl-2-tosylethyl)pyridine (5ah):** The reaction was performed following the General Procedure with 2-vinylpyridine (10.8  $\mu$ L, 0.10 mmol), **2a** (40.4 mg, 0.20 mmol), **3a** (30.5 mg, 0.25 mmol),  $\text{KHCO}_3$  (25.0 mg, 0.25 mmol), CuI (1.9 mg, 10 mol %), dtbbpy (4.0 mg, 15 mol %) and  $\text{BzOO}^t\text{Bu}$  (57.1  $\mu$ L, 0.30 mmol). The crude product was purified by flash chromatography on silica gel (eluted with EtOAc:hexanes = 1:3) to give the product **5ah** (21.3 mg, 63% yield) as a colorless solid.  $R_f$  = 0.2 (EtOAc:hexanes = 1:3); m.p. = 113–116  $^\circ\text{C}$ ;  $^1\text{H}$  NMR (400 MHz,  $\text{CDCl}_3$ )  $\delta$  8.35 (d,  $J$  = 4.2 Hz, 1H), 7.55 (d,  $J$  = 8.2 Hz, 2H), 7.52 – 7.43 (m, 1H), 7.25 – 7.06 (m, 8H), 7.06 – 6.97 (m, 1H), 4.72 – 4.53 (m, 2H), 3.72 (dd,  $J$  = 14.2, 5.0 Hz, 1H), 2.36 (s, 3H) ppm;  $^{13}\text{C}$  NMR (100 MHz,  $\text{CDCl}_3$ )  $\delta$  159.6, 149.1, 144.0, 141.3, 136.9, 136.6, 129.4, 128.8, 128.0, 127.8, 127.1, 123.7, 121.7, 60.4, 47.7, 21.5 ppm; IR

(thin film): 2867, 2361, 1588, 1419, 1286, 1131, 925, 797, 778, 744, 701, 636  $\text{cm}^{-1}$ ; HRMS calculated for  $\text{C}_{20}\text{H}_{20}\text{NO}_2\text{S}$  338.1209, found 338.1204  $[\text{M}+\text{H}]^+$ .

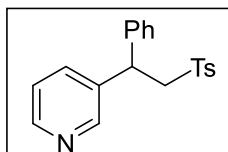

**3-(1-Phenyl-2-tosylethyl)pyridine (5ai):** The reaction was performed following the General Procedure with 3-vinylpyridine (10.7  $\mu\text{L}$ , 0.10 mmol), **2a** (40.4 mg, 0.20 mmol), **3a** (30.5 mg, 0.25 mmol),  $\text{KHCO}_3$  (25.0 mg, 0.25 mmol),  $\text{CuI}$  (1.9 mg, 10 mol %), dtbbpy (4.0 mg, 15 mol %) and  $\text{BzOO}^t\text{Bu}$  (57.1  $\mu\text{L}$ , 0.30 mmol). The crude product was purified by flash chromatography on silica gel (eluted with  $\text{EtOAc}:\text{hexanes} = 1:2$ ) to give the product **5ai** (17.5 mg, 52% yield) as a colorless solid.  $R_f = 0.2$  ( $\text{EtOAc}:\text{hexanes} = 1:3$ ); m.p. = 107–109  $^\circ\text{C}$ ;  $^1\text{H}$  NMR (400 MHz,  $\text{CDCl}_3$ )  $\delta$  8.44 (d,  $J = 14.7$  Hz, 2H), 7.55 (d,  $J = 8.2$  Hz, 2H), 7.47 (d,  $J = 7.9$  Hz, 1H), 7.25 – 7.05 (m, 8H), 4.63 (t,  $J = 7.1$  Hz, 1H), 3.95 – 3.81 (m, 2H), 2.38 (s, 3H) ppm;  $^{13}\text{C}$  NMR (100 MHz,  $\text{CDCl}_3$ )  $\delta$  149.2, 148.1, 144.7, 140.6, 136.3, 135.1, 129.8, 129.0, 128.0, 127.4, 127.3, 123.6, 60.9, 43.9, 21.6 ppm; IR (thin film): 1304, 1136, 1084, 746, 697  $\text{cm}^{-1}$ ; HRMS calculated for  $\text{C}_{20}\text{H}_{20}\text{NO}_2\text{S}$  338.1209, found 338.1206  $[\text{M}+\text{H}]^+$ .

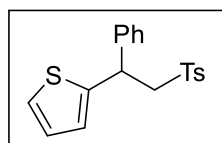

**2-(1-Phenyl-2-tosylethyl)thiophene (4al) (from 2-vinylthiophene):** The reaction was performed following the General Procedure with 2-vinylthiophene (10.5  $\mu\text{L}$ , 0.10 mmol), **2a** (40.4 mg, 0.20 mmol), **3a** (30.5 mg, 0.25 mmol),  $\text{KHCO}_3$  (25.0 mg, 0.25 mmol),  $\text{CuI}$  (1.9 mg, 10 mol %), dtbbpy (4.0 mg, 15 mol %) and  $\text{BzOO}^t\text{Bu}$  (57.1  $\mu\text{L}$ , 0.30 mmol). The crude product was purified by flash chromatography on silica gel (eluted with  $\text{EtOAc}:\text{hexanes} = 1:10$ ) to give the product **4al** (17.0 mg, 50% yield) as a colorless solid.  $R_f = 0.4$  ( $\text{EtOAc}:\text{hexanes} = 1:6$ ).

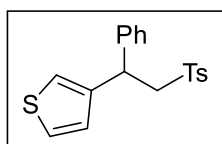

**3-(1-Phenyl-2-tosylethyl)thiophene (4am) (from 3-vinylthiophene):** The reaction was performed following the General Procedure with 3-vinylthiophene (11.0 mg, 0.10 mmol), **2a** (40.4 mg, 0.20 mmol), **3a** (30.5 mg, 0.25 mmol),  $\text{KHCO}_3$  (25.0 mg, 0.25 mmol),  $\text{CuI}$  (1.9 mg, 10 mol %), dtbbpy (4.0 mg, 15 mol %) and  $\text{BzOO}^t\text{Bu}$  (57.1  $\mu\text{L}$ , 0.30 mmol). The crude product was purified by flash chromatography on silica gel (eluted with  $\text{EtOAc}:\text{hexanes} = 1:10$ ) to give the product **4am** (22.0 mg, 64% yield) as a colorless solid.  $R_f = 0.4$  ( $\text{EtOAc}:\text{hexanes} = 1:6$ ).

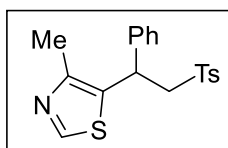

**4-Methyl-5-(1-phenyl-2-tosylethyl)thiazole (5aj):** The reaction was performed following the General Procedure with 4-methyl-5-vinylthiazole (11.5  $\mu\text{L}$ , 0.10 mmol), **2a** (40.4 mg, 0.20 mmol), **3a** (30.5 mg, 0.25 mmol),  $\text{KHCO}_3$  (25.0 mg, 0.25 mmol),  $\text{CuI}$  (1.9 mg, 10 mol %), dtbbpy (4.0 mg, 15 mol %) and  $\text{BzOO}^t\text{Bu}$  (57.1  $\mu\text{L}$ , 0.30 mmol). The crude product was purified by flash chromatography on silica gel (eluted with  $\text{EtOAc}:\text{hexanes} = 1:4$ ) to give the product **5aj** (21.4 mg, 60% yield) as a colorless solid.  $R_f = 0.3$  ( $\text{EtOAc}:\text{hexanes} = 1:6$ ); m.p. = 112–114  $^\circ\text{C}$ ;  $^1\text{H}$  NMR (400 MHz,  $\text{CDCl}_3$ )  $\delta$  8.49 (s, 1H), 7.56 (d,  $J = 8.2$  Hz, 2H),

7.34 – 7.13 (m, 7H), 4.95 (dd,  $J = 7.8, 6.3$  Hz, 1H), 3.92 – 3.75 (m, 2H), 2.48 (s, 3H), 2.40 (s, 3H) ppm;  $^{13}\text{C}$  NMR (100 MHz,  $\text{CDCl}_3$ )  $\delta$  150.4, 149.3, 144.6, 140.5, 136.4, 133.0, 129.7, 129.1, 127.9, 127.5, 127.2, 62.9, 38.9, 21.6, 15.4 ppm; IR (thin film): 2361, 1559, 1397, 1290, 1153, 1082, 877, 802, 780, 749, 705  $\text{cm}^{-1}$ ; HRMS calculated for  $\text{C}_{19}\text{H}_{20}\text{NO}_2\text{S}_2$  358.0930, found 358.0935  $[\text{M}+\text{H}]^+$ .

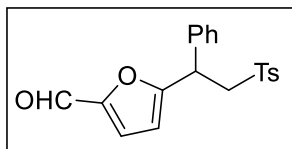

**5-(1-Phenyl-2-tosylethyl)furan-2-carbaldehyde (5ak):**

The reaction was performed following the General Procedure with 5-vinylfuran-2-carbaldehyde (12.2 mg, 0.10 mmol), **2a** (40.4 mg, 0.20 mmol), **3a** (30.5 mg, 0.25 mmol),  $\text{KHCO}_3$  (25.0 mg, 0.25 mmol),  $\text{CuI}$  (1.9 mg, 10 mol %), dtbbpy (4.0 mg, 15 mol %) and  $\text{BzOO}^t\text{Bu}$  (57.1  $\mu\text{L}$ , 0.30 mmol). The crude product was purified by flash chromatography on silica gel (eluted with  $\text{EtOAc}:\text{hexanes} = 1:4$ ) to give the product **5ak** (10.6 mg, 30% yield) as a colorless solid.  $R_f = 0.3$  ( $\text{EtOAc}:\text{hexanes} = 1:3$ ); m.p. = 95–97  $^\circ\text{C}$ ;  $^1\text{H}$  NMR (400 MHz,  $\text{CDCl}_3$ )  $\delta$  9.42 (s, 1H), 7.60 (d,  $J = 8.3$  Hz, 2H), 7.30 – 7.14 (m, 7H), 7.05 (d,  $J = 3.6$  Hz, 1H), 6.29 (d,  $J = 3.6$  Hz, 1H), 4.75 (dd,  $J = 9.0, 5.4$  Hz, 1H), 4.12 (dd,  $J = 14.5, 9.0$  Hz, 1H), 3.66 (dd,  $J = 14.5, 5.4$  Hz, 1H), 2.38 (s, 3H) ppm;  $^{13}\text{C}$  NMR (100 MHz,  $\text{CDCl}_3$ )  $\delta$  177.0, 159.8, 152.4, 144.7, 138.1, 136.2, 129.8, 129.2, 128.0, 127.6, 122.5, 110.4, 59.6, 40.7, 21.6 ppm; IR (thin film): 2980, 1679, 1511, 1297, 1135, 1084, 1024, 805, 751, 703  $\text{cm}^{-1}$ ; HRMS calculated for  $\text{C}_{20}\text{H}_{19}\text{O}_4\text{S}$  355.0999, found 355.0996  $[\text{M}+\text{H}]^+$ .

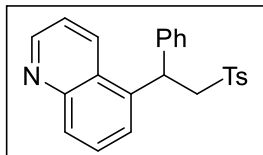

**5-(1-Phenyl-2-tosylethyl)quinolone (5al):** The reaction was performed following the General Procedure with 5-vinylquinoline (15.5 mg, 0.10 mmol), **2a** (40.4 mg, 0.20 mmol), **3a** (30.5 mg, 0.25 mmol),  $\text{KHCO}_3$  (25.0 mg, 0.25 mmol),  $\text{CuI}$  (1.9 mg, 10 mol %), dtbbpy (4.0 mg, 15 mol %) and  $\text{BzOO}^t\text{Bu}$  (57.1  $\mu\text{L}$ , 0.30 mmol). The crude product was purified by flash chromatography on silica gel (eluted with  $\text{EtOAc}:\text{hexanes} = 1:1$ ) to give the product **5al** (24.0 mg, 62% yield) as a colorless solid.  $R_f = 0.5$  ( $\text{EtOAc}:\text{hexanes} = 1:1$ ); m.p. = 170–172  $^\circ\text{C}$ ;  $^1\text{H}$  NMR (400 MHz,  $\text{CDCl}_3$ )  $\delta$  8.91 (d,  $J = 2.5$  Hz, 1H), 8.50 (d,  $J = 8.5$  Hz, 1H), 7.94 (d,  $J = 8.3$  Hz, 1H), 7.55 – 7.35 (m, 4H), 7.33 – 7.09 (m, 6H), 7.03 (d,  $J = 7.8$  Hz, 2H), 5.45 (t,  $J = 6.7$  Hz, 1H), 3.99 (d,  $J = 6.7$  Hz, 2H), 2.32 (s, 3H) ppm;  $^{13}\text{C}$  NMR (100 MHz,  $\text{CDCl}_3$ )  $\delta$  150.2, 148.8, 144.5, 140.6, 137.3, 136.3, 131.6, 129.5, 129.1, 128.9, 128.7, 127.9, 127.8, 127.2, 126.2, 125.5, 121.4, 61.5, 40.9, 21.5 ppm; IR (thin film): 2924, 1593, 1493, 1453, 1315, 1261, 1144, 984, 805, 775, 708, 661, 622  $\text{cm}^{-1}$ ; HRMS calculated for  $\text{C}_{24}\text{H}_{22}\text{NO}_2\text{S}$  388.1366, found 388.1365  $[\text{M}+\text{H}]^+$ .

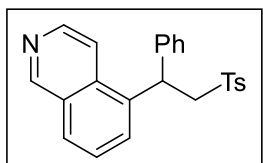

**5-(1-Phenyl-2-tosylethyl)isoquinoline (5am):** The reaction was performed following the General Procedure with 5-vinylisoquinoline (15.5 mg, 0.10 mmol), **2a** (40.4 mg, 0.20 mmol), **3a** (30.5 mg, 0.25 mmol),  $\text{KHCO}_3$  (25.0 mg, 0.25 mmol),  $\text{CuI}$  (1.9 mg, 10 mol %), dtbbpy (4.0 mg, 15 mol %) and  $\text{BzOO}^t\text{Bu}$  (57.1  $\mu\text{L}$ , 0.30 mmol). The crude product was purified by flash



chromatography on silica gel (eluted with EtOAc:hexanes = 1:1) to give the product **5am** (21.0 mg, 54% yield) as a colorless solid.  $R_f$  = 0.5 (EtOAc:hexanes = 1:1); m.p. = 164–167 °C;  $^1\text{H}$  NMR (400 MHz,  $\text{CDCl}_3$ )  $\delta$  9.20 (s, 1H), 8.54 (d,  $J$  = 5.5 Hz, 1H), 7.86 (d,  $J$  = 5.5 Hz, 1H), 7.83 – 7.73 (m, 1H), 7.49 (d,  $J$  = 7.8 Hz, 2H), 7.46 – 7.39 (m, 2H), 7.25 – 7.11 (m, 5H), 7.05 (d,  $J$  = 7.8 Hz, 2H), 5.39 (t,  $J$  = 6.5 Hz, 1H), 3.98 (d,  $J$  = 6.5 Hz, 2H), 2.33 (s, 3H);  $^{13}\text{C}$  NMR (100 MHz,  $\text{CDCl}_3$ )  $\delta$  153.4, 144.5, 143.8, 140.3, 136.4, 136.2, 133.8, 130.2, 129.5, 129.2, 128.9, 128.0, 127.9, 127.3, 127.2, 126.6, 116.1, 61.1, 41.0, 21.5 ppm; IR (thin film): 1496, 1316, 1146, 1087, 985, 776, 708, 661, 621  $\text{cm}^{-1}$ ; HRMS calculated for  $\text{C}_{24}\text{H}_{22}\text{NO}_2\text{S}$  388.1366, found 388.1364  $[\text{M}+\text{H}]^+$ .

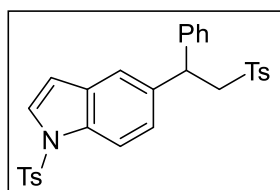

**5-(1-Phenyl-2-tosylethyl)-1-tosyl-1H-indole (5an):** The reaction was performed following the General Procedure with 1-tosyl-5-vinyl-1H-indole (29.7  $\mu\text{L}$ , 0.10 mmol), **2a** (40.4 mg, 0.20 mmol), **3a** (30.5 mg, 0.25 mmol),  $\text{KHCO}_3$  (25.0 mg, 0.25 mmol),  $\text{CuI}$  (1.9 mg, 10 mol %), dtbbpy (4.0 mg, 15 mol %) and  $\text{BzOO}^t\text{Bu}$  (57.1  $\mu\text{L}$ , 0.30 mmol). The crude product was purified by flash chromatography on silica gel (eluted with EtOAc:hexanes = 1:2) to give the product **5an** (34.0 mg, 64% yield) as a colorless solid.  $R_f$  = 0.2 (EtOAc:hexanes = 1:3); m.p. = 182–185 °C;  $^1\text{H}$  NMR (400 MHz,  $\text{CDCl}_3$ )  $\delta$  7.78 – 7.71 (m, 3H), 7.50 (d,  $J$  = 3.7 Hz, 1H), 7.40 (d,  $J$  = 8.3 Hz, 2H), 7.25 – 7.09 (m, 8H), 7.06 (dd,  $J$  = 8.6, 1.7 Hz, 1H), 6.91 (d,  $J$  = 8.0 Hz, 2H), 6.47 – 6.44 (m, 1H), 4.66 (t,  $J$  = 7.2 Hz, 1H), 3.98 – 3.82 (m, 2H), 2.33 (s, 3H), 2.24 (s, 3H) ppm;  $^{13}\text{C}$  NMR (100 MHz,  $\text{CDCl}_3$ )  $\delta$  145.1, 144.2, 141.8, 136.5, 136.2, 135.3, 133.5, 130.9, 130.0, 129.3, 128.8, 127.9, 127.5, 126.9, 126.6, 124.6, 120.2, 113.7, 108.7, 61.8, 46.2, 21.6, 21.4 ppm; IR (thin film): 2360, 2341, 1457, 1367, 1290, 1172, 1126, 996, 807, 761, 727, 702, 670  $\text{cm}^{-1}$ ; HRMS calculated for  $\text{C}_{30}\text{H}_{28}\text{NO}_4\text{S}_2$  530.1454, found 530.1450  $[\text{M}+\text{H}]^+$ .

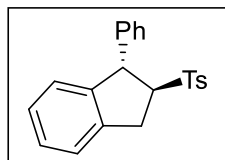

**(1S,2S)-1-Phenyl-2-tosyl-2,3-dihydro-1H-indene (5ao):** The reaction was performed following the General Procedure with 1H-indene (18.3  $\mu\text{L}$ , 0.10 mmol), **2a** (40.4 mg, 0.20 mmol), **3a** (30.5 mg, 0.25 mmol),  $\text{KHCO}_3$  (25.0 mg, 0.25 mmol),  $\text{CuI}$  (1.9 mg, 10 mol %), dtbbpy (4.0 mg, 15 mol %) and  $\text{BzOO}^t\text{Bu}$  (57.1  $\mu\text{L}$ , 0.30 mmol). The crude product was purified by flash chromatography on silica gel (eluted with EtOAc:hexanes = 1:15) to give the product **5ao** (14.6 mg, 42% yield) as a colorless solid.  $R_f$  = 0.5 (EtOAc:hexanes = 1:6); m.p. = 124–128 °C;  $^1\text{H}$  NMR (400 MHz,  $\text{CDCl}_3$ )  $\delta$  7.70 (d,  $J$  = 8.3 Hz, 2H), 7.25 – 7.08 (m, 8H), 6.94 – 6.88 (m, 2H), 6.82 (d,  $J$  = 7.6 Hz, 1H), 4.84 (d,  $J$  = 6.6 Hz, 1H), 4.07 – 3.98 (m, 1H), 3.64 – 3.53 (m, 1H), 3.44 – 3.31 (m, 1H), 2.39 (s, 3H) ppm;  $^{13}\text{C}$  NMR (100 MHz,  $\text{CDCl}_3$ )  $\delta$  144.6, 143.8, 142.7, 139.4, 135.3, 129.7, 128.7, 128.6, 128.1, 127.6, 127.5, 126.9, 125.2, 124.2, 71.6, 52.4, 33.1, 21.6 ppm; IR (thin film): 2920, 2361, 1596, 1454, 1419, 1287, 1144, 815, 782, 755, 699, 670, 631  $\text{cm}^{-1}$ ; HRMS calculated for  $\text{C}_{22}\text{H}_{21}\text{O}_2\text{S}$  349.1257, found 349.1255  $[\text{M}+\text{H}]^+$ .

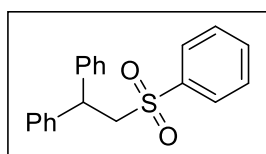

**(2-(Phenylsulfonyl)ethane-1,1-diyl)dibenzene (6aa):** The reaction was performed following the General Procedure with **1a** (18.3  $\mu$ L, 0.10 mmol), *S*-methyl-benzenesulfonylthioate (37.6 mg, 0.20 mmol), **3a** (30.5 mg, 0.25 mmol),  $\text{KHCO}_3$  (25.0 mg, 0.25 mmol), CuI (1.9 mg, 10 mol %), dtbbpy (4.0 mg, 15 mol %) and  $\text{BzOO}^t\text{Bu}$  (57.1  $\mu$ L, 0.30 mmol). The crude product was purified by flash chromatography on silica gel (eluted with EtOAc:hexanes = 1:12) to give the product **6aa** (22.5 mg, 70% yield) as a colorless solid.  $R_f$  = 0.5 (EtOAc:hexanes = 1:6);  $^1\text{H}$  NMR (400 MHz,  $\text{CDCl}_3$ )  $\delta$  7.67 – 7.61 (m, 2H), 7.51 – 7.44 (m, 1H), 7.37 – 7.29 (m, 2H), 7.23 – 7.09 (m, 10H), 4.63 (t,  $J$  = 7.1 Hz, 1H), 3.92 (d,  $J$  = 7.1 Hz, 2H) ppm;  $^{13}\text{C}$  NMR (100 MHz,  $\text{CDCl}_3$ )  $\delta$  141.4, 139.6, 133.3, 128.9, 128.8, 128.0, 127.6, 127.0, 61.5, 46.2 ppm. IR (thin film): 2927, 2362, 1736, 1494, 1448, 1306, 1295, 1135, 779, 684, 630  $\text{cm}^{-1}$ ; HRMS calculated for  $\text{C}_{20}\text{H}_{18}\text{O}_2\text{S}$  323.1100, found 323.1098  $[\text{M}+\text{H}]^+$ . Other spectroscopic data were previously reported.<sup>4</sup>

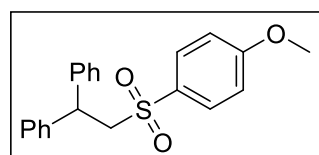

**(2-((4-Methoxyphenyl)sulfonyl)ethane-1,1-diyl)dibenzene (6ab):** The reaction was performed following the General Procedure with **1a** (11.6  $\mu$ L, 0.10 mmol), *S*-methyl 4-methoxybenzenesulfonylthioate (43.6 mg, 0.20 mmol), **3a** (30.5 mg, 0.25 mmol),  $\text{KHCO}_3$  (25.0 mg, 0.25 mmol), CuI (1.9 mg, 10 mol %), dtbbpy (4.0 mg, 15 mol %) and  $\text{BzOO}^t\text{Bu}$  (57.1  $\mu$ L, 0.30 mmol). The crude product was purified by flash chromatography on silica gel (eluted with EtOAc:hexanes = 1:8) to give the product **6ab** (26.8 mg, 76% yield) as a colorless solid.  $R_f$  = 0.3 (EtOAc:hexanes = 1:6); m.p. = 124–126  $^\circ\text{C}$ ;  $^1\text{H}$  NMR (400 MHz,  $\text{CDCl}_3$ )  $\delta$  7.55 (d,  $J$  = 8.9 Hz, 2H), 7.24 – 7.05 (m, 10H), 6.77 (d,  $J$  = 8.9 Hz, 2H), 4.60 (t,  $J$  = 7.1 Hz, 1H), 3.88 (d,  $J$  = 7.1 Hz, 2H), 3.82 (s, 3H) ppm;  $^{13}\text{C}$  NMR (100 MHz,  $\text{CDCl}_3$ )  $\delta$  163.4, 141.5, 131.1, 130.2, 128.7, 127.6, 126.9, 114.1, 61.7, 55.6, 46.3 ppm; IR (thin film): 1594, 1497, 1296, 1254, 1161, 1136, 1084, 1015, 934, 904, 804, 743, 701  $\text{cm}^{-1}$ ; HRMS calculated for  $\text{C}_{21}\text{H}_{21}\text{O}_3\text{S}$  353.1206, found 353.1205  $[\text{M}+\text{H}]^+$ .

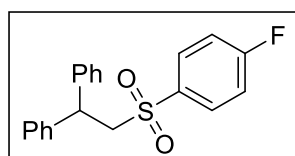

**(2-((4-Fluorophenyl)sulfonyl)ethane-1,1-diyl)dibenzene (6ac):** The reaction was performed following the General Procedure with **1a** (11.6  $\mu$ L, 0.10 mmol), *S*-methyl 4-fluorobenzenesulfonylthioate (41.2 mg, 0.20 mmol), **3a** (30.5 mg, 0.25 mmol),  $\text{KHCO}_3$  (25.0 mg, 0.25 mmol), CuI (1.9 mg, 10 mol %), dtbbpy (4.0 mg, 15 mol %) and  $\text{BzOO}^t\text{Bu}$  (57.1  $\mu$ L, 0.30 mmol). The crude product was purified by flash chromatography on silica gel (eluted with EtOAc:hexanes = 1:8) to give the product **6ac** (24.8 mg, 73% yield) as a colorless solid.  $R_f$  = 0.4 (EtOAc:hexanes = 1:6); m.p. = 150–153  $^\circ\text{C}$ ;  $^1\text{H}$  NMR (400 MHz,  $\text{CDCl}_3$ )  $\delta$  7.66 – 7.56 (m, 2H), 7.23 – 7.04 (m, 10H), 7.03 – 6.89 (m, 2H), 4.62 (t,  $J$  = 7.2 Hz, 1H), 3.92 (d,  $J$  = 7.2 Hz, 2H) ppm;  $^{13}\text{C}$  NMR (100 MHz,  $\text{CDCl}_3$ )  $\delta$  165.4 (d,  $J_{\text{C-F}}$  = 256.3 Hz), 141.1, 135.6 (d,  $J_{\text{C-F}}$  = 3.1 Hz), 130.8 (d,  $J_{\text{C-F}}$  = 9.7 Hz), 128.8, 127.6, 127.1, 116.1 (d,  $J_{\text{C-F}}$  = 22.7 Hz), 61.7, 46.4 ppm; IR (thin film): 1591, 1492, 1311, 1289, 1237, 1153,

1085, 834, 770, 704, 636  $\text{cm}^{-1}$ ; HRMS calculated for  $\text{C}_{20}\text{H}_{18}\text{FO}_2\text{S}$  341.1006, found 341.1003  $[\text{M}+\text{H}]^+$ .

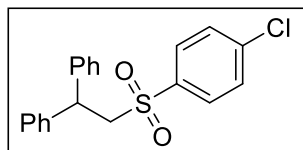

**(2-((4-Chlorophenyl)sulfonyl)ethane-1,1-diyl)dibenzene**

**(6ad):** The reaction was performed following the General Procedure with **1a** (11.6  $\mu\text{L}$ , 0.10 mmol), *S*-methyl 4-chlorobenzenesulfonothioate (44.4 mg, 0.20 mmol), **3a**

(30.5 mg, 0.25 mmol),  $\text{KHCO}_3$  (25.0 mg, 0.25 mmol),  $\text{CuI}$  (1.9 mg, 10 mol %), dtbbpy (4.0 mg, 15 mol %) and  $\text{BzOO}^t\text{Bu}$  (57.1  $\mu\text{L}$ , 0.30 mmol). The crude product was purified by flash chromatography on silica gel (eluted with  $\text{EtOAc}:\text{hexanes} = 1:12$ ) to give the product **6ad** (21.6 mg, 70% yield) as a colorless solid.  $R_f = 0.5$  ( $\text{EtOAc}:\text{hexanes} = 1:6$ ); m.p. = 160–163  $^\circ\text{C}$ ;  $^1\text{H}$  NMR (400 MHz,  $\text{CDCl}_3$ )  $\delta$  7.53 – 7.48 (m, 2H), 7.27 – 7.23 (m, 2H), 7.22 – 7.08 (m, 10H), 4.61 (t,  $J = 7.2$  Hz, 1H), 3.92 (d,  $J = 7.2$  Hz, 2H) ppm;  $^{13}\text{C}$  NMR (100 MHz,  $\text{CDCl}_3$ )  $\delta$  141.1, 140.0, 138.0, 129.5, 129.1, 128.8, 127.6, 127.1, 61.6, 46.3 ppm; IR (thin film): 2973, 1582, 1493, 1454, 1399, 1308, 1277, 1161, 1138, 1088, 923, 905, 818, 780, 747, 704  $\text{cm}^{-1}$ ; HRMS calculated for  $\text{C}_{20}\text{H}_{17}\text{ClO}_2\text{SNa}$  379.0530, found 379.0531  $[\text{M}+\text{Na}]^+$ .

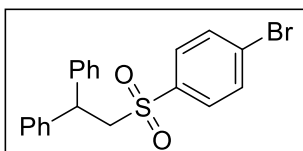

**(2-((4-Bromophenyl)sulfonyl)ethane-1,1-diyl)dibenzene**

**(6ae):** The reaction was performed following the General Procedure with **1a** (11.6  $\mu\text{L}$ , 0.10 mmol), *S*-methyl 4-bromobenzenesulfonothioate (53.2 mg, 0.20 mmol), **3a**

(30.5 mg, 0.25 mmol),  $\text{KHCO}_3$  (25.0 mg, 0.25 mmol),  $\text{CuI}$  (1.9 mg, 10 mol %), dtbbpy (4.0 mg, 15 mol %) and  $\text{BzOO}^t\text{Bu}$  (57.1  $\mu\text{L}$ , 0.30 mmol). The crude product was purified by flash chromatography on silica gel (eluted with  $\text{EtOAc}:\text{hexanes} = 1:10$ ) to give the product **6ae** (20.5 mg, 51% yield) as a colorless solid.  $R_f = 0.5$  ( $\text{EtOAc}:\text{hexanes} = 1:6$ ); m.p. = 160–162  $^\circ\text{C}$ ;  $^1\text{H}$  NMR (400 MHz,  $\text{CDCl}_3$ )  $\delta$  7.45 – 7.39 (m, 4H), 7.23 – 7.06 (m, 10H), 4.61 (t,  $J = 7.2$  Hz, 1H), 3.91 (d,  $J = 7.2$  Hz, 2H) ppm;  $^{13}\text{C}$  NMR (100 MHz,  $\text{CDCl}_3$ )  $\delta$  141.0, 138.5, 132.1, 129.5, 128.8, 128.6, 127.6, 127.1, 61.6, 46.3 ppm; IR (thin film): 1574, 1493, 1308, 1163, 1138, 1085, 906, 816, 777, 747, 704  $\text{cm}^{-1}$ ; HRMS calculated for  $\text{C}_{20}\text{H}_{17}\text{BrO}_2\text{SNa}$  423.0025, found 423.0021  $[\text{M}+\text{Na}]^+$ .

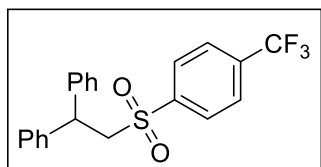

**(2-((4-(Trifluoromethyl)phenyl)sulfonyl)ethane-1,1-diyl)dibenzene**

**(6af):** The reaction was performed following the General Procedure with **1a** (11.6  $\mu\text{L}$ , 0.10 mmol), *S*-methyl 4-(trifluoromethyl)benzenesulfonothioate (51.2 mg, 0.20 mmol), **3a** (30.5 mg, 0.25 mmol),  $\text{KHCO}_3$  (25.0

mg, 0.25 mmol),  $\text{CuI}$  (1.9 mg, 10 mol %), dtbbpy (4.0 mg, 15 mol %) and  $\text{BzOO}^t\text{Bu}$  (57.1  $\mu\text{L}$ , 0.30 mmol). The crude product was purified by flash chromatography on silica gel (eluted with  $\text{EtOAc}:\text{hexanes} = 1:10$ ) to give the product **6af** (28.6 mg, 73% yield) as a colorless solid.  $R_f = 0.5$  ( $\text{EtOAc}:\text{hexanes} = 1:6$ ); m.p. = 133–136  $^\circ\text{C}$ ;  $^1\text{H}$  NMR (400 MHz,  $\text{CDCl}_3$ )  $\delta$  7.68 (d,  $J = 8.3$  Hz, 2H), 7.51 (d,  $J = 8.3$  Hz, 2H), 7.20 – 7.03 (m, 10H), 4.63 (t,  $J = 7.3$  Hz, 1H), 3.96 (d,  $J = 7.3$  Hz, 2H) ppm;  $^{13}\text{C}$  NMR (100

MHz, CDCl<sub>3</sub>)  $\delta$  143.0, 140.8, 134.7 (q,  $J_{C-F}$  = 33.2 Hz), 128.8, 128.6, 127.6, 127.2, 125.9 (q,  $J_{C-F}$  = 3.7 Hz), 123.1 (q,  $J_{C-F}$  = 273.1 Hz), 61.5, 46.4 ppm; IR (thin film): 1404, 1322, 1164, 1126, 1088, 1061, 905, 835, 791, 764, 744, 702 cm<sup>-1</sup>; HRMS calculated for C<sub>21</sub>H<sub>17</sub>F<sub>3</sub>O<sub>2</sub>SNa 413.0794, found 413.0792 [M+Na]<sup>+</sup>.

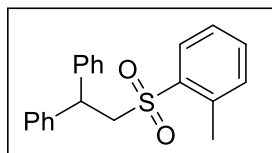

**(2-(*o*-Tolylsulfonyl)ethane-1,1-diyl)dibenzene (6ag):** The reaction was performed following the General Procedure with **1a** (11.6  $\mu$ L, 0.10 mmol), *S*-methyl 2-methylbenzenesulfonothioate 40.4 mg, 0.20 mmol), **3a** (30.5 mg, 0.25 mmol), KHCO<sub>3</sub> (25.0 mg, 0.25 mmol), CuI (1.9 mg, 10 mol %), dtbbpy (4.0 mg, 15 mol %) and BzOO<sup>t</sup>Bu (57.1  $\mu$ L, 0.30 mmol). The crude product was purified by flash chromatography on silica gel (eluted with EtOAc:hexanes = 1:12) to give the product **6ag** (25.3 mg, 75% yield) as a colorless solid.  $R_f$  = 0.5 (EtOAc:hexanes = 1:6); m.p. = 130–133 °C; <sup>1</sup>H NMR (400 MHz, CDCl<sub>3</sub>)  $\delta$  7.75 – 7.67 (m, 1H), 7.41 – 7.30 (m, 1H), 7.22 – 7.06 (m, 12H), 4.60 (t,  $J$  = 7.0 Hz, 1H), 3.94 (d,  $J$  = 7.0 Hz, 2H), 2.60 (s, 3H) ppm; <sup>13</sup>C NMR (100 MHz, CDCl<sub>3</sub>)  $\delta$  141.4, 137.6, 137.5, 133.4, 132.4, 130.3, 128.7, 127.5, 127.0, 126.4, 60.6, 46.1, 20.4 ppm; IR (thin film): 1494, 1455, 1304, 1159, 1125, 1081, 1057, 920, 904, 771, 745, 702 cm<sup>-1</sup>; HRMS calculated for C<sub>21</sub>H<sub>21</sub>O<sub>2</sub>S 337.1257, found 337.1253 [M+H]<sup>+</sup>.

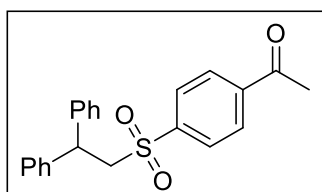

**1-(4-((2,2-Diphenylethyl)sulfonyl)phenyl)ethan-1-one (6ah):** The reaction was performed following the General Procedure with **1a** (11.6  $\mu$ L, 0.10 mmol), *S*-methyl 4-acetylbenzenesulfonothioate (46.0 mg, 0.20 mmol), **3a** (30.5 mg, 0.25 mmol), KHCO<sub>3</sub> (25.0 mg, 0.25 mmol), CuI (1.9 mg, 10 mol %), dtbbpy (4.0 mg, 15 mol %) and BzOO<sup>t</sup>Bu (57.1  $\mu$ L, 0.30 mmol). The crude product was purified by flash chromatography on silica gel (eluted with EtOAc:hexanes = 1: 3) to give the product **6ah** (21.8 mg, 60% yield) as a colorless solid.  $R_f$  = 0.4 (EtOAc:hexanes = 1:3); m.p. = 139–141 °C; <sup>1</sup>H NMR (400 MHz, CDCl<sub>3</sub>)  $\delta$  7.84 (d,  $J$  = 8.5 Hz, 2H), 7.69 (d,  $J$  = 8.5 Hz, 2H), 7.22 – 7.08 (m, 10H), 4.64 (t,  $J$  = 7.2 Hz, 1H), 3.95 (d,  $J$  = 7.2 Hz, 2H), 2.62 (s, 3H) ppm; <sup>13</sup>C NMR (100 MHz, CDCl<sub>3</sub>)  $\delta$  196.7, 143.3, 141.0, 140.3, 128.8, 128.5, 128.4, 127.6, 127.1, 61.5, 46.3, 26.9 ppm; IR (thin film): 1683, 1295, 1259, 1135, 1086, 784, 746, 702, 617 cm<sup>-1</sup>; HRMS calculated for C<sub>22</sub>H<sub>20</sub>O<sub>3</sub>SNa 387.1025, found 387.1023 [M+Na]<sup>+</sup>.

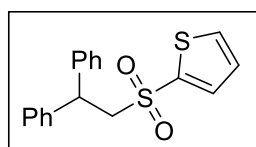

**2-((2,2-Diphenylethyl)sulfonyl)thiophene (6ai):** The reaction was performed following the General Procedure with **1a** (11.6  $\mu$ L, 0.10 mmol), *S*-methyl thiophene-2-sulfonothioate (38.8 mg, 0.20 mmol), **3a** (30.5 mg, 0.25 mmol), KHCO<sub>3</sub> (25.0 mg, 0.25 mmol), CuI (1.9 mg, 10 mol %), dtbbpy (4.0 mg, 15 mol %) and BzOO<sup>t</sup>Bu (57.1  $\mu$ L, 0.30 mmol). The crude product was purified by flash chromatography on silica gel (eluted with EtOAc:hexanes = 1:8) to give the product **6ai** (20.3 mg, 62% yield) as a colorless solid.  $R_f$  = 0.4 (EtOAc:hexanes = 1:6); m.p. = 152–154 °C; <sup>1</sup>H NMR (400 MHz, CDCl<sub>3</sub>)  $\delta$  7.54 (dd,  $J$  = 5.0, 1.3 Hz, 1H), 7.32 (dd,  $J$  = 3.8, 1.3 Hz, 1H), 7.25 –

7.12 (m, 10H), 6.89 (dd,  $J = 5.0, 3.8$  Hz, 1H), 4.67 (t,  $J = 7.1$  Hz, 1H), 4.02 (d,  $J = 7.1$  Hz, 2H) ppm;  $^{13}\text{C}$  NMR (100 MHz,  $\text{CDCl}_3$ )  $\delta$  141.4, 140.6, 134.4, 133.9, 128.8, 127.7, 127.6, 127.0, 62.8, 46.4 ppm; IR (thin film): 1598, 1494, 1452, 1403, 1307, 1230, 1132, 1091, 1022, 905, 791, 768, 739, 724, 703, 629  $\text{cm}^{-1}$ ; HRMS calculated for  $\text{C}_{18}\text{H}_{16}\text{O}_2\text{S}_2\text{Na}$  351.0484, found 351.0482  $[\text{M}+\text{Na}]^+$ .

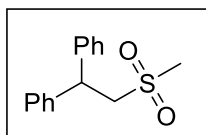

**(2-(Methylsulfonyl)ethane-1,1-diyl)dibenzene (6aj):** The reaction was performed following the General Procedure with **1a** (11.6  $\mu\text{L}$ , 0.10 mmol), *S*-methyl-methanesulfonylthioate (25.2 mg, 0.20 mmol), **3a** (30.5 mg, 0.25 mmol),  $\text{KHCO}_3$  (25.0 mg, 0.25 mmol),  $\text{CuI}$  (1.9 mg, 10 mol %), dtbbpy (4.0 mg, 15 mol %) and  $\text{BzOO}^t\text{Bu}$  (57.1  $\mu\text{L}$ , 0.30 mmol). The crude product was purified by flash chromatography on silica gel (eluted with  $\text{EtOAc}:\text{hexanes} = 1:2$ ) to give the product **6aj** (13.0 mg, 50% yield) as a colorless solid.  $R_f = 0.3$  ( $\text{EtOAc}:\text{hexanes} = 1:2$ ); m.p. = 101–105  $^\circ\text{C}$ ;  $^1\text{H}$  NMR (400 MHz,  $\text{CDCl}_3$ )  $\delta$  7.38 – 7.30 (m, 8H), 7.28 – 7.22 (m, 2H), 4.67 (t,  $J = 7.3$  Hz, 1H), 3.78 (d,  $J = 7.3$  Hz, 2H), 2.30 (s, 3H) ppm;  $^{13}\text{C}$  NMR (100 MHz,  $\text{CDCl}_3$ )  $\delta$  141.5, 129.2, 127.7, 127.5, 60.9, 46.3, 42.0 ppm; IR (thin film): 3648, 2160, 1473, 1419, 1397, 650  $\text{cm}^{-1}$ ; HRMS calculated for  $\text{C}_{15}\text{H}_{16}\text{O}_2\text{SNa}$  283.0763, found 283.0762  $[\text{M}+\text{Na}]^+$ .

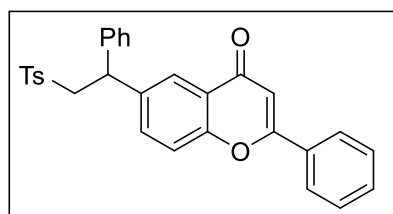

**3-Phenyl-6-(1-phenyl-2-tosylethyl)-4H-chromen-4-one (5ap):** The reaction was performed following the General Procedure with 3-phenyl-6-vinyl-4H-chromen-4-one (24.8  $\mu\text{L}$ , 0.10 mmol), **2a** (40.4 mg, 0.20 mmol), **3a** (30.5 mg, 0.25 mmol),  $\text{KHCO}_3$  (25.0 mg, 0.25 mmol),  $\text{CuI}$  (1.9 mg, 10 mol %), dtbbpy (4.0 mg, 15 mol %) and  $\text{BzOO}^t\text{Bu}$  (57.1  $\mu\text{L}$ , 0.30 mmol). The crude product was purified by flash chromatography on silica gel (eluted with  $\text{EtOAc}:\text{hexanes} = 1:3$ ) to give the product **5ap** (19.4 mg, 40% yield) as a colorless solid.  $R_f = 0.2$  ( $\text{EtOAc}:\text{hexanes} = 1:3$ ); m.p. = 192–194  $^\circ\text{C}$ ;  $^1\text{H}$  NMR (400 MHz,  $\text{CDCl}_3$ )  $\delta$  7.93 – 7.86 (m, 3H), 7.59 – 7.49 (m, 6H), 7.44 (d,  $J = 8.6$  Hz, 1H), 7.26 – 7.09 (m, 7H), 6.79 (s, 1H), 4.73 (dd,  $J = 8.3, 6.1$  Hz, 1H), 4.04 (dd,  $J = 14.5, 8.5$  Hz, 1H), 3.89 (dd,  $J = 14.5, 6.0$  Hz, 1H), 2.30 (s, 3H);  $^{13}\text{C}$  NMR (100 MHz,  $\text{CDCl}_3$ )  $\delta$  178.0, 163.5, 155.1, 144.4, 141.1, 138.6, 136.5, 134.1, 131.8, 131.6, 129.6, 129.1, 129.0, 128.0, 127.5, 127.3, 126.3, 123.8, 123.6, 118.6, 107.4, 61.2, 45.8, 21.5 ppm; IR (thin film): 1650, 1452, 1397, 1287, 1134, 1085, 900, 868, 811, 772, 704, 685  $\text{cm}^{-1}$ ; HRMS calculated for  $\text{C}_{30}\text{H}_{25}\text{O}_4\text{S}$  481.1468, found 481.1467  $[\text{M}+\text{H}]^+$ .

**(8*R*,9*S*,13*S*,14*S*)-13-Methyl-3-(1-phenyl-2-tosylethyl)-6,7,8,9,11,12,13,14,15,16-decahydro-17*H*-cyclopenta[*a*]phenanthren-17-one (5aq):** The reaction was performed following the General Procedure with (8*R*,9*S*,13*S*,14*S*)-13-methyl-3-vinyl-6,7,8,9,11,12,13,14,15,16-decahydro-17*H*-cyclopenta[*a*]phenanthren-17-one (28.0 mg, 0.10 mmol), **2a** (40.4 mg, 0.20 mmol), **3a** (30.5 mg, 0.25 mmol),  $\text{KHCO}_3$  (25.0 mg, 0.25 mmol),  $\text{CuI}$  (1.9 mg, 10 mol %), dtbbpy (4.0 mg, 15 mol %)

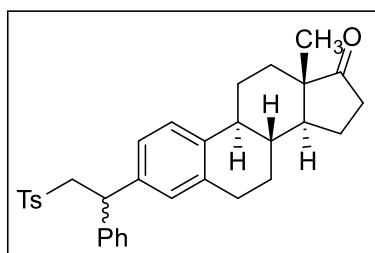

and BzOO<sup>t</sup>Bu (57.1  $\mu$ L, 0.30 mmol). The crude product was purified by flash chromatography on silica gel (eluted with EtOAc:hexanes = 1:3) to give the product **5aq** (26.6 mg, 52% yield, dr = 1:1) as a colorless solid.  $R_f$  = 0.3 (EtOAc:hexanes = 1:3);  $^1\text{H}$  NMR (400 MHz,  $\text{CDCl}_3$ )  $\delta$  7.50 (dd,  $J$  = 8.3, 2.3 Hz, 2H), 7.22 – 7.04 (m, 8H), 6.94 – 6.89 (m, 1H), 6.81 (s, 1H), 4.56 – 4.50 (m, 1H), 3.88 (d,  $J$  = 7.2 Hz, 2H), 2.86 – 2.64 (m, 2H), 2.49 (dd,  $J$  = 18.8, 8.6 Hz, 1H), 2.40 – 2.30 (m, 4H), 2.24 – 2.16 (m, 1H), 2.12 (dd,  $J$  = 18.8, 9.0 Hz, 1H), 2.06 – 1.92 (m, 3H), 1.66 – 1.55 (m, 1H), 1.53 – 1.42 (m, 4H), 1.38 – 1.29 (m, 1H), 0.89 (s, 3H) ppm;  $^{13}\text{C}$  NMR (100 MHz,  $\text{CDCl}_3$ )  $\delta$  220.8, 144.0, 141.6, 138.9, 138.8, 138.4, 136.8, 136.7, 129.4, 128.7, 128.2, 128.1, 128.0, 127.6, 126.8, 125.7, 125.6, 125.0, 124.9, 61.6, 50.5, 48.0, 45.9, 44.3, 38.1, 38.0, 35.9, 31.6, 29.4, 26.5, 25.7, 21.7, 21.6, 13.9 ppm; IR (thin film): 2925, 2360, 1735, 1598, 1495, 1453, 1298, 1085, 1007, 813, 756, 699, 642  $\text{cm}^{-1}$ ; HRMS calculated for  $\text{C}_{33}\text{H}_{37}\text{O}_3\text{S}$  513.2458, found 513.2457  $[\text{M}+\text{H}]^+$ .

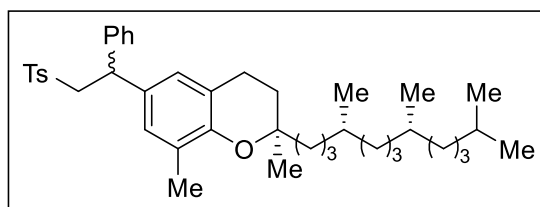

**(2R)-2,8-Dimethyl-6-(1-phenyl-2-tosylethyl)-2-((4R,8R)-4,8,12-trimethyltridecyl)chromane (5ar)**: The reaction was performed following the General Procedure with (*R*)-2,8-dimethyl-2-((4*R*,8*R*)-4,8,12-trimethyltridecyl)-6-vinylchromane (41.2  $\mu$ L, 0.10 mmol), **2a** (40.4 mg, 0.20 mmol), **3a** (30.5 mg, 0.25 mmol),  $\text{KHCO}_3$  (25.0 mg, 0.25 mmol), CuI (1.9 mg, 10 mol %), dtbbpy (4.0 mg, 15 mol %) and BzOO<sup>t</sup>Bu (57.1  $\mu$ L, 0.30 mmol). The crude product was purified by flash chromatography on silica gel (eluted with EtOAc:hexanes = 1:15) to give the product **5ar** (27.0 mg, 42% yield, dr = 1:1) as a colorless oil.  $R_f$  = 0.6 (EtOAc:hexanes = 1:6);  $^1\text{H}$  NMR (400 MHz,  $\text{CDCl}_3$ )  $\delta$  7.46 (d,  $J$  = 8.2 Hz, 2H), 7.22 – 7.04 (m, 7H), 6.60 – 6.58 (m, 2H), 4.45 (t,  $J$  = 7.2 Hz, 1H), 3.92 – 3.78 (m, 2H), 2.69 – 2.48 (m, 2H), 2.35 (s, 3H), 1.98 (d,  $J$  = 4.1 Hz, 3H), 1.78 – 1.62 (m, 2H), 1.57 – 1.47 (m, 3H), 1.38 – 1.33 (m, 3H), 1.29 – 1.22 (m, 6H), 1.20 (d,  $J$  = 6.1 Hz, 4H), 1.16 – 1.10 (m, 3H), 1.08 – 1.03 (m, 3H), 0.91 – 0.80 (m, 14H) ppm;  $^{13}\text{C}$  NMR (100 MHz,  $\text{CDCl}_3$ )  $\delta$  151.0, 143.8, 142.3, 136.8, 131.2, 131.1, 129.2, 128.6, 128.0, 127.5, 127.4, 127.3, 126.6, 126.3, 126.1, 126.0, 120.3, 120.2, 75.9, 75.8, 62.0, 61.9, 45.7, 40.5, 40.4, 39.4, 37.5, 37.3, 32.8, 32.7, 31.0, 28.0, 24.8, 24.5, 24.2, 24.1, 22.8, 22.7, 22.3, 21.6, 21.0, 20.9, 19.8, 19.7, 16.1 ppm; IR (thin film): 2924, 2361, 1599, 1455, 1377, 1299, 1228, 1149, 1134, 1086, 872, 812, 754, 699, 653  $\text{cm}^{-1}$ ; HRMS calculated for  $\text{C}_{42}\text{H}_{60}\text{O}_3\text{SNa}$  667.4155, found 667.4153  $[\text{M}+\text{Na}]^+$ .

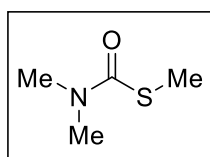

**S-Methyl dimethylcarbamothioate (11a)**: The reaction was performed following the General Procedure with **1a** (11.6  $\mu$ L, 0.10 mmol), **2a** (40.4 mg, 0.20 mmol), **3a** (30.5 mg, 0.25 mmol),  $\text{KHCO}_3$  (25.0 mg, 0.25 mmol), CuI (1.9 mg, 10 mol %), dtbbpy

(4.0 mg, 15 mol %) and BzOO<sup>t</sup>Bu (57.1  $\mu$ L, 0.30 mmol). **11a** was obtained in 72% assay yield (determined by <sup>1</sup>H NMR analysis of the crude reaction mixtures using 0.1 mmol CH<sub>2</sub>Br<sub>2</sub> as internal standard). The crude product was purified by flash chromatography on silica gel (eluted with EtOAc:hexanes = 1:2) to give the product **11a** (14.2 mg, 60% yield) as a colorless oil. <sup>1</sup>H NMR (400 MHz, CDCl<sub>3</sub>)  $\delta$  3.01 (s, 6H), 2.33 (s, 3H) ppm; <sup>13</sup>C NMR (100 MHz, CDCl<sub>3</sub>)  $\delta$  168.8, 36.6, 13.1 ppm. Other spectroscopic data were previously reported.<sup>5</sup>

## 5. Mechanism Study

### 1) Typical procedure for radical trapping with TEMPO

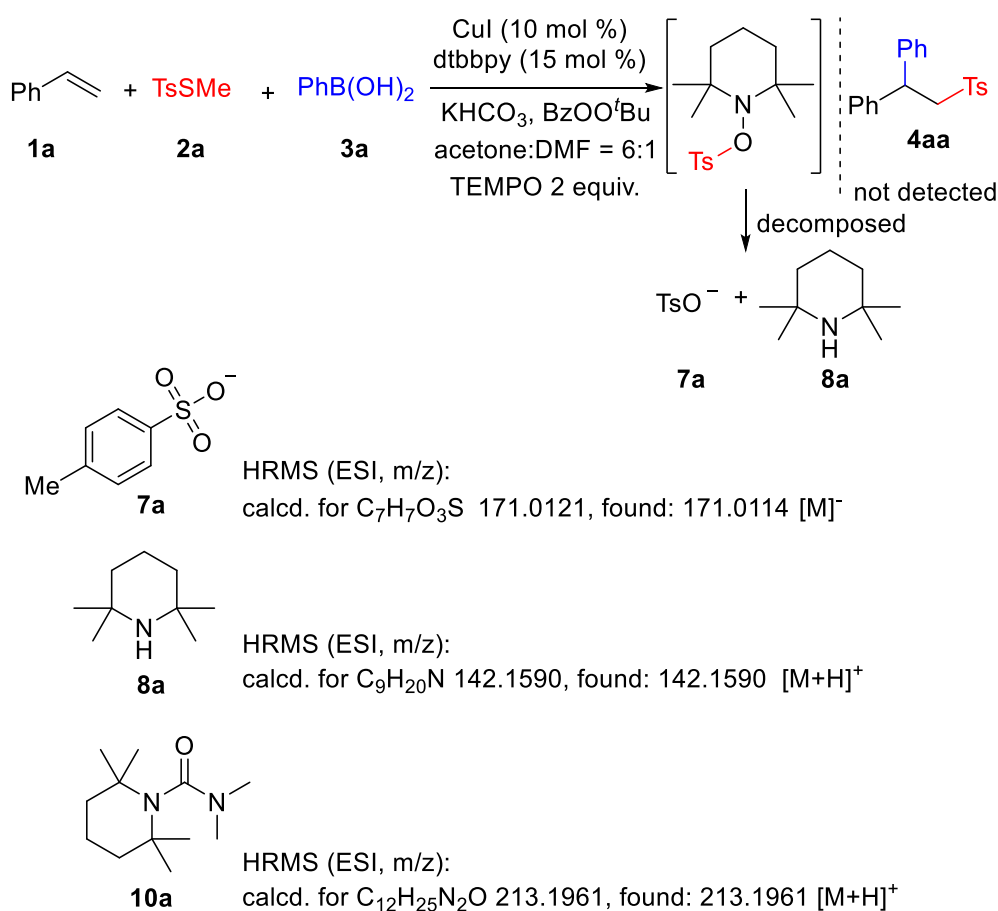

### Scheme S1: Radical trapping with TEMPO

To an oven-dried microwave vial equipped with a stir bar was added *S*-methyl 4-methylbenzenesulfonothioate (**2a**) (40.4 mg, 0.20 mmol), phenylboronic acid (**3a**) (30.5 mg, 0.25 mmol), TEMPO (32.2 mg, 0.2 mmol), KHCO<sub>3</sub> (25.0 mg, 0.25 mmol), CuI (1.9 mg, 10 mol %), dtbbpy (4.0 mg, 15 mol %) under an argon atmosphere in a glove box. A mix solvent of acetone (0.6 mL) and DMF (0.1 mL) was added to the vial by syringe. The microwave vial was sealed with a cap and removed from the glove box. Then, styrene (**1a**) (11.6  $\mu$ L, 0.10 mmol) and BzOO<sup>t</sup>Bu (57.1  $\mu$ L, 0.30 mmol) were added by syringe under an argon atmosphere. The reaction mixture was heated to 40 °C in an oil bath and stirred for 12 h. Upon completion of the reaction, the sealed vial was cooled to room temperature, and opened to air. No product **4aa**

was detected by  $^1\text{H}$  NMR.

## 2) Investigation of methyl thiosulfonate in the standard reaction

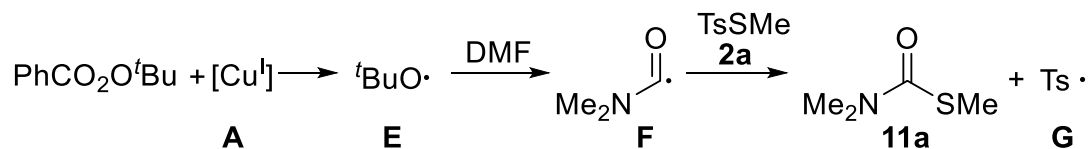

**Scheme S2: Complementary mechanism**

To an oven-dried microwave vial equipped with a stir bar was added **2a** (40.4 mg, 0.20 mmol), **3a** (30.5 mg, 0.25 mmol),  $\text{KHCO}_3$  (25.0 mg, 0.25 mmol), CuI (1.9 mg, 10 mol %), dtbbpy (4.0 mg, 15 mol %) under an argon atmosphere in a glove box. A mix solvent of acetone (0.6 mL) and DMF (0.1 mL) was added to the vial by syringe. The microwave vial was sealed with a cap and removed from the glove box. Then, **1a** (11.6  $\mu\text{L}$ , 0.10 mmol) and  $\text{BzOO}^t\text{Bu}$  (57.1  $\mu\text{L}$ , 0.30 mmol) were added by syringe under argon atmosphere. The reaction mixture was heated to 40  $^\circ\text{C}$  in an oil bath and stirred for 12 h. The resulting solution was subjected to reduced pressure to remove the volatile materials. **11a** was obtained in 72% assay yield (determined by  $^1\text{H}$  NMR analysis of the crude reaction mixtures using 0.1 mmol  $\text{CH}_2\text{Br}_2$  as internal standard). The relevant literature supports this reaction process.<sup>6</sup> Radical **F** can be trapped by TEMPO in radical trapping experiments.

## 3) UV/Vis-Absorption Spectra of the Reaction Components

**Preparation of the samples for UV-Vis spectra measurement.** (*All the samples were used freshly for UV-Vis spectra measurement.*)

**Copper complexes:** To an oven-dried microwave vial equipped with a stir bar was added CuI (1.9 mg) and dtbbpy (4.0 mg) under an argon atmosphere in a glove box. A mix solvent (1 mL, acetone:DMF = 6:1) was added to the vial by syringe. After stirring for 10 minutes, the solution (120  $\mu\text{L}$ ) was diluted with mix solvent (3.5 mL, acetone:DMF = 6:1). The diluted solution was immediately transferred into a cuvette by syringe, and it was capped and removed from the glove box. Measurement of solution in the colorimetric vessel by UV was conducted.

**Copper complexes and  $\text{BzOO}^t\text{Bu}$ :** To an oven-dried microwave vial equipped with a stir bar was added CuI (1.9 mg) and dtbbpy (4.0 mg) under an argon atmosphere in a glove box. A mix solvent of acetone (1.2 mL) and DMF (0.2 mL) was added to the vial by syringe. After stirring for 10 minutes,  $\text{BzOO}^t\text{Bu}$  (57.1  $\mu\text{L}$ ) was added to the solution under argon atmosphere. The solution was immediately transferred into a cuvette by syringe, and it was capped and removed from the glove box. Measurement of the resulting solution by UV was conducted.

**Reaction solution:** To an oven-dried microwave vial equipped with a stir bar was added *S*-methyl 4-methylbenzenesulfonothioate (**2a**) (40.4 mg, 0.20 mmol), phenylboronic acid (**3a**) (30.5 mg, 0.25 mmol),  $\text{KHCO}_3$  (25.0 mg, 0.25 mmol), CuI (1.9 mg), dtbbpy (4.0 mg, 15 mol %) under an argon atmosphere in a glove box. A mix solvent of acetone (0.6 mL) and DMF (0.1 mL) was added to the vial by syringe.



The microwave vial was sealed and removed from the glove box. Then, styrene (**1a**) (11.6  $\mu$ L, 0.10 mmol) and BzOO<sup>t</sup>Bu (57.1  $\mu$ L, 0.30 mmol) were added by syringe under an argon atmosphere. The reaction mixture was heated to 40 °C in an oil bath and stirred for 6 h. The reaction solution was transferred into a cuvette by syringe under an argon atmosphere, and then a mix solvent of acetone (0.6 mL) and DMF (0.1 mL) was added under argon. Measurement of the solution in colorimetric vessel by UV was conducted.

#### 4) EPR Studies with DMPO

**Typical procedure for EPR studies:** To an oven-dried microwave vial equipped with a stir bar was added *S*-methyl-4-methylbenzenesulfonothioate (**2a**) (40.4 mg, 0.20 mmol), phenylboronic acid (**3a**) (30.5 mg, 0.25 mmol), KHCO<sub>3</sub> (25.0 mg, 0.25 mmol), CuI (1.9 mg, 10 mol %), dtbbpy (4.0 mg, 15 mol %) under an argon atmosphere in a glove box. A mix solvent of acetone (0.6 mL) and DMF (0.1 mL) was added to the vial by syringe. The microwave vial was sealed and removed from the glove box. Then, styrene (**1a**) (11.6  $\mu$ L, 0.10 mmol) and BzOO<sup>t</sup>Bu (57.1  $\mu$ L, 0.30 mmol) were added by syringe under an argon atmosphere. The reaction was stirred at 40 °C for 1 h. Then, DMPO (5,5-dimethyl-1-pyrroline *N*-oxide, 22.6 mg, 0.20 mmol) was added by syringe under an argon atmosphere. After stirring for an additional 10 minutes, the reaction mixture was immediately analyzed by electron paramagnetic resonance (EPR). The EPR spectrum was recorded at room temperature. We hypothesized that sulfonyl radicals were generated in the reaction by DMPO capturing. We did data fitting and HRMS analysis, which further confirmed our hypothesis. EPR spectrometer operated at 9.843461 GHz. Typical spectrometer parameters were: scan range: 200 G; center field set: 3502.60 G; scan time: 20.48 s; modulation amplitude: 1.0 G; modulation frequency: 100.00 kHz. The fitting data are  $A_N = 13.60$  G,  $A_H = 9.31$  G. The existence of **9a** was further established by HRMS. HRMS calculated for C<sub>13</sub>H<sub>18</sub>NO<sub>3</sub>S 268.1007, found 268.1004 [M]<sup>+</sup>.

#### 5) EPR Studies of Cu(II)

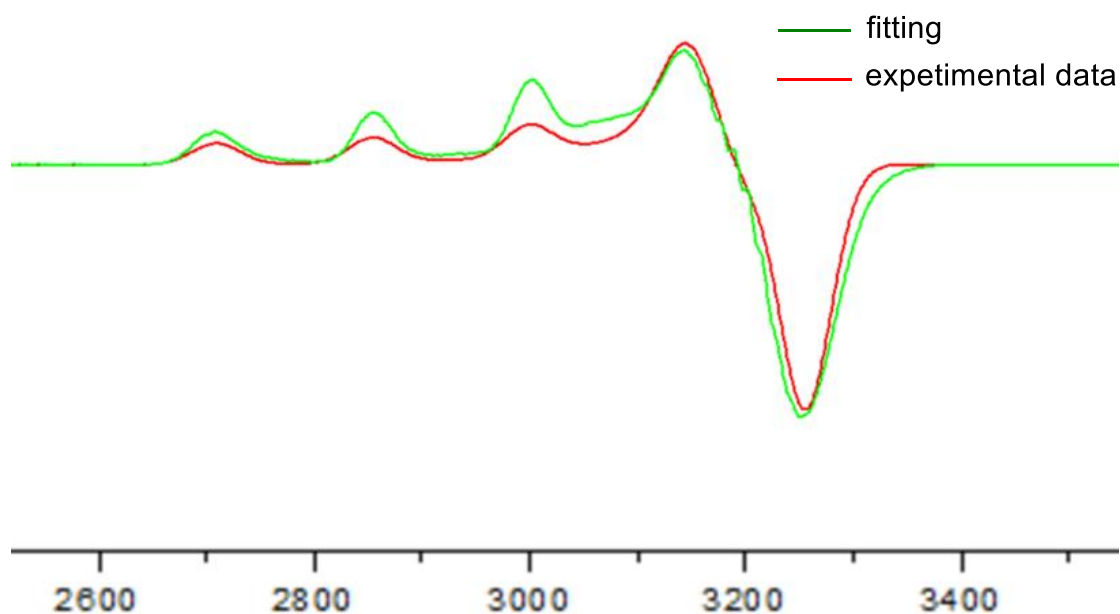

**Figure S1.** EPR spectra of Cu(II) (the fitting data and experimental data)

**Typical procedure for EPR studies:** To an oven-dried microwave vial equipped with a stir bar was added CuI (1.9 mg) and dtbbpy (4.0 mg) under argon atmosphere in a glove box. A mix solvent of acetone (1.2 mL) and DMF (0.2 mL) was added to the vial by syringe. After stirring for 10 minutes, BzOO<sup>t</sup>Bu (57.1  $\mu$ L) was added to the solution under argon atmosphere. The mixture was analyzed by electron paramagnetic resonance (EPR) immediately. EPR spectrum was recorded at -173  $^{\circ}$ C. We did data fitting and further confirmed the Cu(II). EPR spectrometer operated at 9.300692 GHz. Typical spectrometer parameters are shown as follows, scan range: 200 G; center field set: 2900 G; scan time: 140 s; modulation amplitude: 1.0 G; modulation frequency: 100.00 kHz.

## 6. References

- (1) Bulman Page, P. C.; Goodyear, R. L.; Horton, A. E.; Chan, Y.; Karim, R.; O'Connell, M. A.; Hamilton, C.; Slawin, A. M. Z.; Buckley, B. R.; Allin, S. M. Formal Total Synthesis of (+)-C9-Deoxyomuralide from L-Leucine Using a Double Sacrificial Chirality Transfer Approach. *J. Org. Chem.* **2017**, 82, 12209-12223.
- (2) Ranu, B. C.; Guchhait, S. K.; Ghosh, K. Chemoselective Hydrogenation of  $\alpha,\beta$ -Unsaturated Sulfones and Phosphonates via Palladium-Assisted Hydrogen Transfer by Ammonium Formate. *J. Org. Chem.* **1998**, 63, 5250-5251.
- (3) Lin, Y.-S.; Kuo, Y.-C.; Kuei, C.-H.; Chang, M.-Y. Palladium-Mediated Synthesis of 1,1,2-Triarylethanes. Application to the Synthesis of CDP-840. *Tetrahedron* **2017**, 73, 1275-1282.
- (4) Field, L.; Holsten, J. R.; Clark, R. D. Grignard Reagents of Sulfones. VI. Alkylation and Related Reactions. *J. Am. Chem. Soc.* **1959**, 81, 2572-2578.
- (5) Pontes, R. M.; Basso, E. A.; dos Santos, F. P. Medium Effect on the Rotational Barrier of Carbamates and Its Sulfur Congeners. *J. Org. Chem.* **2007**, 72, 1901-1911.
- (6) Xiang, J.-n.; Yuan, Y.-q.; Guo, S.-r. Cu(OAc)<sub>2</sub>-Catalyzed Thiolation of Acyl C-H Bonds with Thiols Using TBHP as An Oxidant. *Synlett* **2013**, 24, 443-448.

## 7. NMR Spectra

<sup>1</sup>H NMR (CDCl<sub>3</sub>, 400 MHz) of (2-Tosylethane-1,1-diyl)dibenzene (4aa)

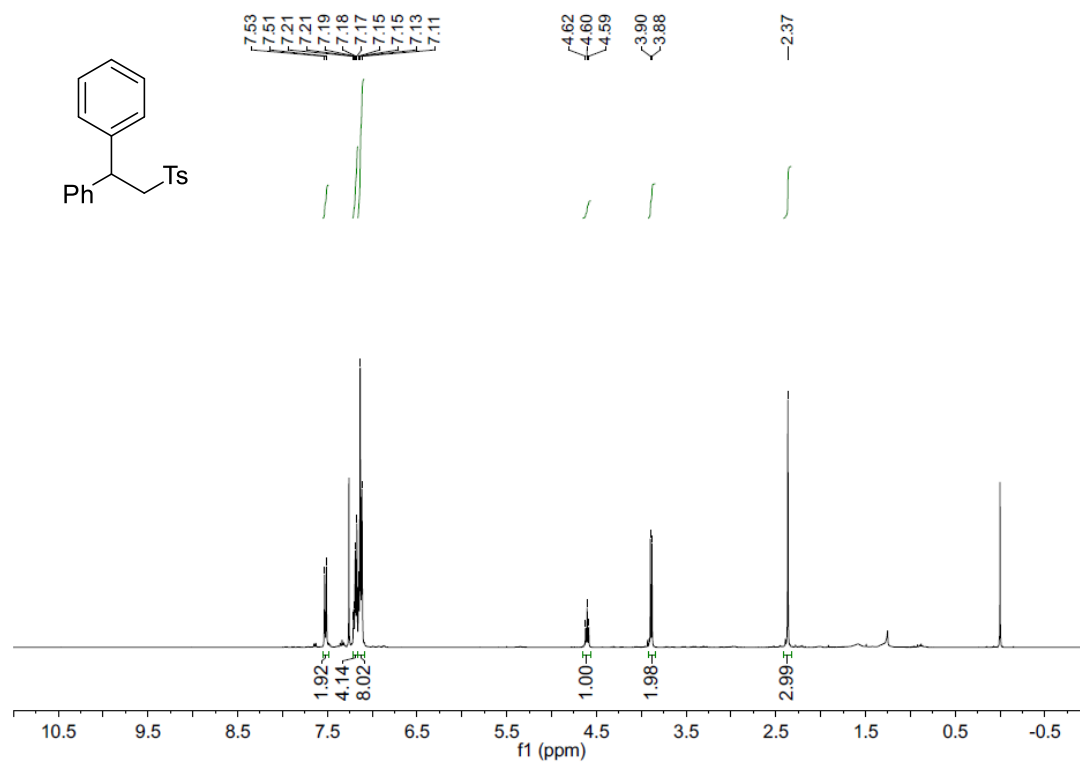

<sup>13</sup>C NMR (CDCl<sub>3</sub>, 100 MHz) of (2-Tosylethane-1,1-diyl)dibenzene (4aa)

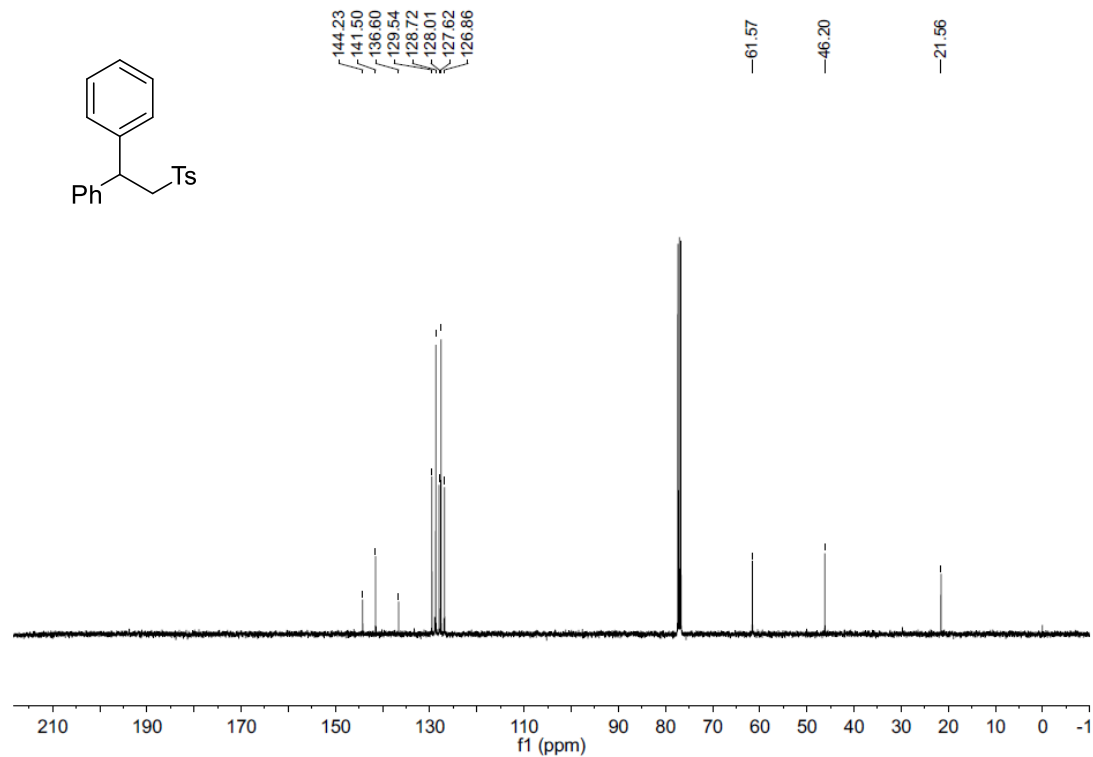

**$^1\text{H}$  NMR ( $\text{CDCl}_3$ , 400 MHz) of 1-Fluoro-4-(1-phenyl-2-tosylethyl)benzene (4ab)**

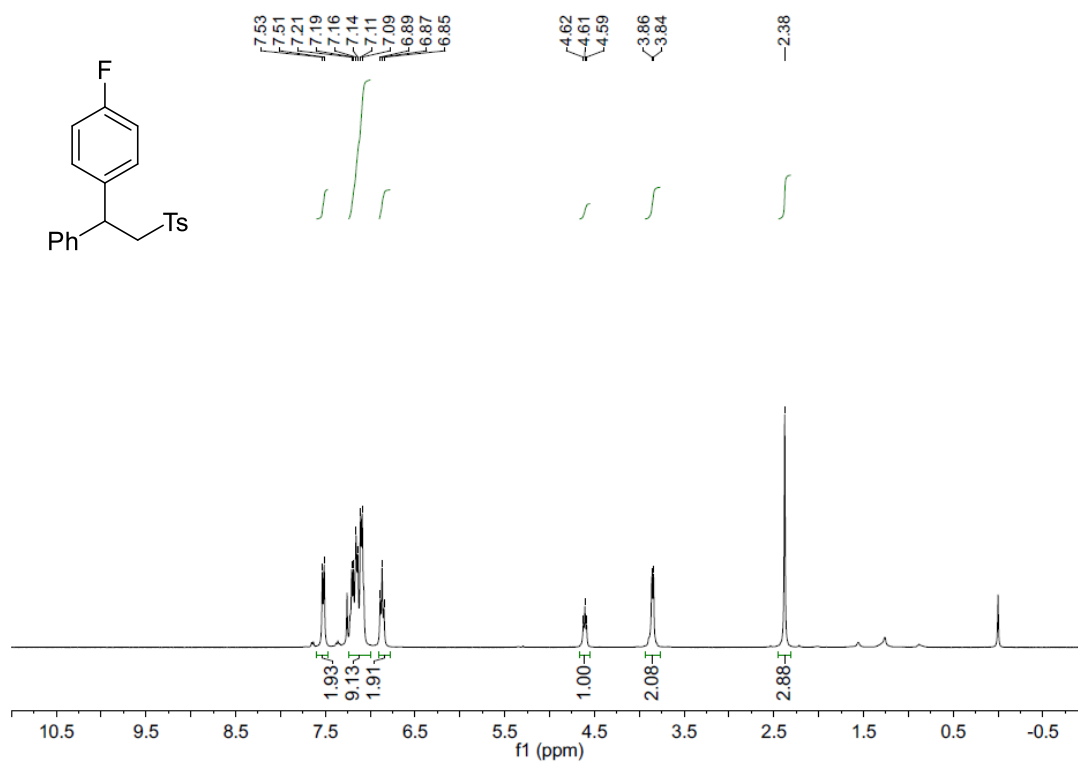

**$^{13}\text{C}$  NMR ( $\text{CDCl}_3$ , 100 MHz) of 1-Fluoro-4-(1-phenyl-2-tosylethyl)benzene (4ab)**

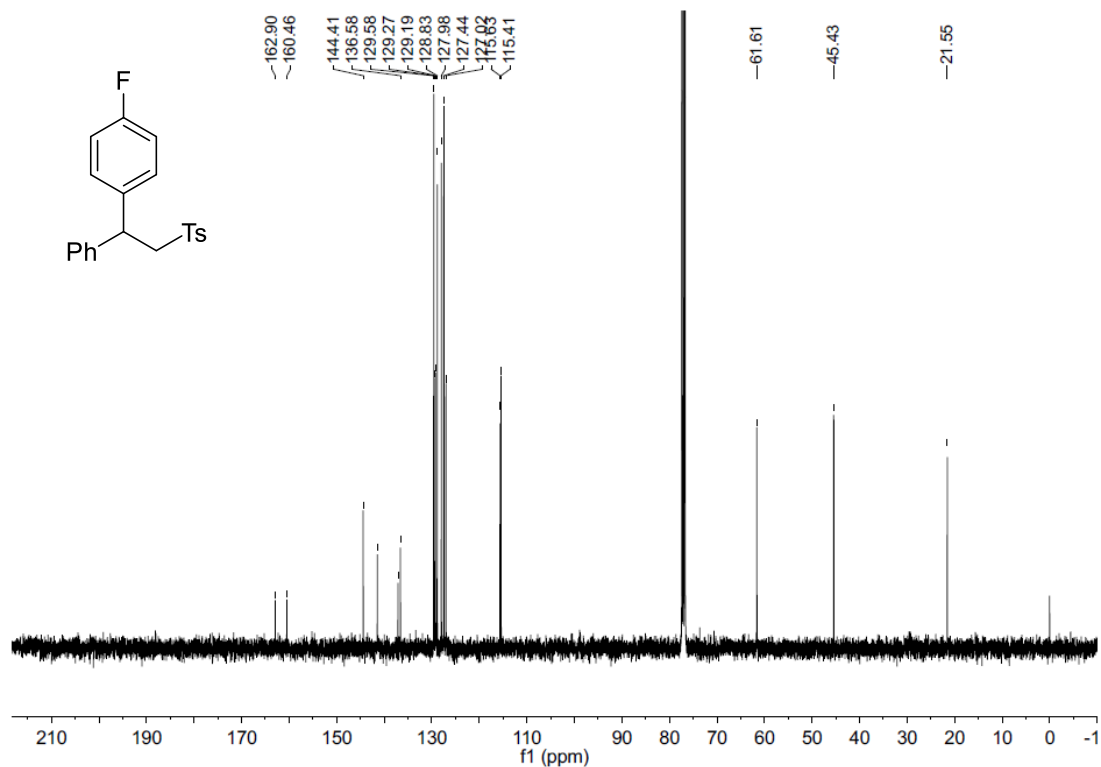

**$^1\text{H}$  NMR ( $\text{CDCl}_3$ , 400 MHz) of 1-Chloro-4-(1-phenyl-2-tosylethyl)benzene (4ac)**

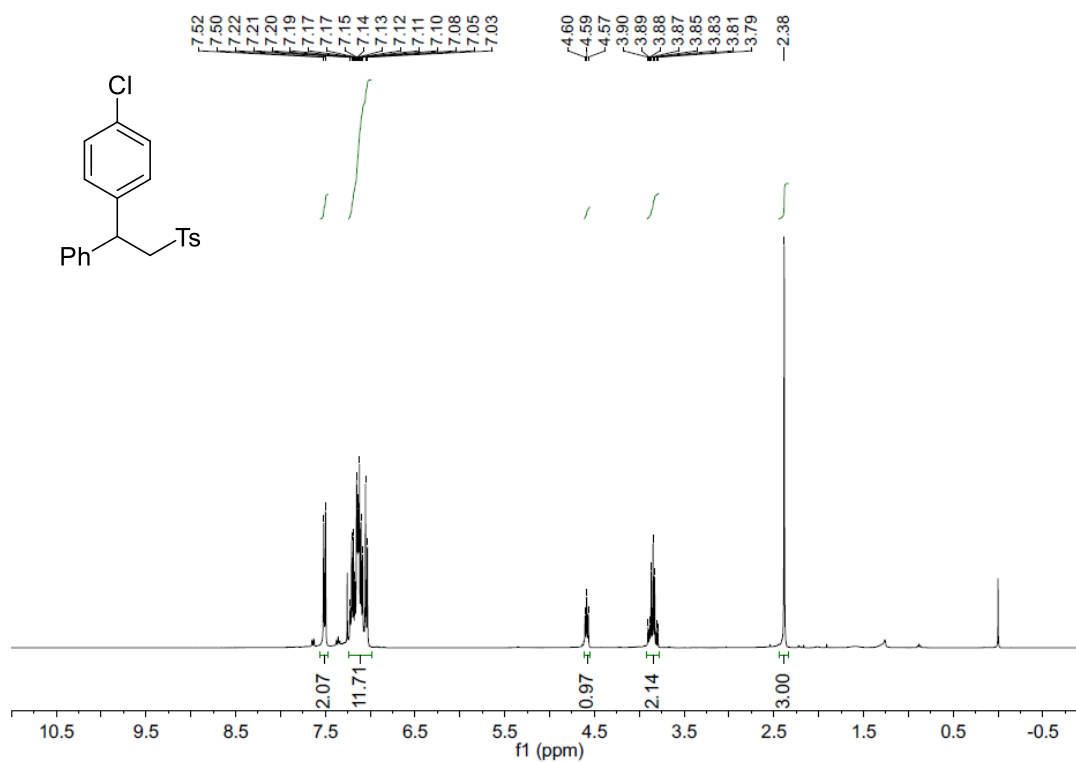

**$^{13}\text{C}$  NMR ( $\text{CDCl}_3$ , 100 MHz) of 1-Chloro-4-(1-phenyl-2-tosylethyl)benzene (4ac)**

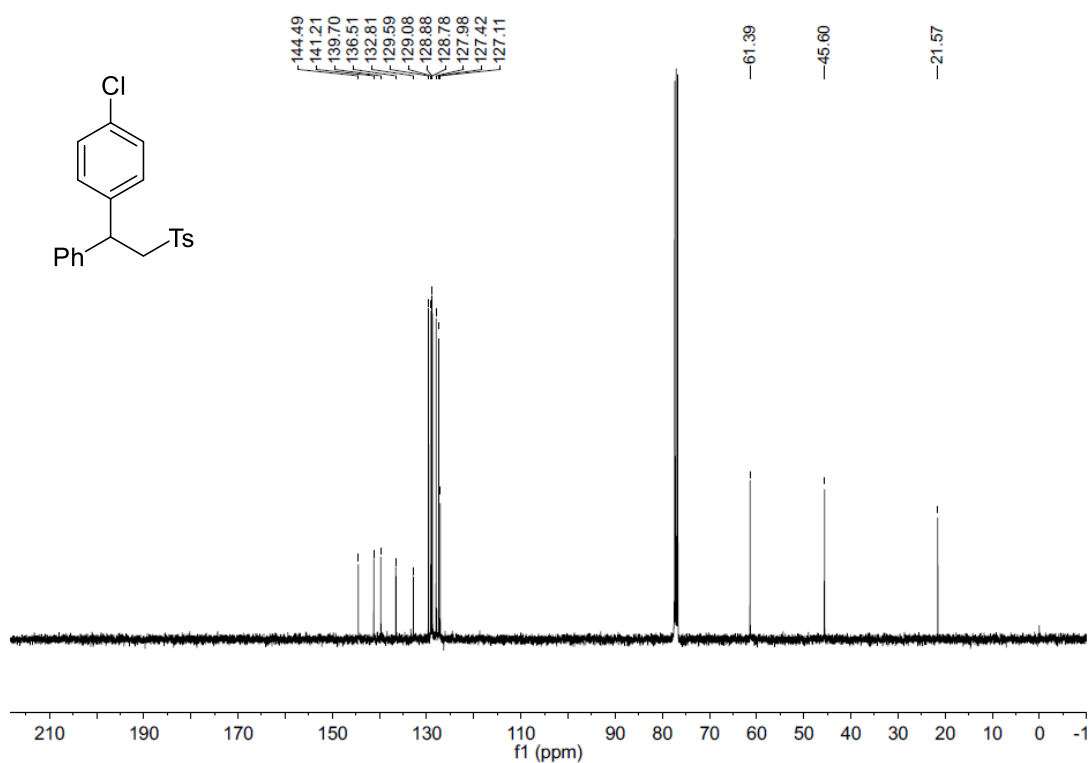

**$^1\text{H}$  NMR ( $\text{CDCl}_3$ , 400 MHz) of 1-Bromo-4-(1-phenyl-2-tosylethyl)benzene (4ad)**

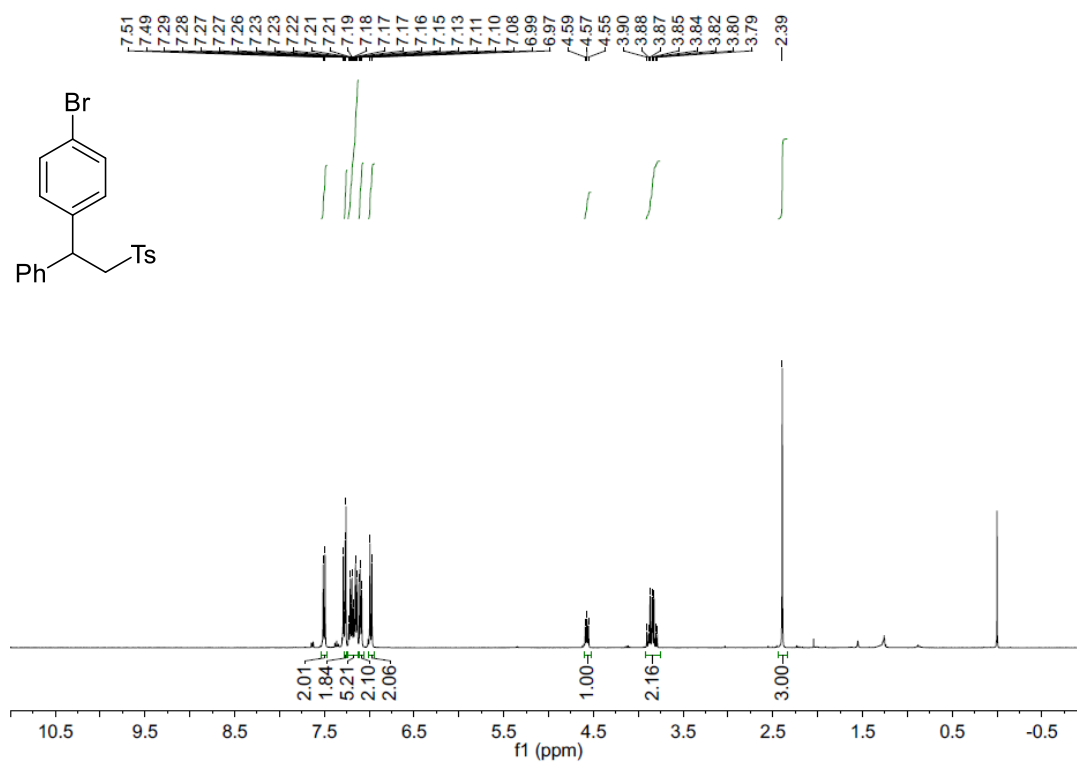

**$^{13}\text{C}$  NMR ( $\text{CDCl}_3$ , 100 MHz) of 1-Bromo-4-(1-phenyl-2-tosylethyl)benzene (4ad)**

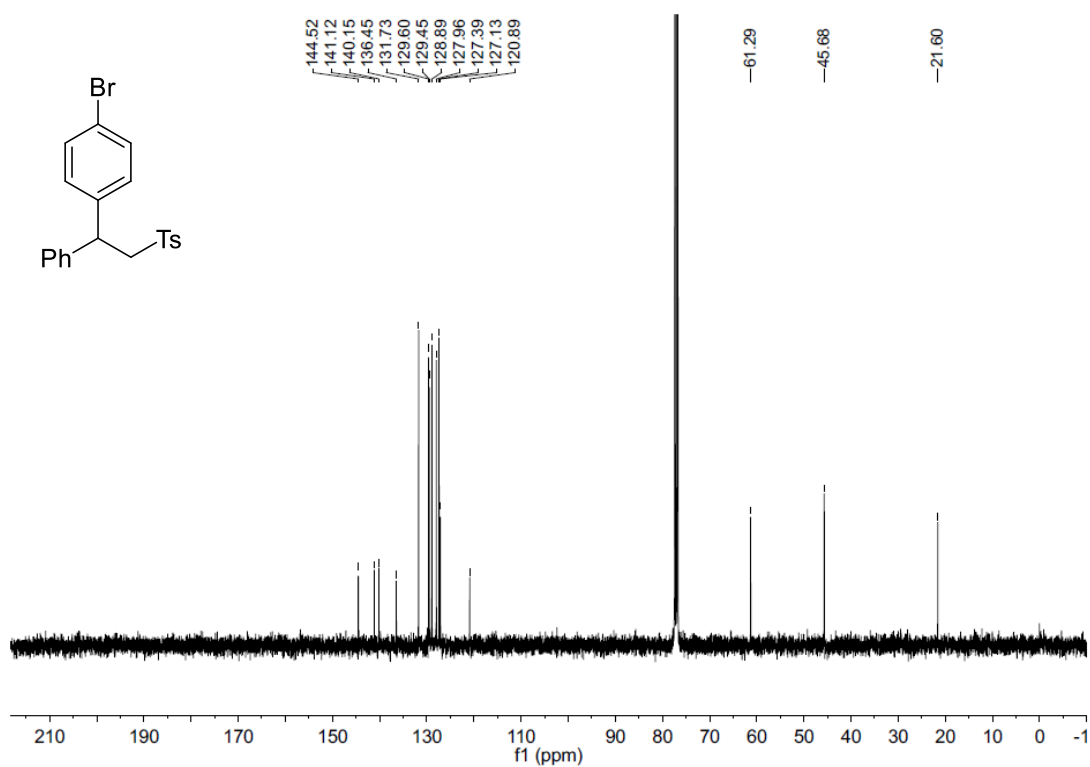

**<sup>1</sup>H NMR (CDCl<sub>3</sub>, 400 MHz) of 1-Methyl-4-((2-phenyl-2-(4-(trifluoromethyl)phenyl)ethyl)sulfonyl)benzene (4ae)**

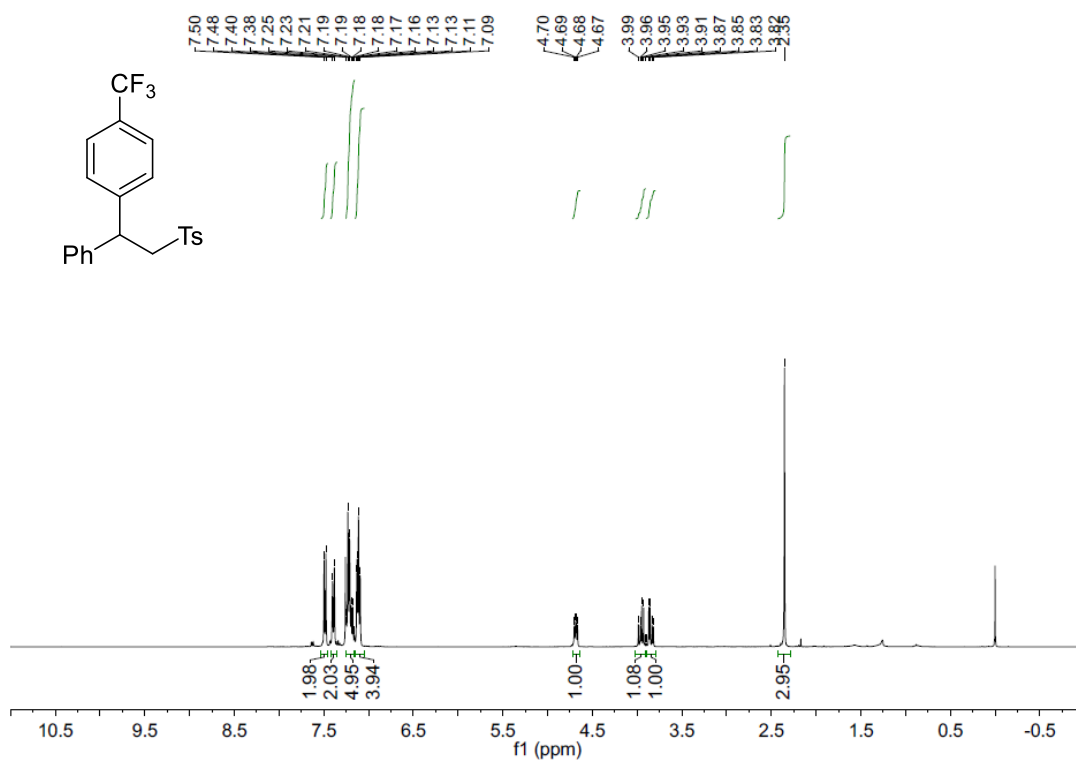

**<sup>13</sup>C NMR (CDCl<sub>3</sub>, 100 MHz) of 1-Methyl-4-((2-phenyl-2-(4-(trifluoromethyl)phenyl)ethyl)sulfonyl)benzene (4ae)**

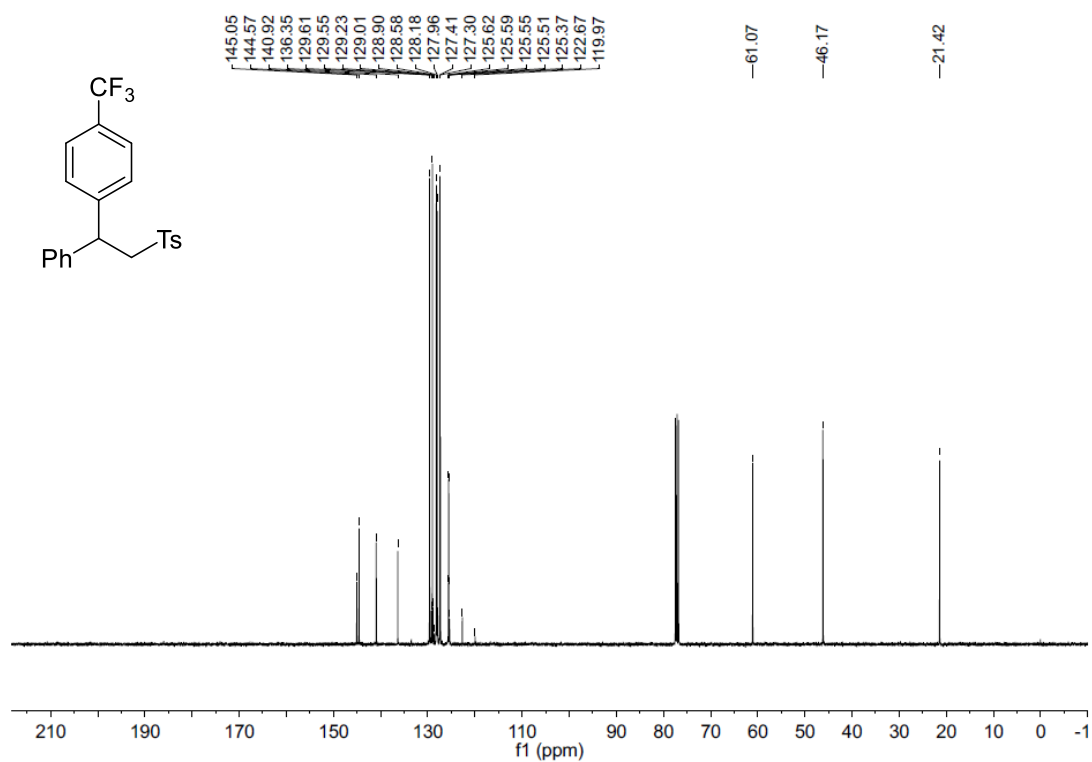



**$^1\text{H}$  NMR ( $\text{CDCl}_3$ , 400 MHz) of 1-Fluoro-2-(1-phenyl-2-tosylethyl)benzene (4af)**

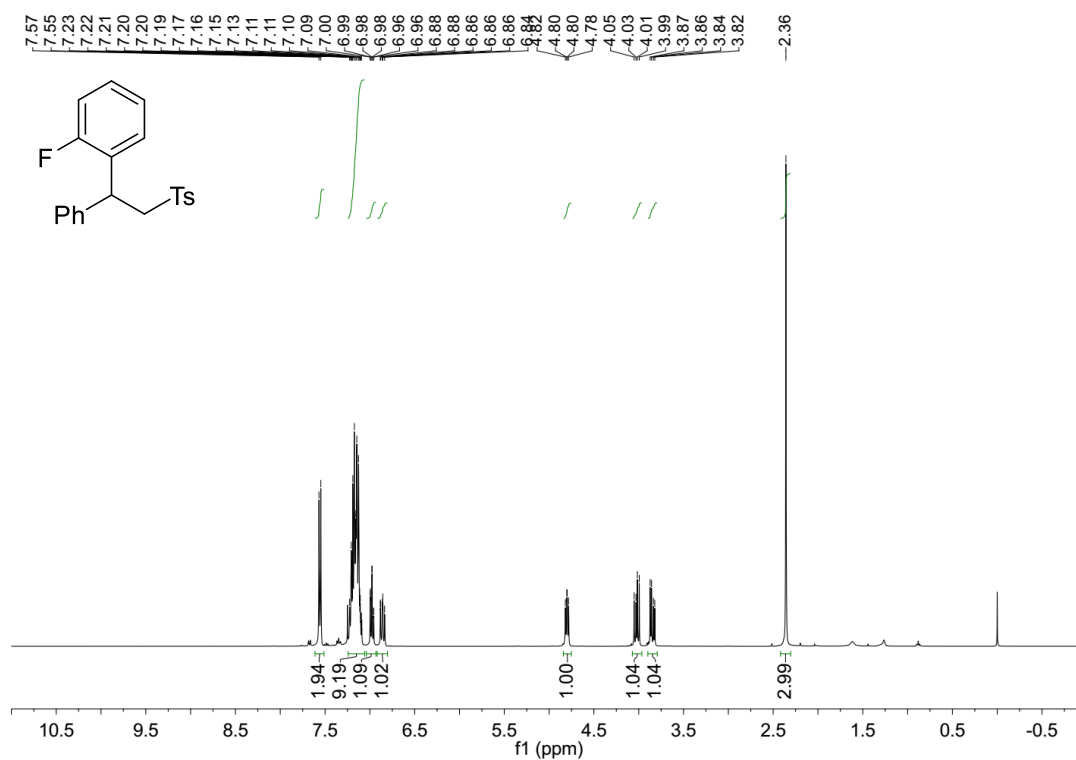

**$^{13}\text{C}$  NMR ( $\text{CDCl}_3$ , 100 MHz) of 1-Fluoro-2-(1-phenyl-2-tosylethyl)benzene (4af)**

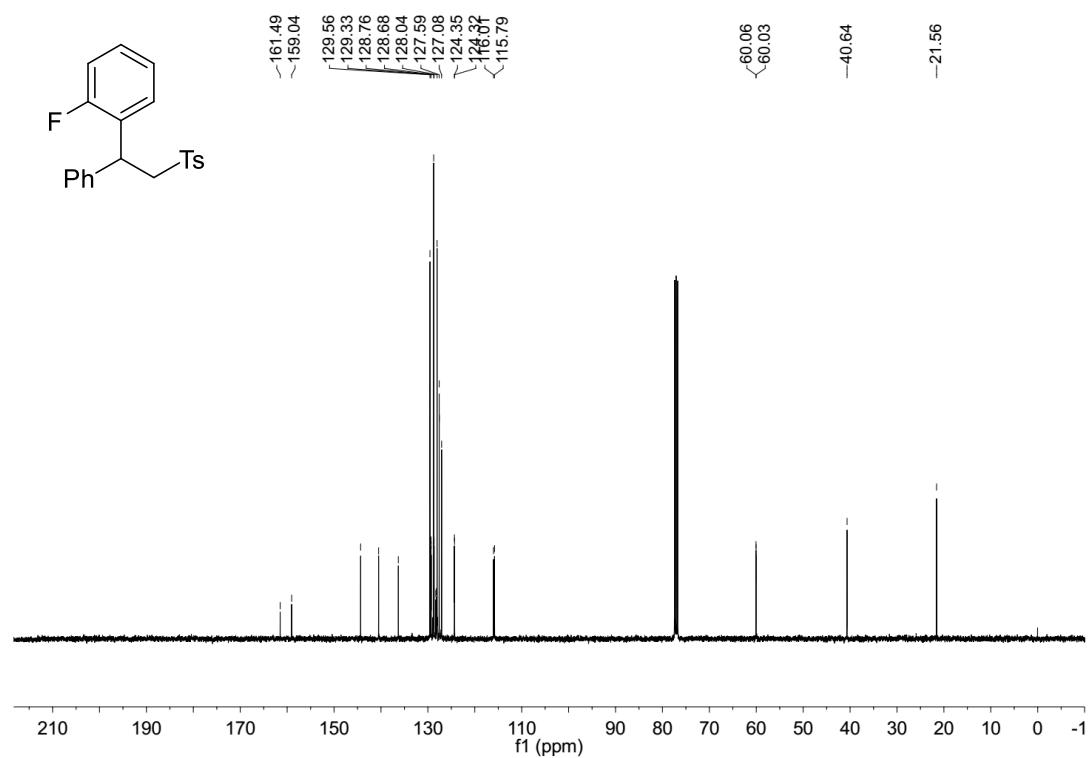

**$^1\text{H}$  NMR ( $\text{CDCl}_3$ , 400 MHz) of 1-Bromo-2-(1-phenyl-2-tosylethyl)benzene (4ag)**

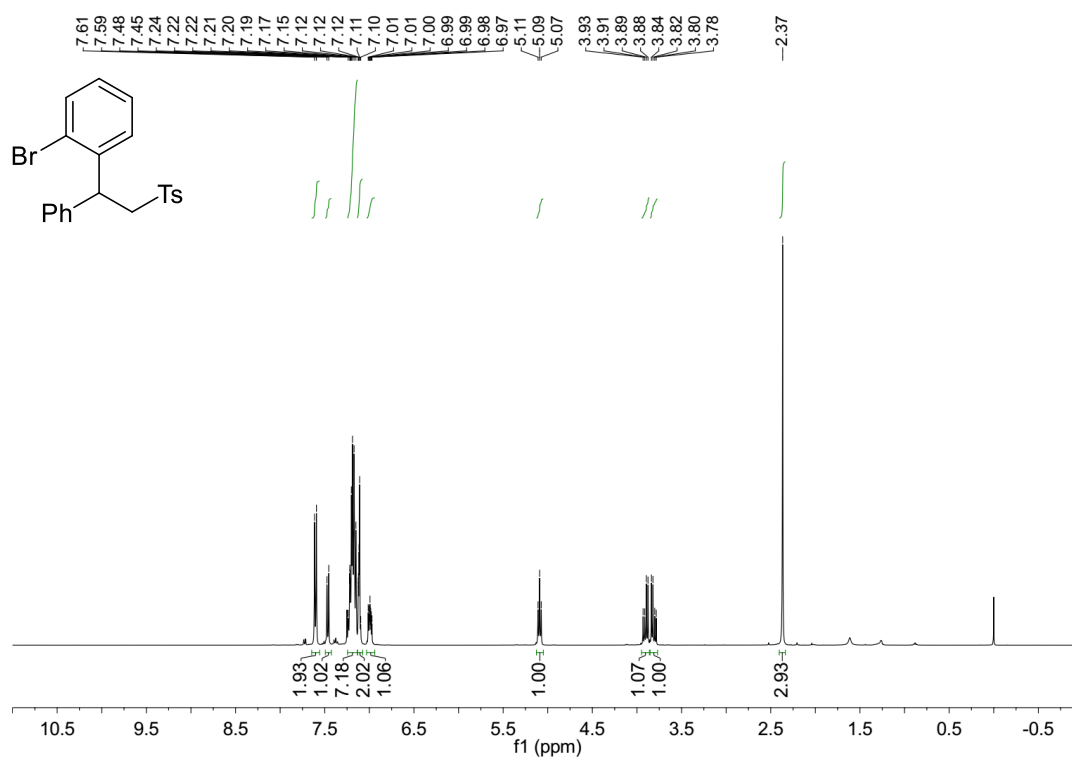

**$^{13}\text{C}$  NMR ( $\text{CDCl}_3$ , 100 MHz) of 1-Bromo-2-(1-phenyl-2-tosylethyl)benzene (4ag)**

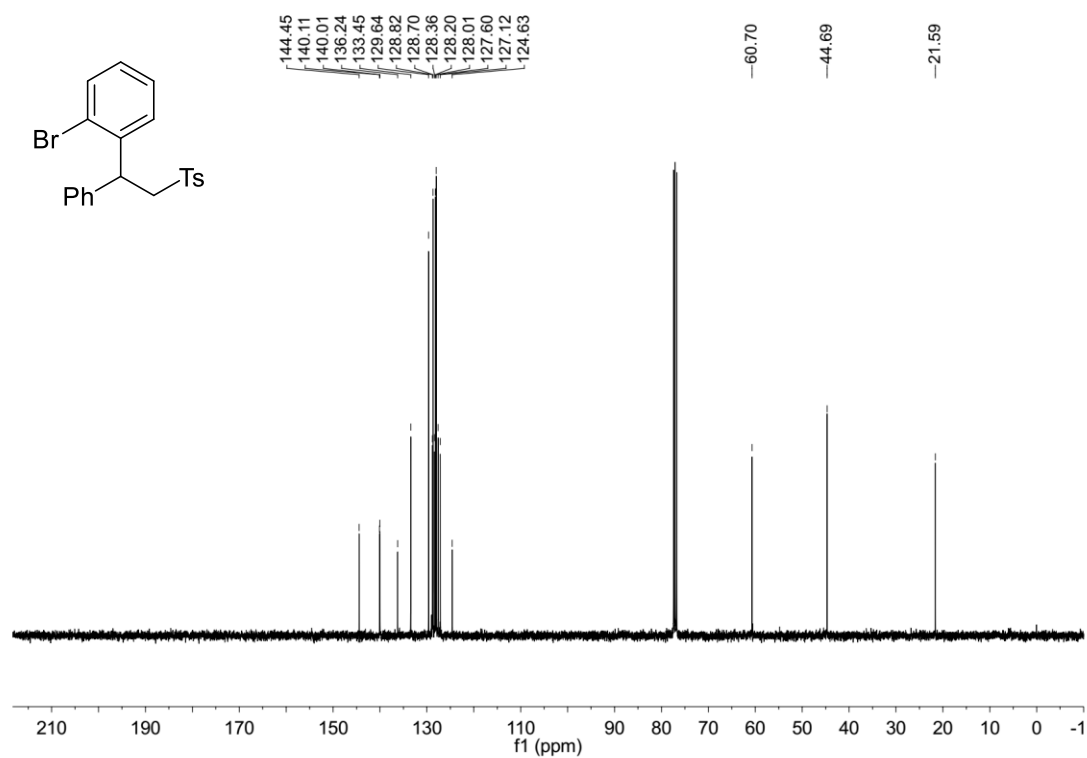

**<sup>1</sup>H NMR (CDCl<sub>3</sub>, 400 MHz) of 1-Methoxy-3-(1-phenyl-2-tosylethyl)benzene (4ah)**

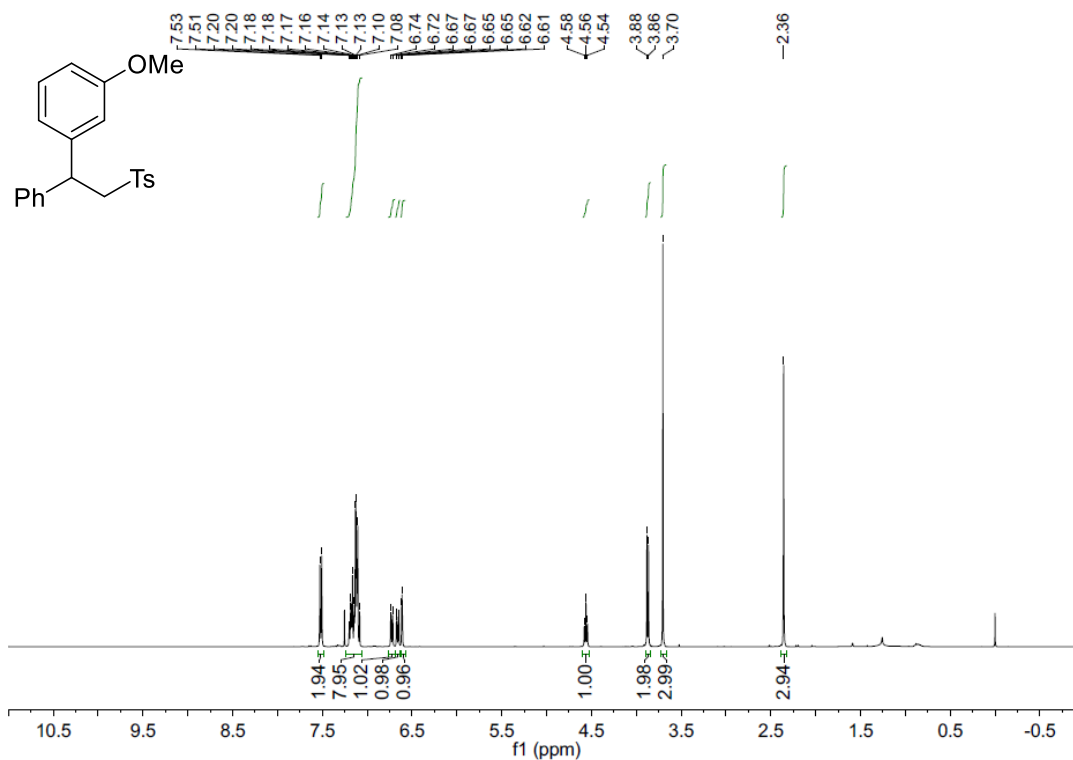

**<sup>13</sup>C NMR (CDCl<sub>3</sub>, 100 MHz) of 1-Methoxy-3-(1-phenyl-2-tosylethyl)benzene (4ah)**

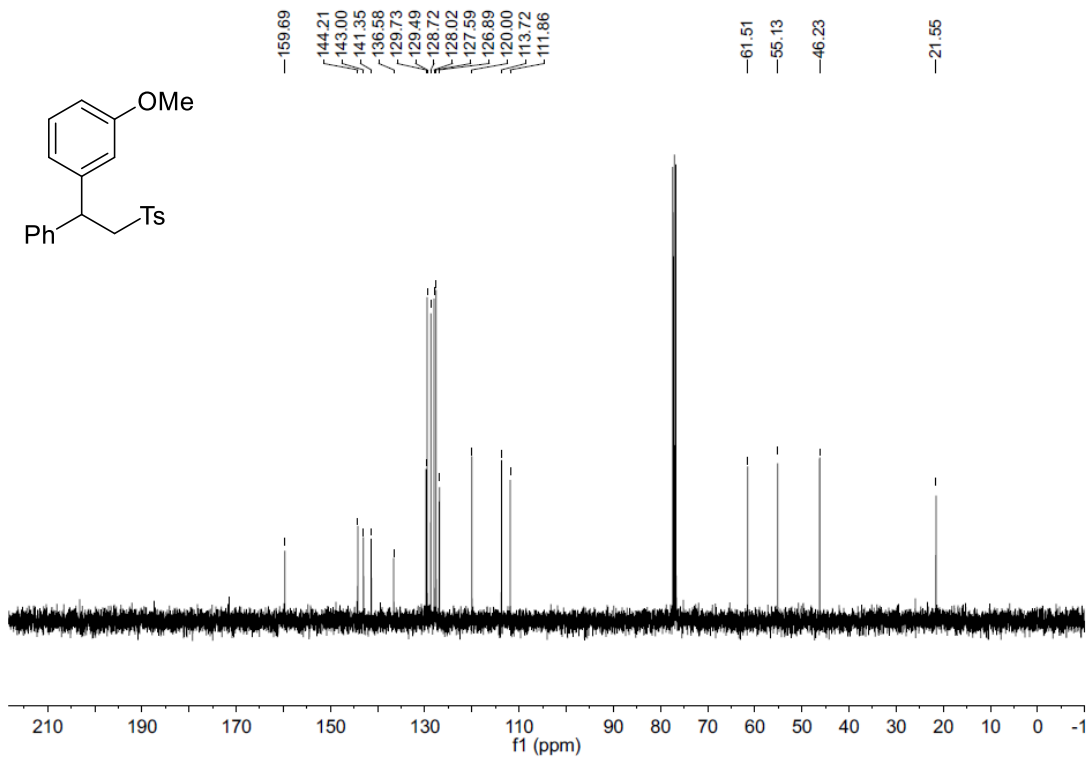

**<sup>1</sup>H NMR (CDCl<sub>3</sub>, 400 MHz) of 4-(1-Phenyl-2-tosylethyl)benzaldehyde (4ai)**

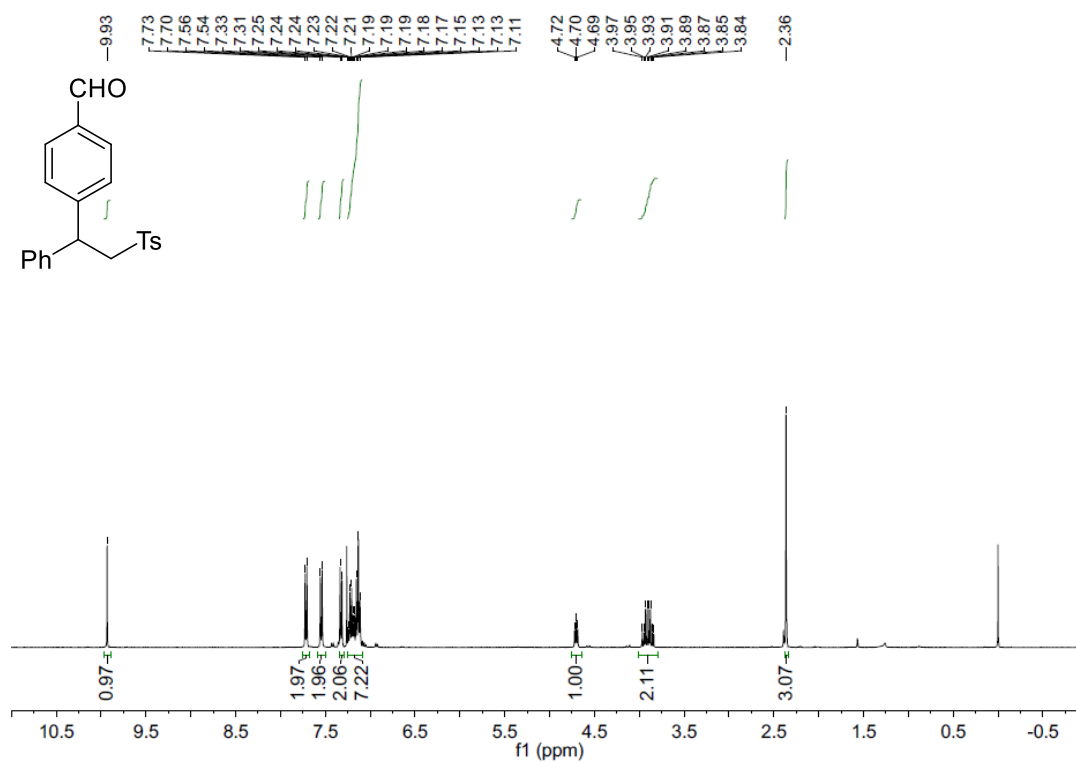

**<sup>13</sup>C NMR (CDCl<sub>3</sub>, 100 MHz) of 4-(1-Phenyl-2-tosylethyl)benzaldehyde (4ai)**

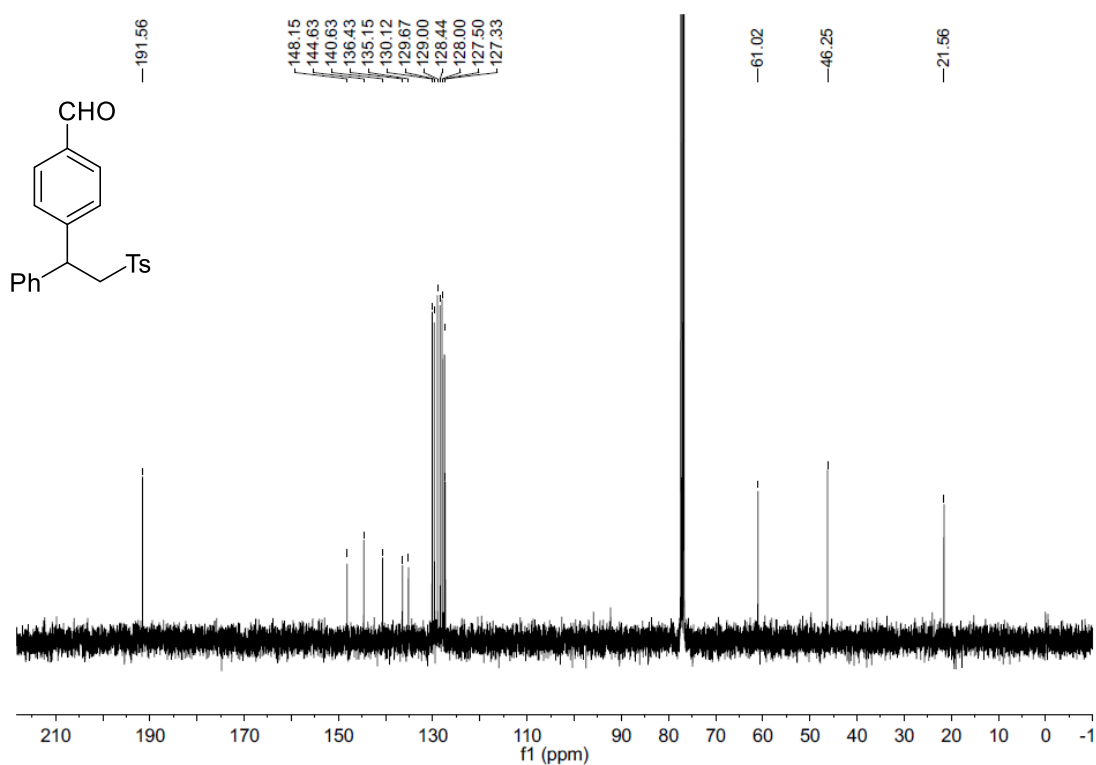

**<sup>1</sup>H NMR (CDCl<sub>3</sub>, 400 MHz) of 1-(4-(1-Phenyl-2-tosylethyl)phenyl)ethan-1-one (4aj)**

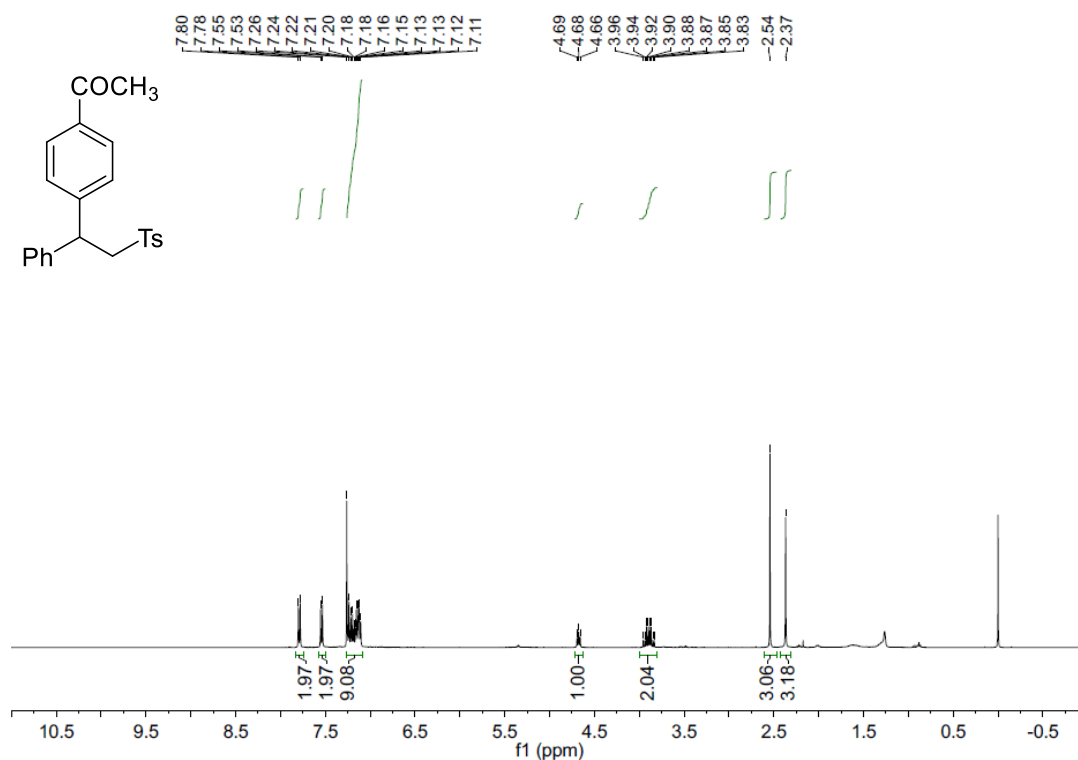

**<sup>13</sup>C NMR (CDCl<sub>3</sub>, 100 MHz) of 1-(4-(1-Phenyl-2-tosylethyl)phenyl)ethan-1-one (4aj)**

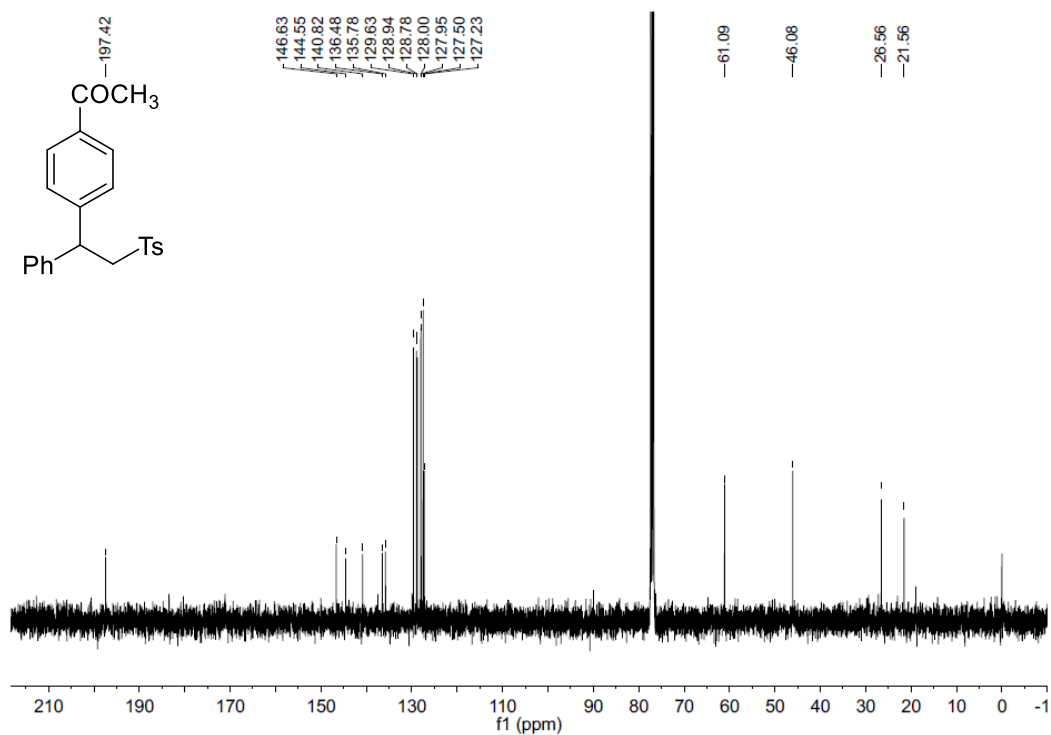

**<sup>1</sup>H NMR (CDCl<sub>3</sub>, 400 MHz) of Methyl 4-(1-phenyl-2-tosylethyl)benzoate (4ak)**

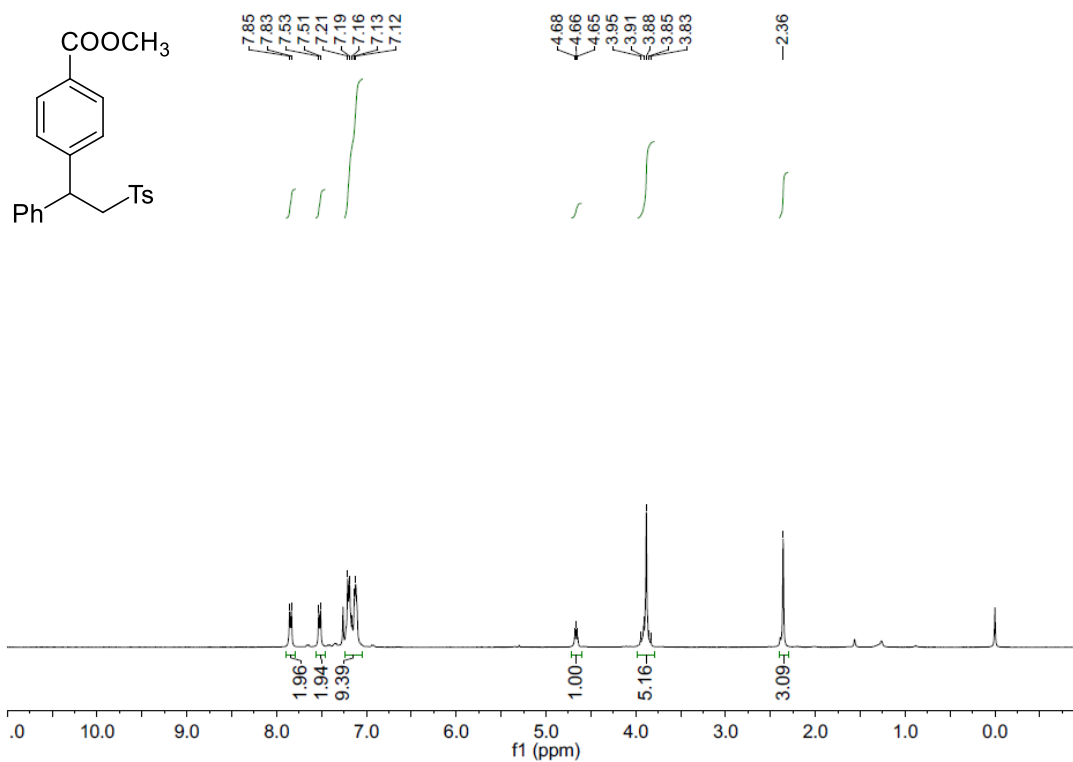

**<sup>13</sup>C NMR (CDCl<sub>3</sub>, 100 MHz) of Methyl 4-(1-phenyl-2-tosylethyl)benzoate (4ak)**

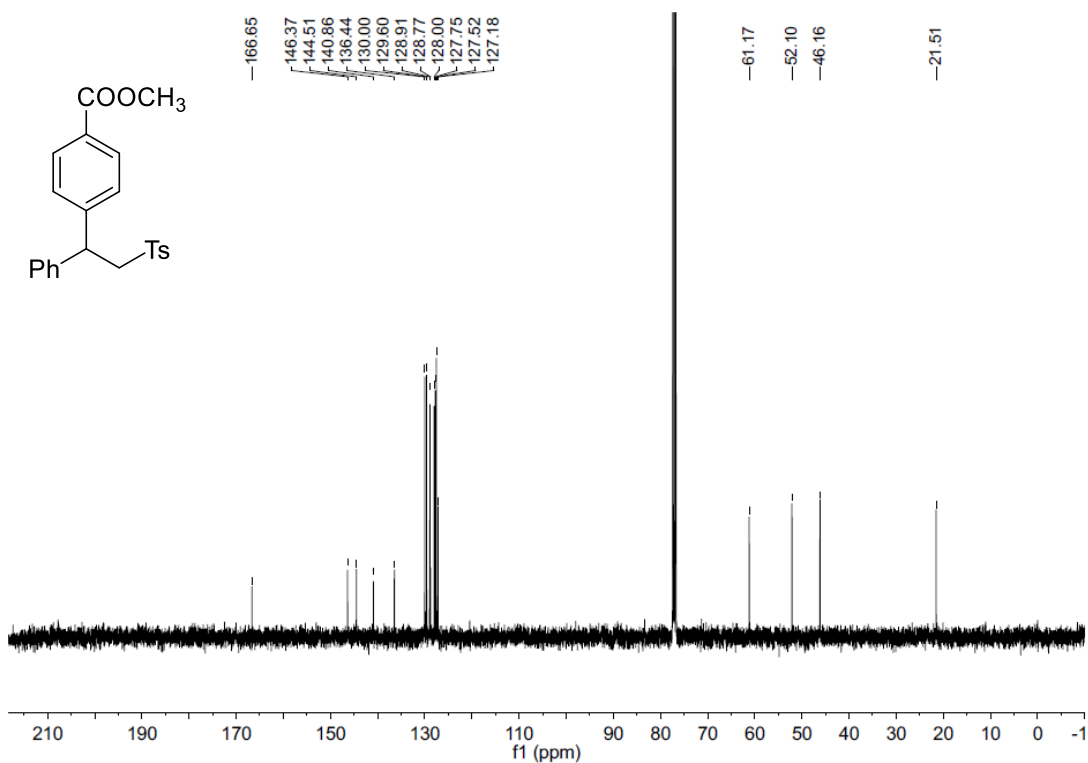

**$^1\text{H}$  NMR ( $\text{CDCl}_3$ , 400 MHz) of 2-(1-Phenyl-2-tosylethyl)thiophene (4al)**

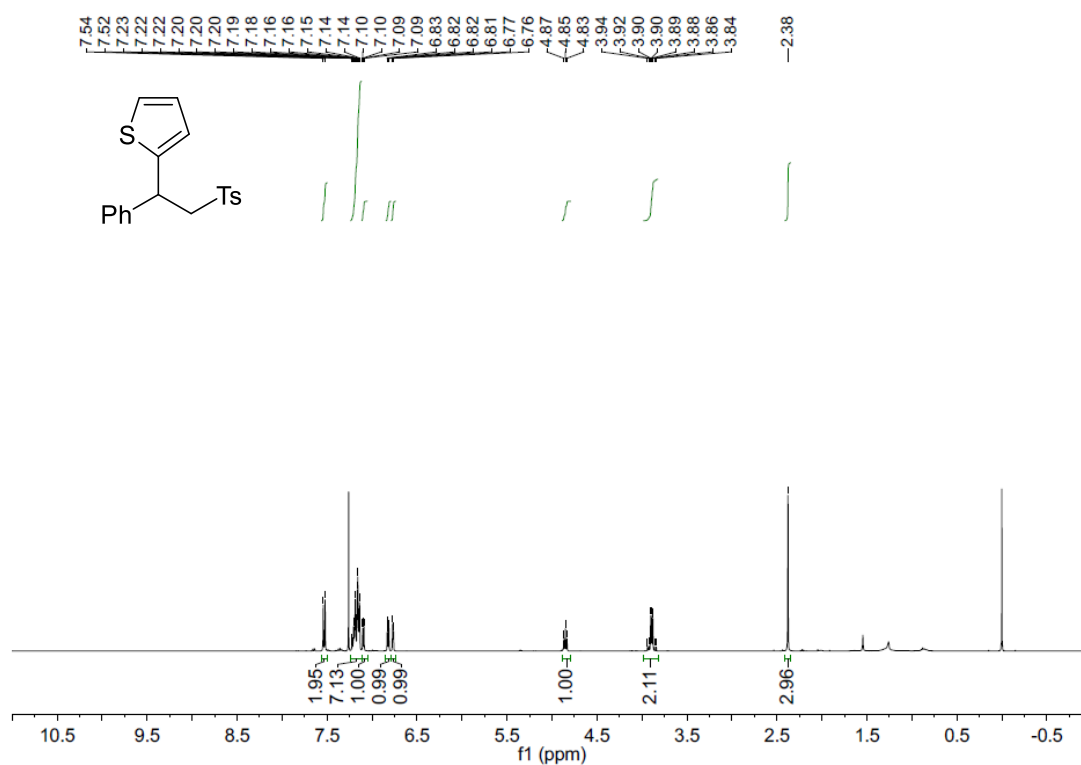

**$^{13}\text{C}$  NMR ( $\text{CDCl}_3$ , 100 MHz) of 2-(1-Phenyl-2-tosylethyl)thiophene (4al)**

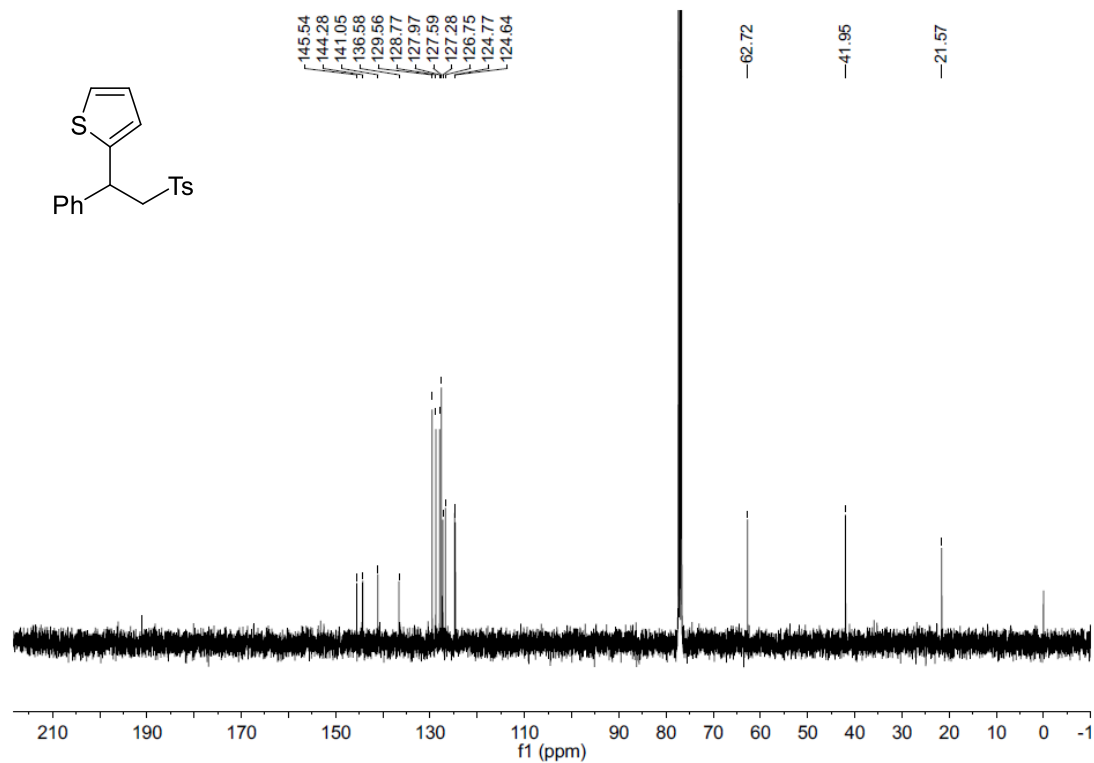

**$^1\text{H}$  NMR ( $\text{CDCl}_3$ , 400 MHz) of 3-(1-Phenyl-2-tosylethyl)thiophene (4am)**

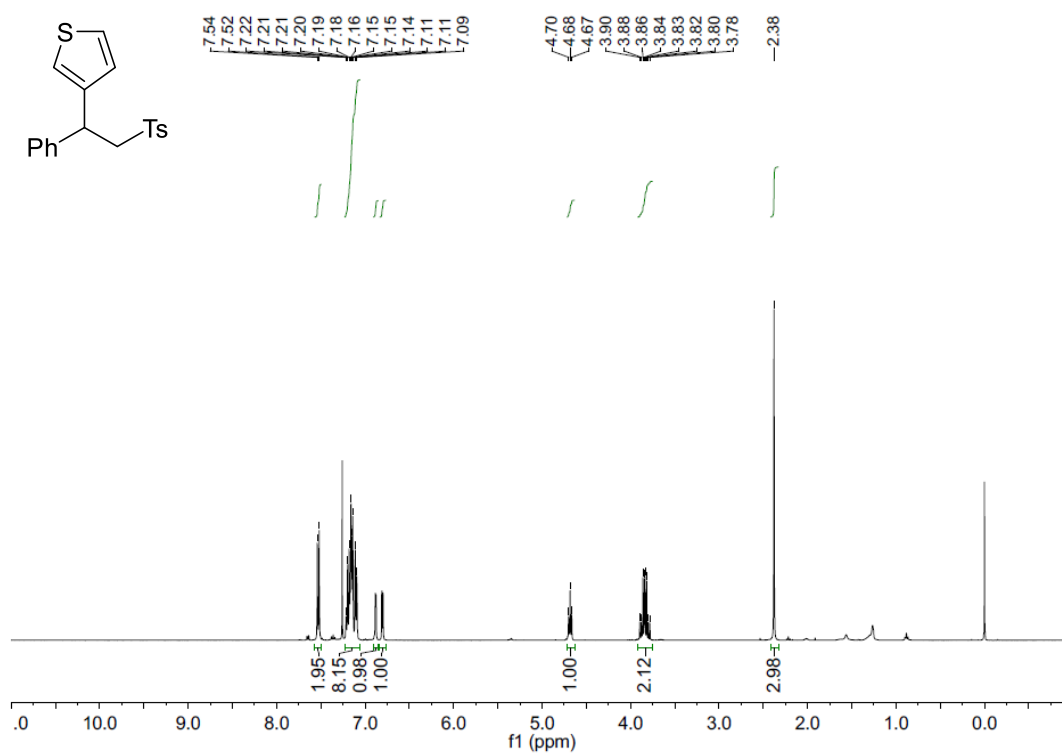

**$^{13}\text{C}$  NMR ( $\text{CDCl}_3$ , 100 MHz) of 3-(1-Phenyl-2-tosylethyl)thiophene (4am)**

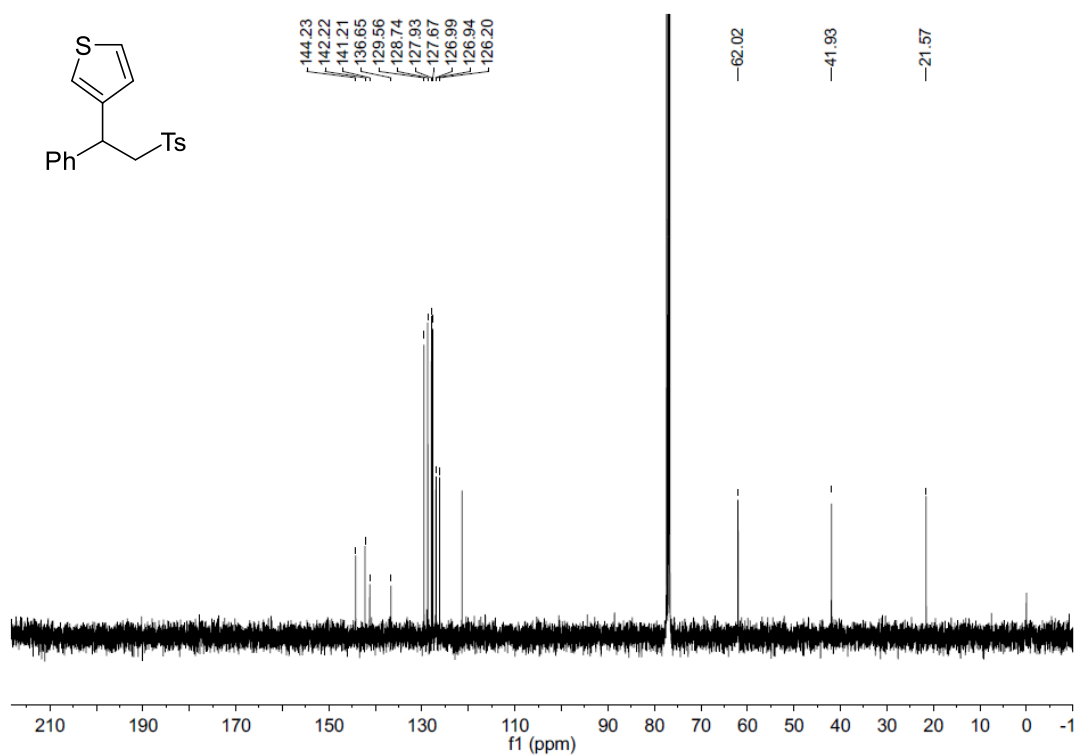



**$^1\text{H}$  NMR ( $\text{CDCl}_3$ , 400 MHz) of 1-(*tert*-Butyl)-4-(1-phenyl-2-tosylethyl)benzene (5aa)**

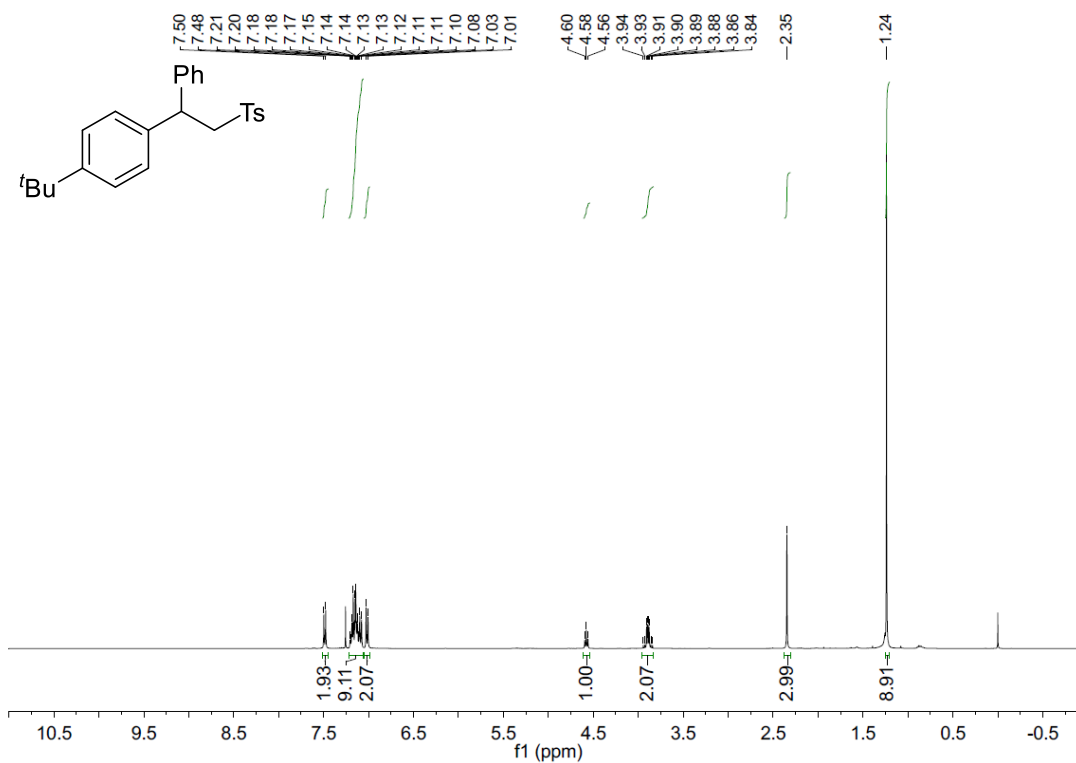

**$^{13}\text{C}$  NMR ( $\text{CDCl}_3$ , 100 MHz) of 1-(*tert*-Butyl)-4-(1-phenyl-2-tosylethyl)benzene (5aa)**

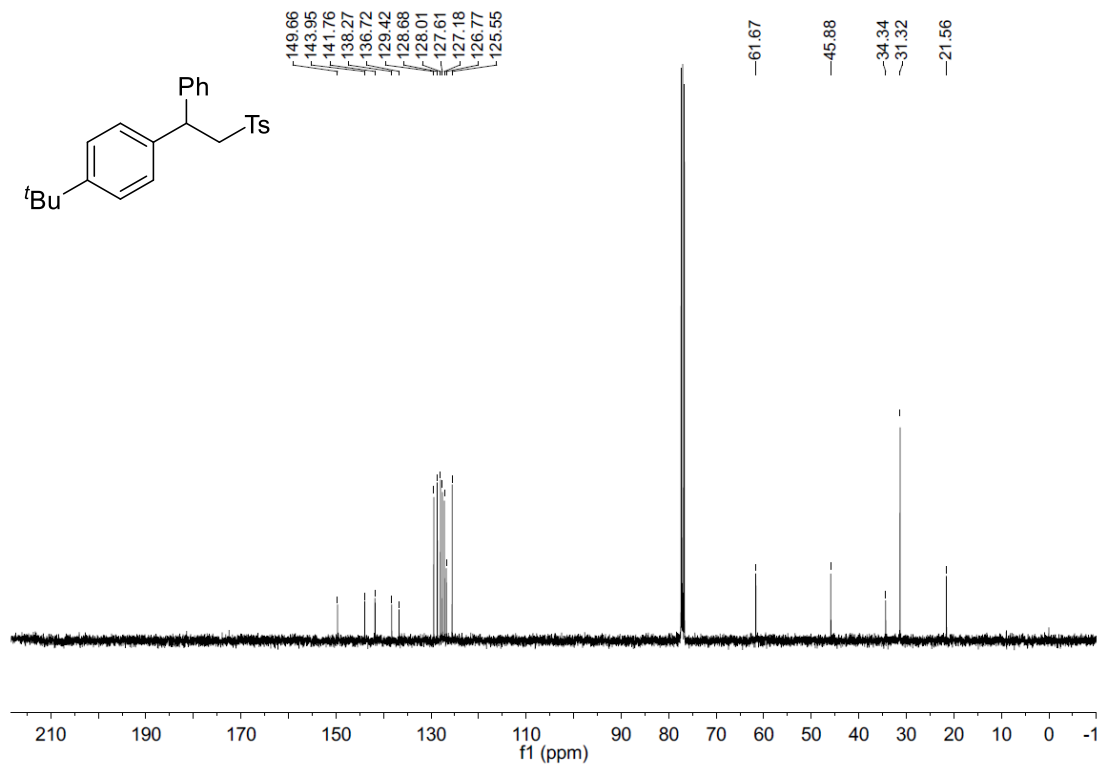

**<sup>1</sup>H NMR (CDCl<sub>3</sub>, 400 MHz) of 1-Methoxy-4-(1-phenyl-2-tosylethyl)benzene (5ab)**

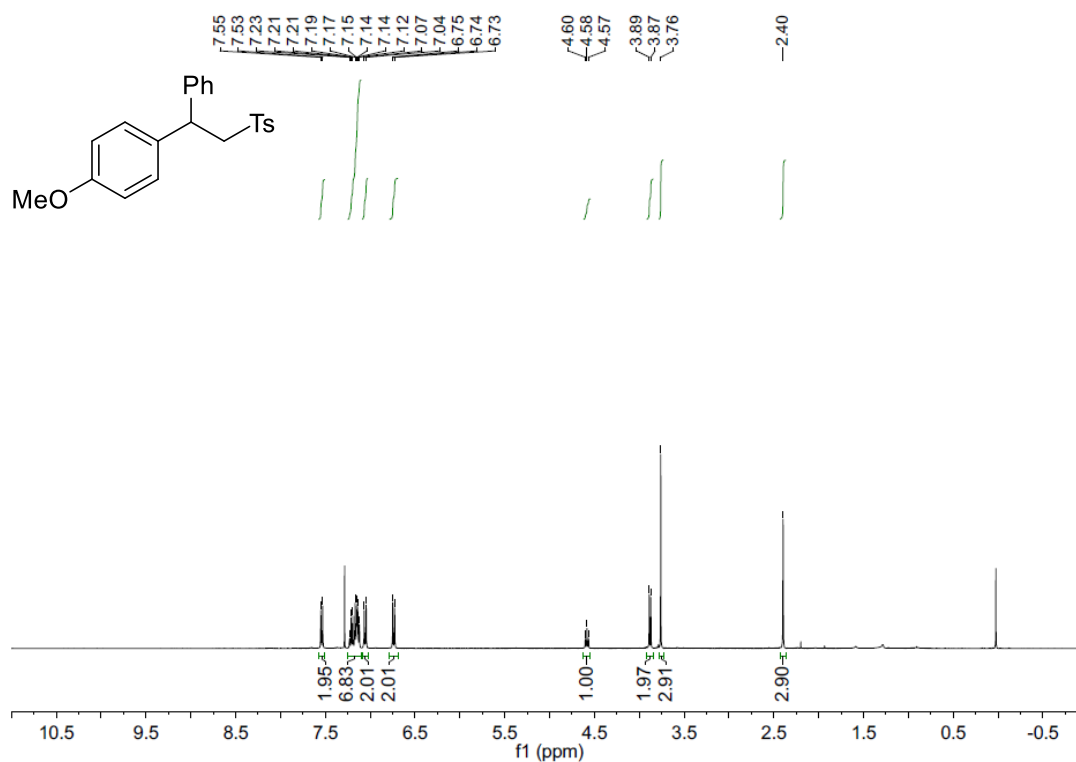

**<sup>13</sup>C NMR (CDCl<sub>3</sub>, 100 MHz) of 1-Methoxy-4-(1-phenyl-2-tosylethyl)benzene (5ab)**

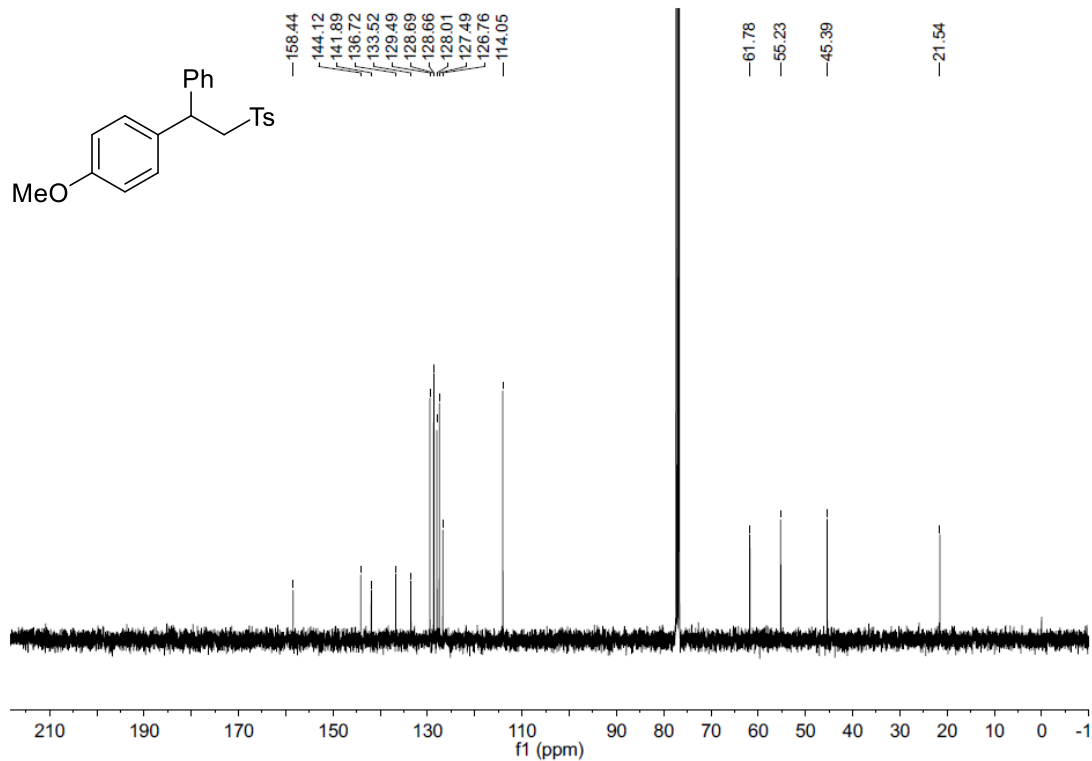

**<sup>1</sup>H NMR (CDCl<sub>3</sub>, 400 MHz) of 4-(1-Phenyl-2-tosylethyl)-1,1'-biphenyl (5ac)**

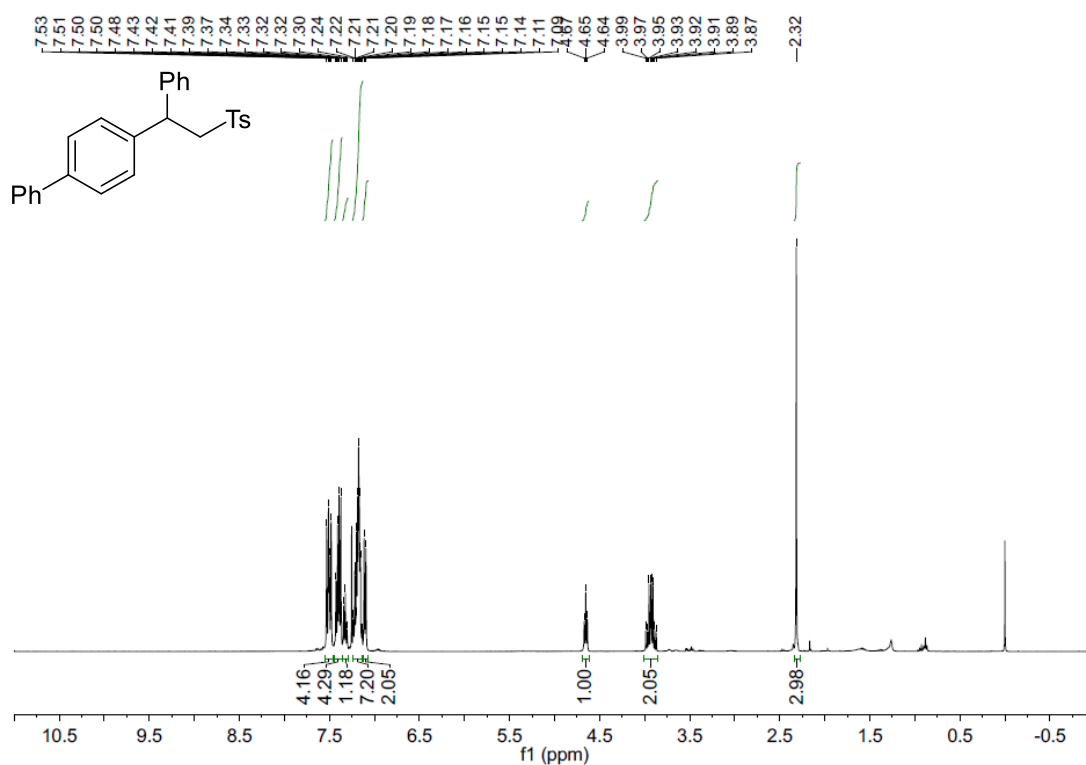

**<sup>13</sup>C NMR (CDCl<sub>3</sub>, 100 MHz) of 4-(1-Phenyl-2-tosylethyl)-1,1'-biphenyl (5ac)**

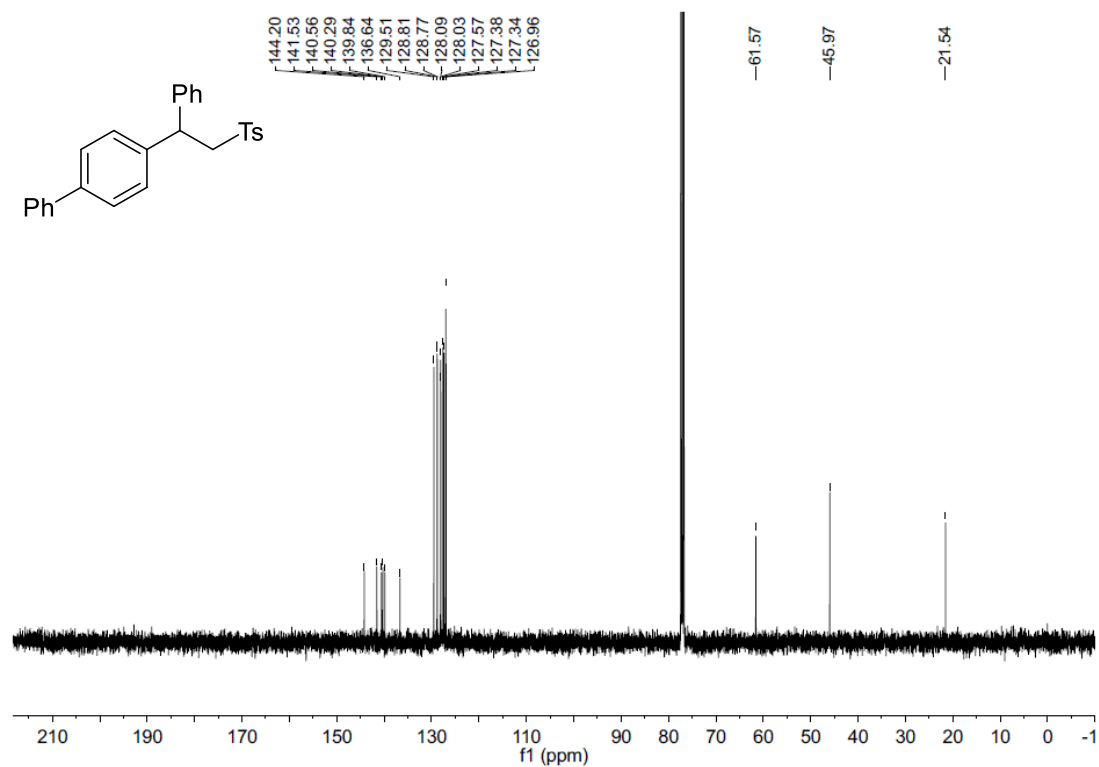

**$^1\text{H}$  NMR ( $\text{CDCl}_3$ , 400 MHz) of 1-Fluoro-4-(1-phenyl-2-tosylethyl)benzene (4ab)  
(from 1-fluoro-4-vinylbenzene)**

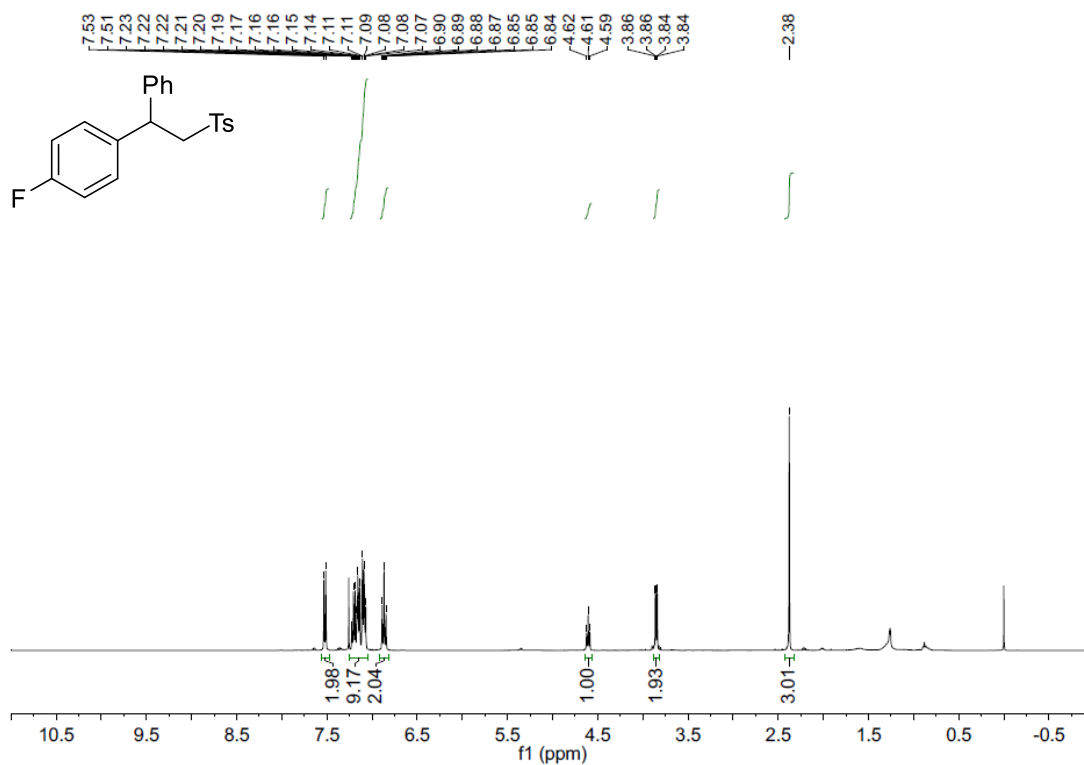

**$^{13}\text{C}$  NMR ( $\text{CDCl}_3$ , 100 MHz) of 1-Fluoro-4-(1-phenyl-2-tosylethyl)benzene (4ab)  
(from 1-fluoro-4-vinylbenzene)**

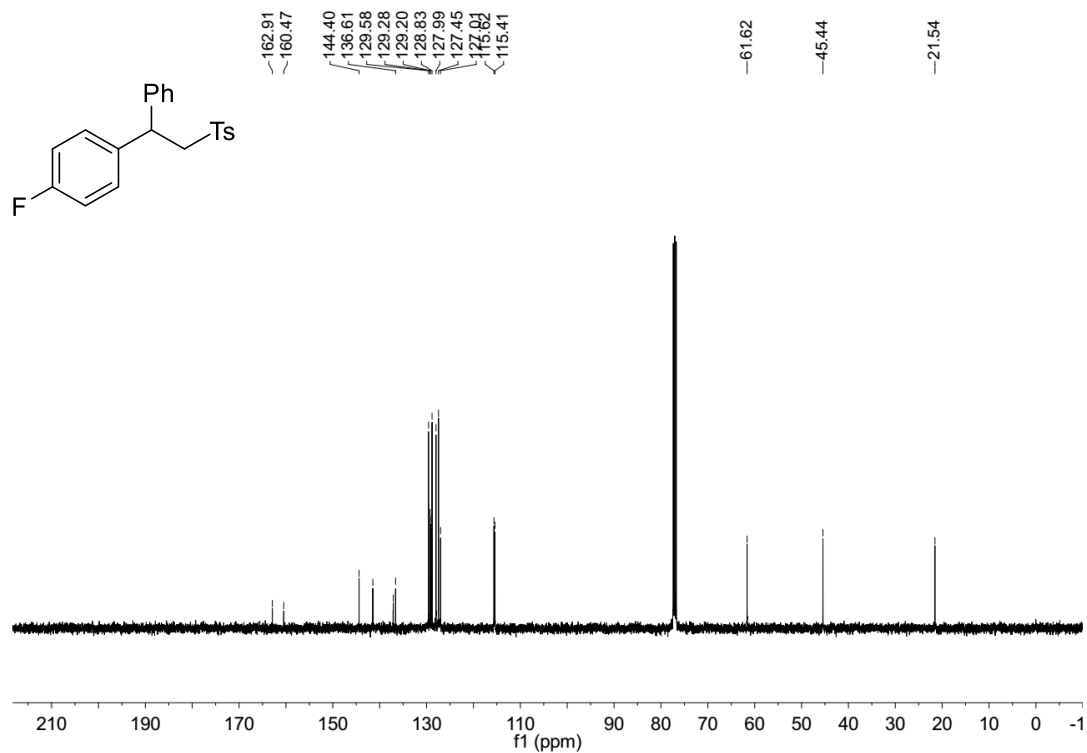

**$^1\text{H}$  NMR ( $\text{CDCl}_3$ , 400 MHz) of 1-Methyl-4-((2-phenyl-2-(4-(trifluoromethyl)phenyl)ethyl)sulfonyl)benzene (4ae) (from 1-(trifluoromethyl)-4-vinylbenzene)**

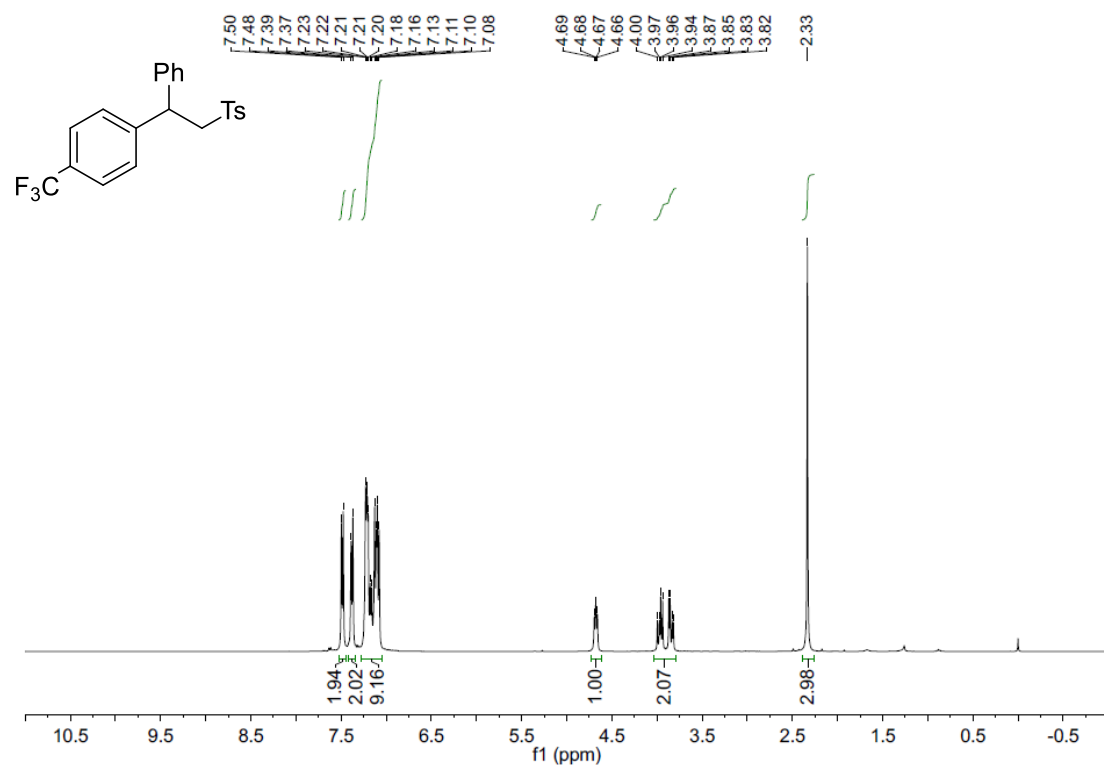

**$^{13}\text{C}$  NMR ( $\text{CDCl}_3$ , 100 MHz) of 1-Methyl-4-((2-phenyl-2-(4-(trifluoromethyl)phenyl)ethyl)sulfonyl)benzene (4ae) (from 1-(trifluoromethyl)-4-vinylbenzene)**

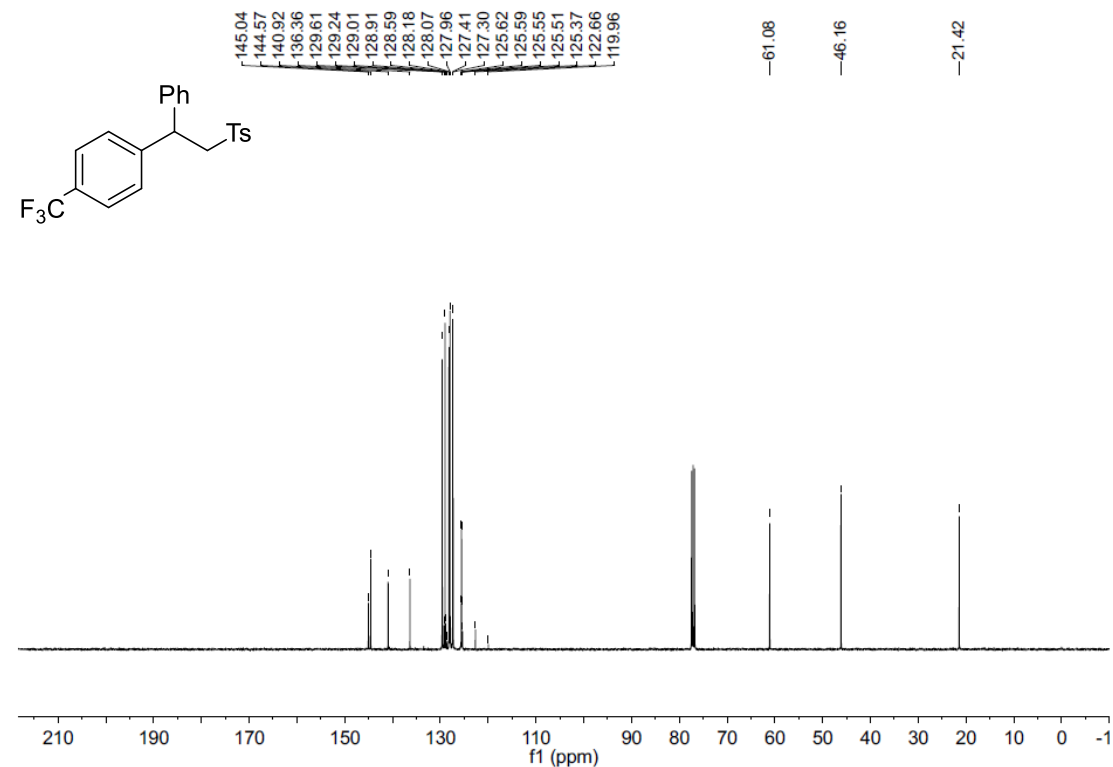

**$^1\text{H}$  NMR ( $\text{CDCl}_3$ , 400 MHz) of 1-Methyl-4-((2-(4-nitrophenyl)-2-phenylethyl) sulfonyl)benzene (5ad)**

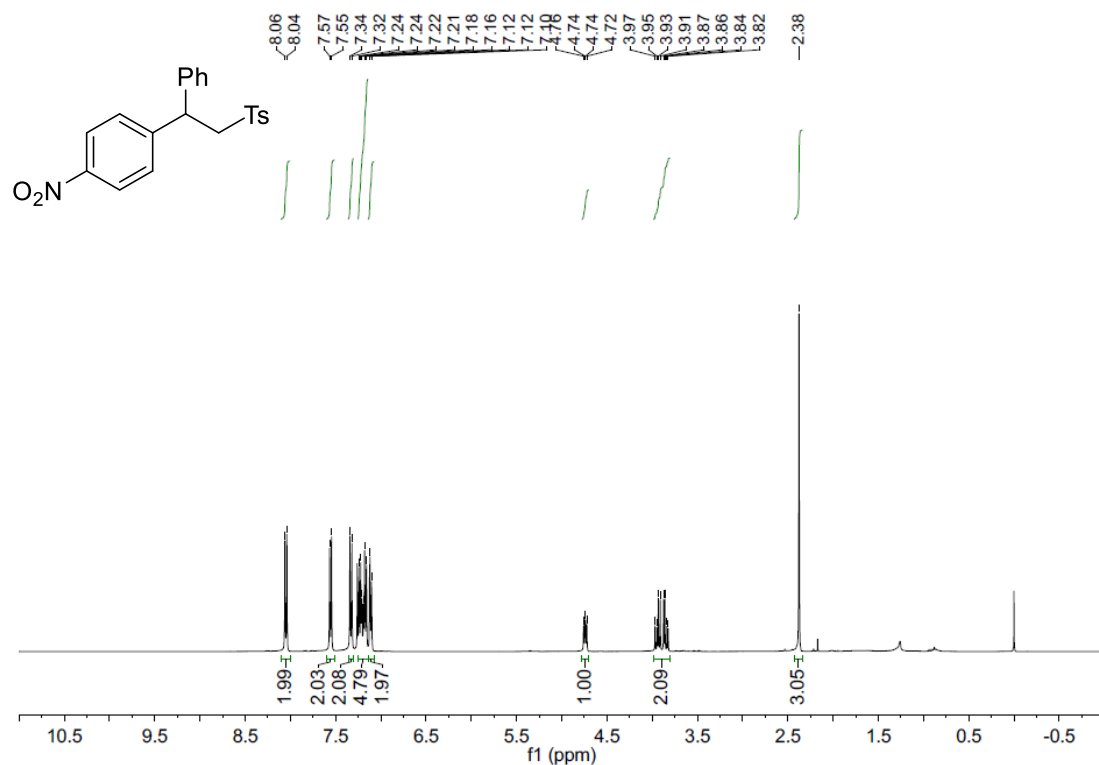

**$^{13}\text{C}$  NMR ( $\text{CDCl}_3$ , 100 MHz) of 1-Methyl-4-((2-(4-nitrophenyl)-2-phenylethyl) sulfonyl)benzene (5ad)**

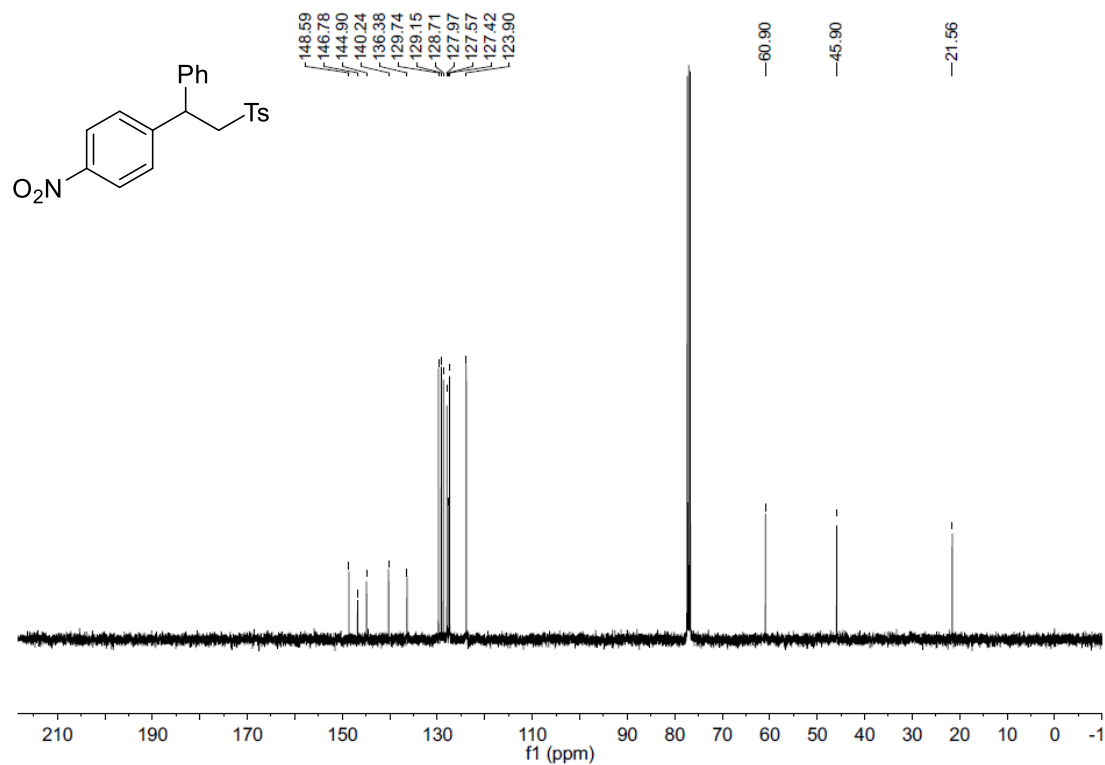

**$^1\text{H}$  NMR ( $\text{CDCl}_3$ , 400 MHz) of 1-Methyl-2-(1-phenyl-2-tosylethyl)benzene (5ae)**

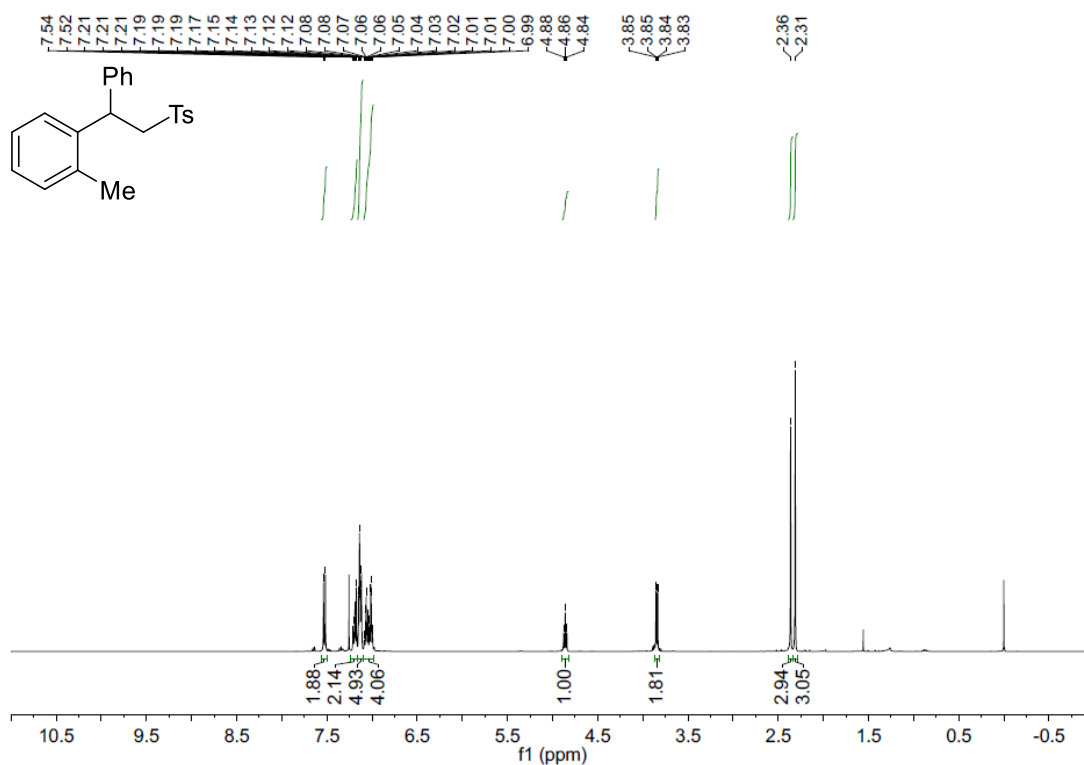

**$^{13}\text{C}$  NMR ( $\text{CDCl}_3$ , 100 MHz) of 1-Methyl-2-(1-phenyl-2-tosylethyl)benzene (5ae)**

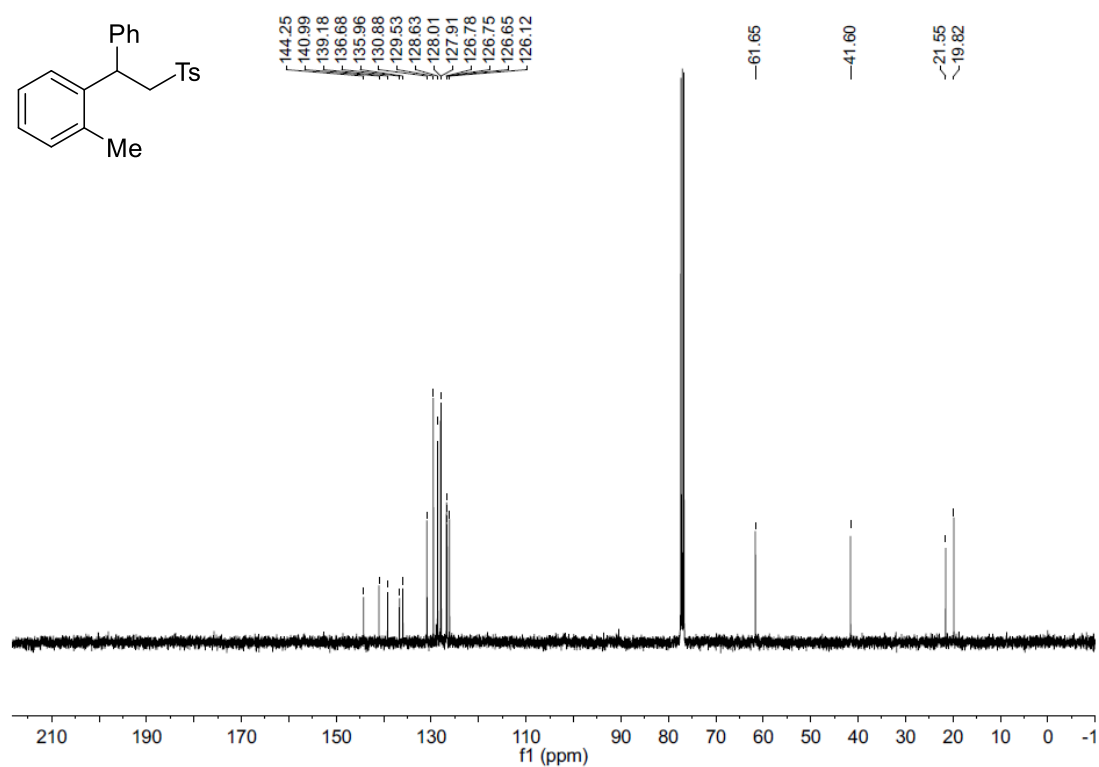

**$^1\text{H}$  NMR ( $\text{CDCl}_3$ , 400 MHz) of 1-Bromo-3-(1-phenyl-2-tosylethyl)benzene (5af)**

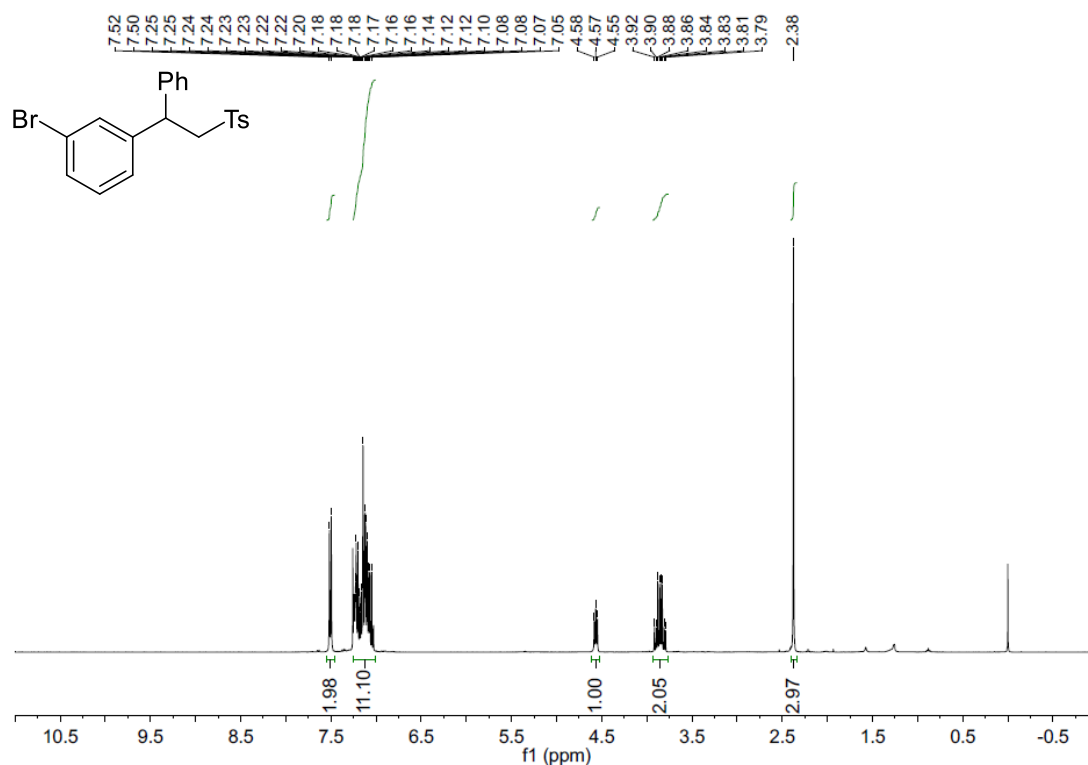

**$^{13}\text{C}$  NMR ( $\text{CDCl}_3$ , 100 MHz) of 1-Bromo-3-(1-phenyl-2-tosylethyl)benzene (5af)**

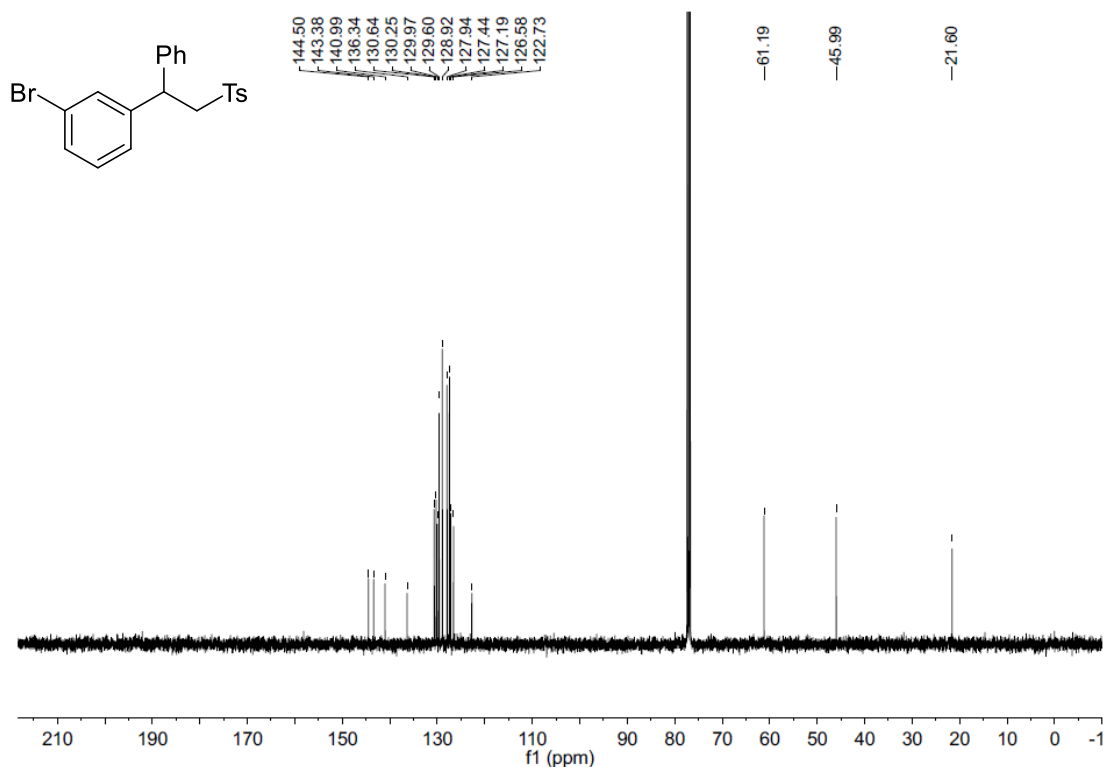



**$^1\text{H}$  NMR ( $\text{CDCl}_3$ , 400 MHz) of 1-(Chloromethyl)-4-(1-phenyl-2-tosylethyl)benzene (5ag)**

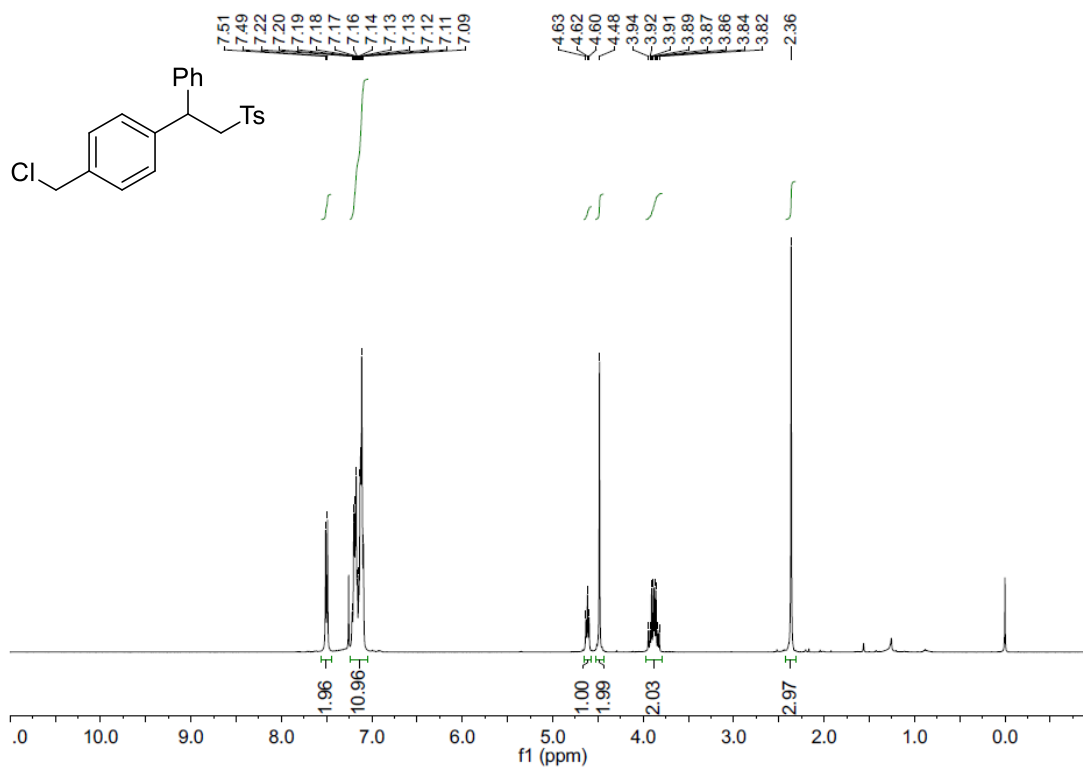

**$^{13}\text{C}$  NMR ( $\text{CDCl}_3$ , 100 MHz) of 1-(Chloromethyl)-4-(1-phenyl-2-tosylethyl)benzene (5ag)**

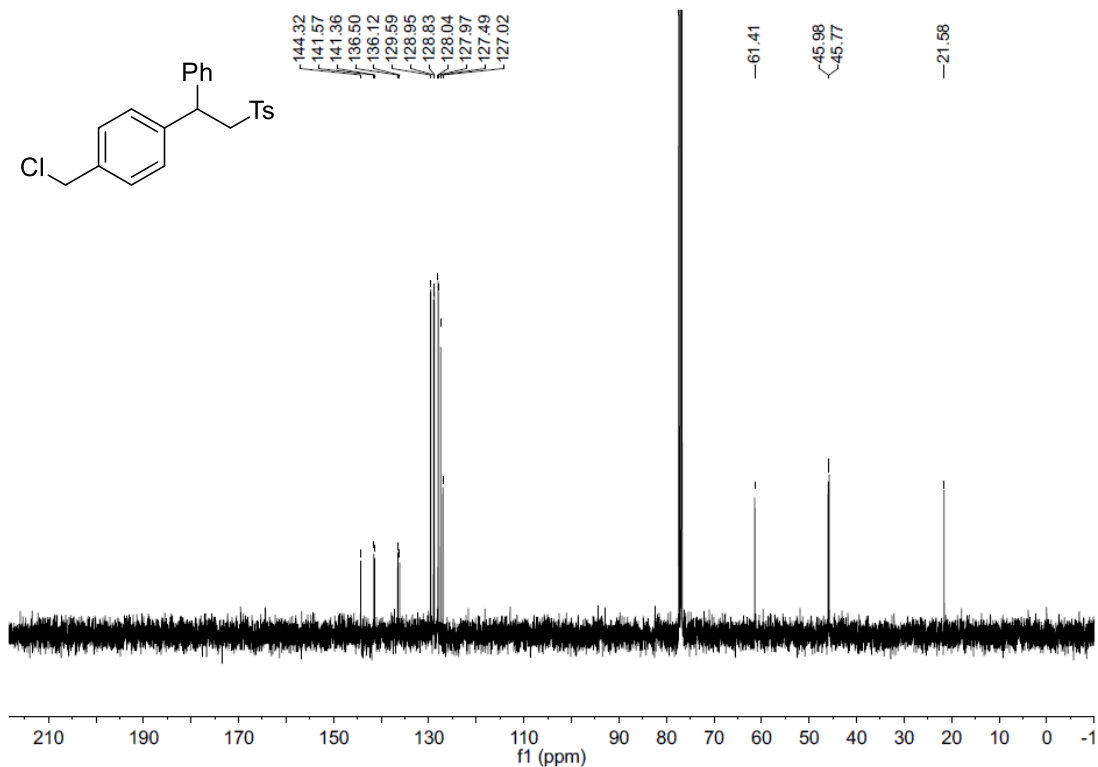

**<sup>1</sup>H NMR (CDCl<sub>3</sub>, 400 MHz) of 2-(1-Phenyl-2-tosylethyl)pyridine (5ah)**

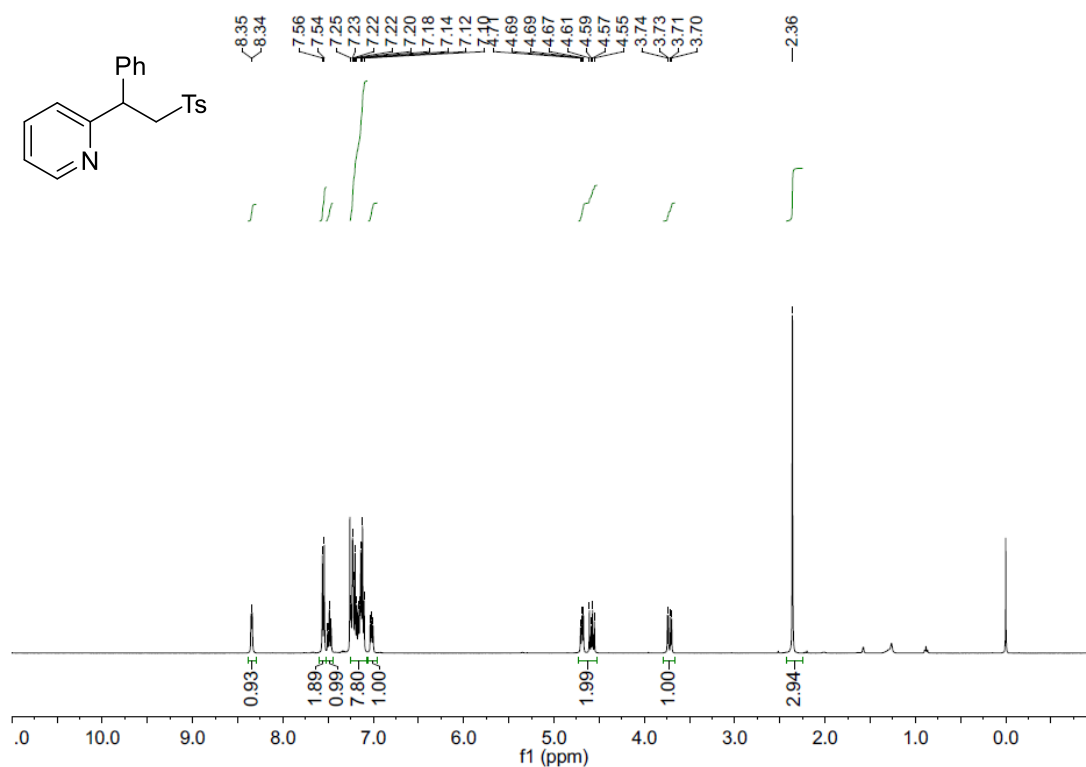

**<sup>13</sup>C NMR (CDCl<sub>3</sub>, 100 MHz) of 2-(1-Phenyl-2-tosylethyl)pyridine (5ah)**

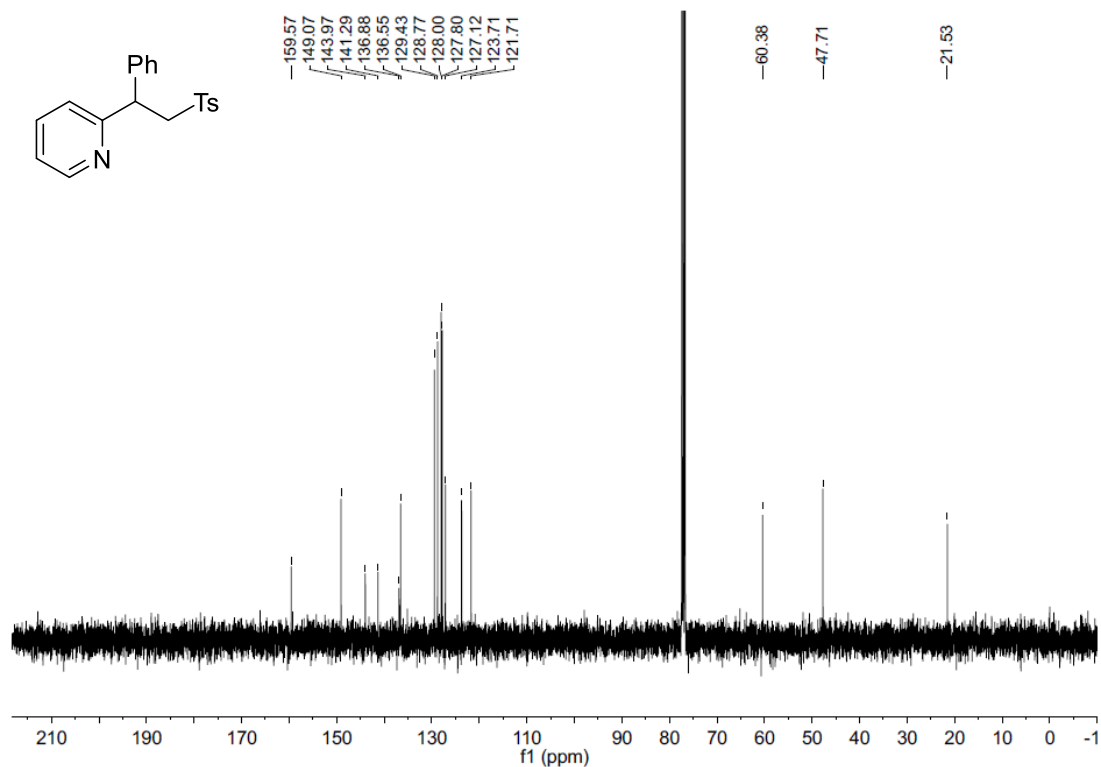

**<sup>1</sup>H NMR (CDCl<sub>3</sub>, 400 MHz) of 3-(1-Phenyl-2-tosylethyl)pyridine (5ai)**

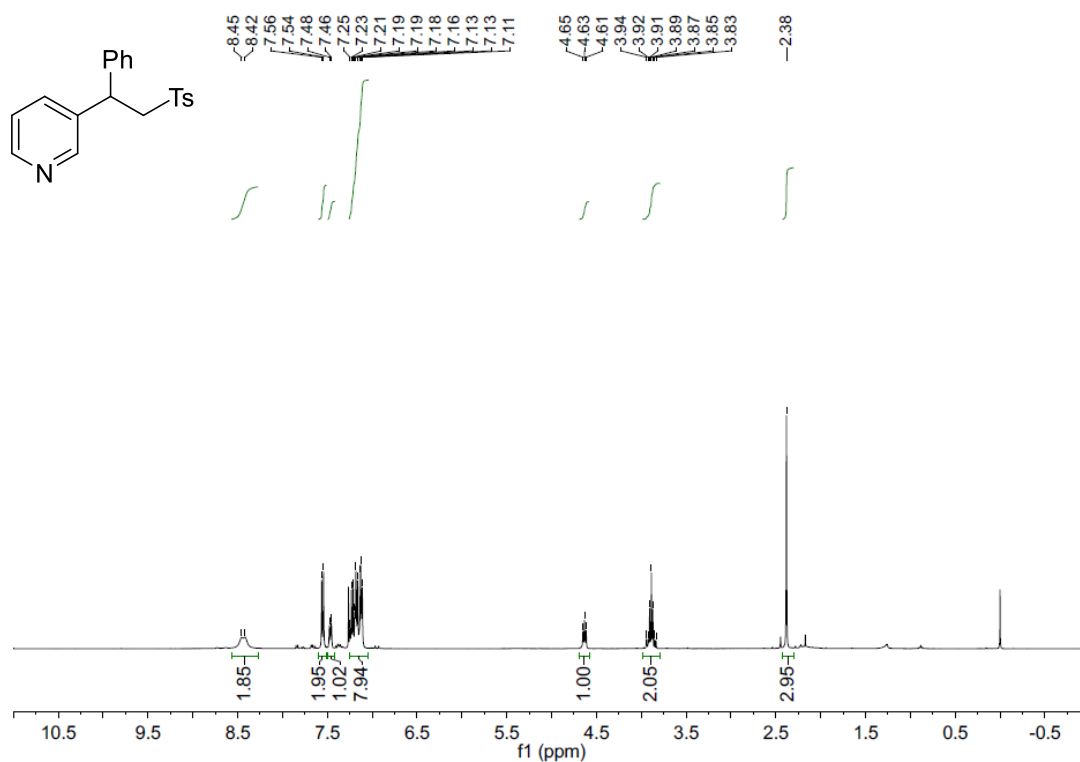

**<sup>13</sup>C NMR (CDCl<sub>3</sub>, 100 MHz) of 3-(1-Phenyl-2-tosylethyl)pyridine (5ai)**

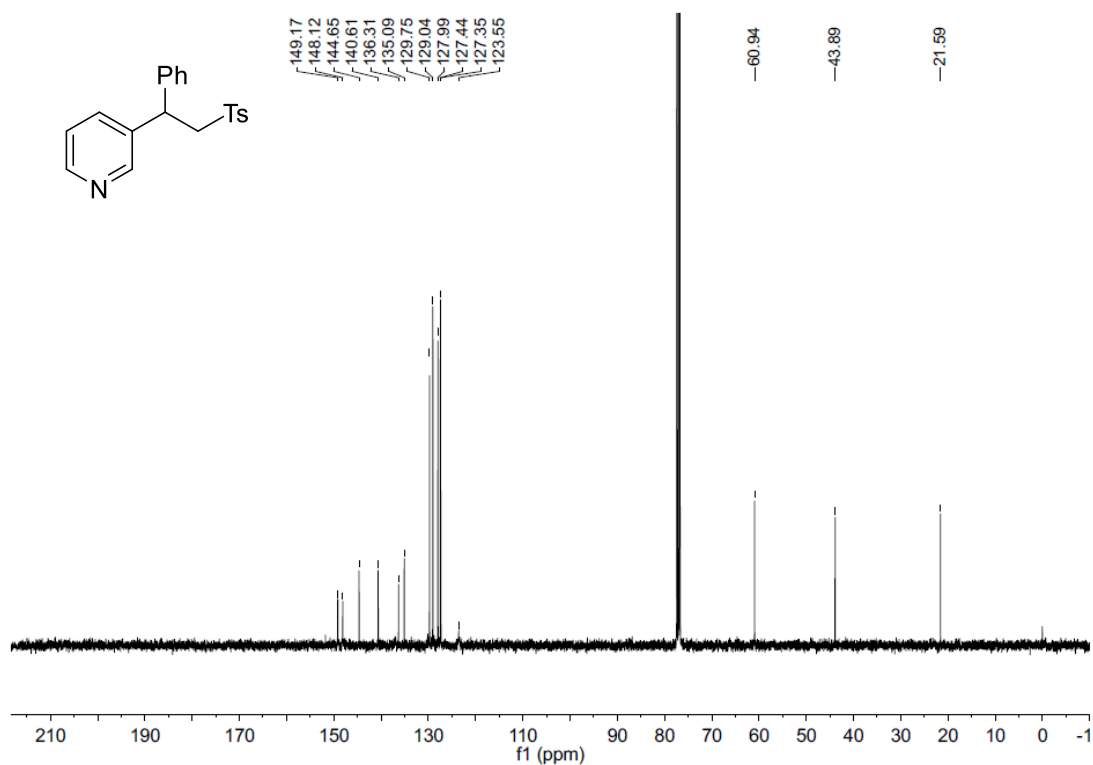

**$^1\text{H}$  NMR ( $\text{CDCl}_3$ , 400 MHz) of 2-(1-Phenyl-2-tosylethyl)thiophene (4al) (from 2-vinylthiophene)**

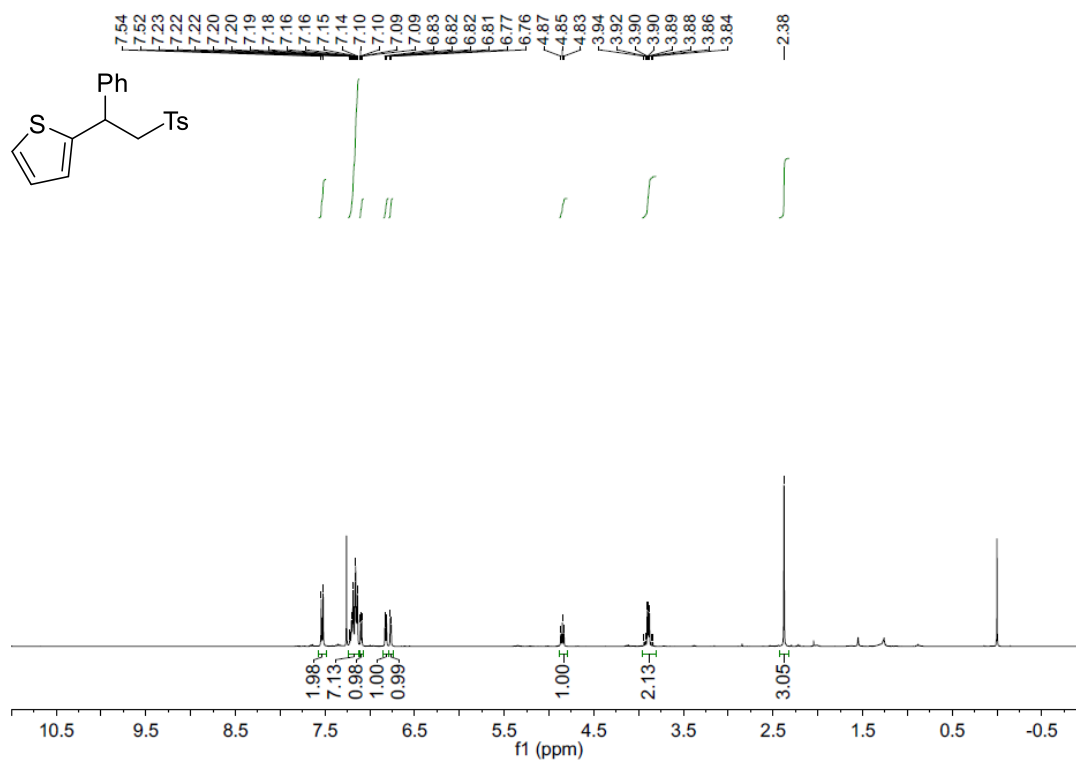

**$^{13}\text{C}$  NMR ( $\text{CDCl}_3$ , 100 MHz) of 2-(1-Phenyl-2-tosylethyl)thiophene (4al) (from 2-vinylthiophene)**

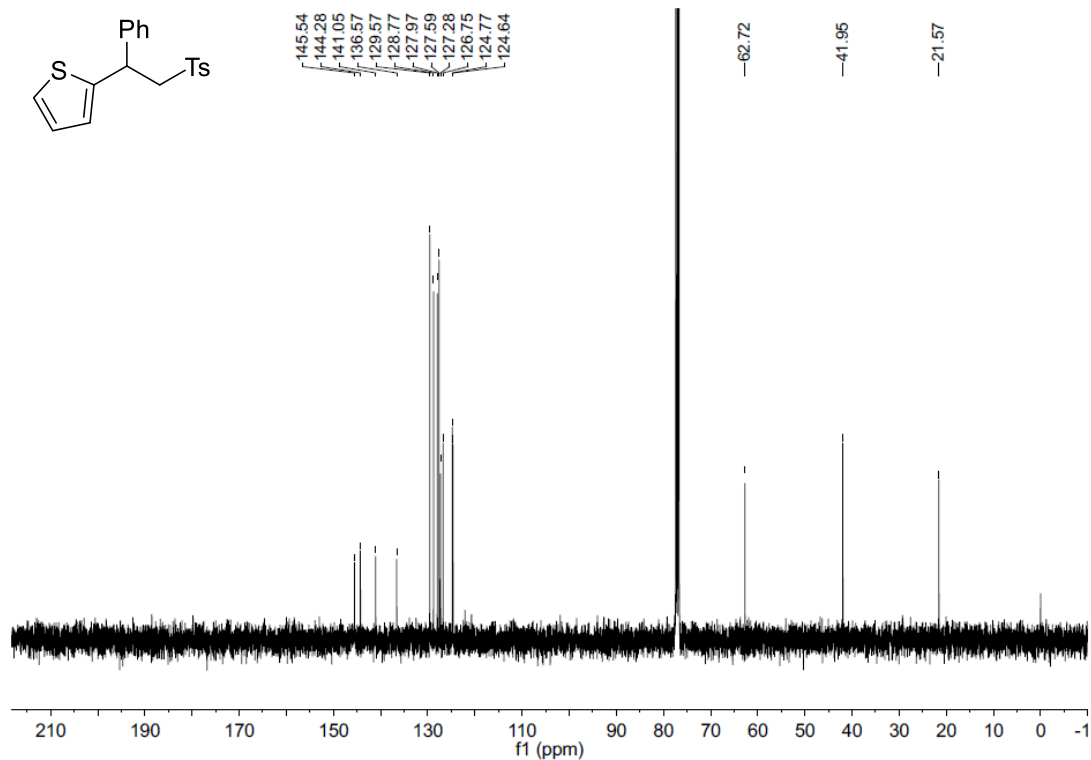

**$^1\text{H}$  NMR ( $\text{CDCl}_3$ , 400 MHz) of 3-(1-Phenyl-2-tosylethyl)thiophene (4am) (from 3-vinylthiophene)**

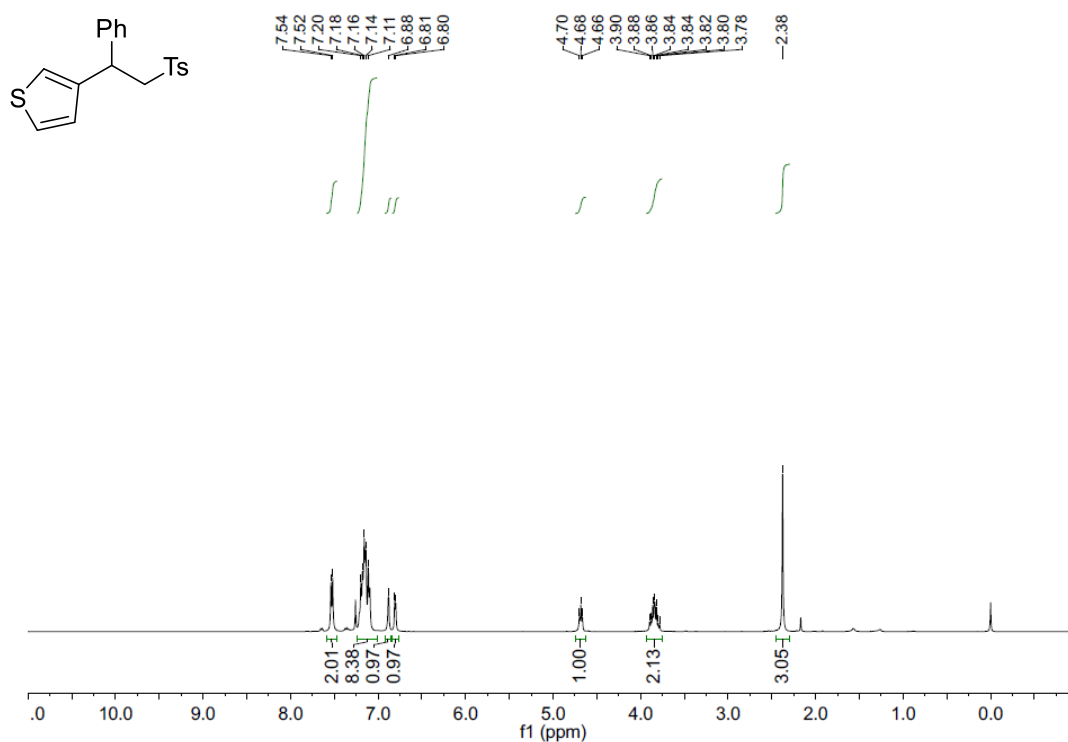

**$^{13}\text{C}$  NMR ( $\text{CDCl}_3$ , 100 MHz) of 3-(1-Phenyl-2-tosylethyl)thiophene (4am) (from 3-vinylthiophene)**

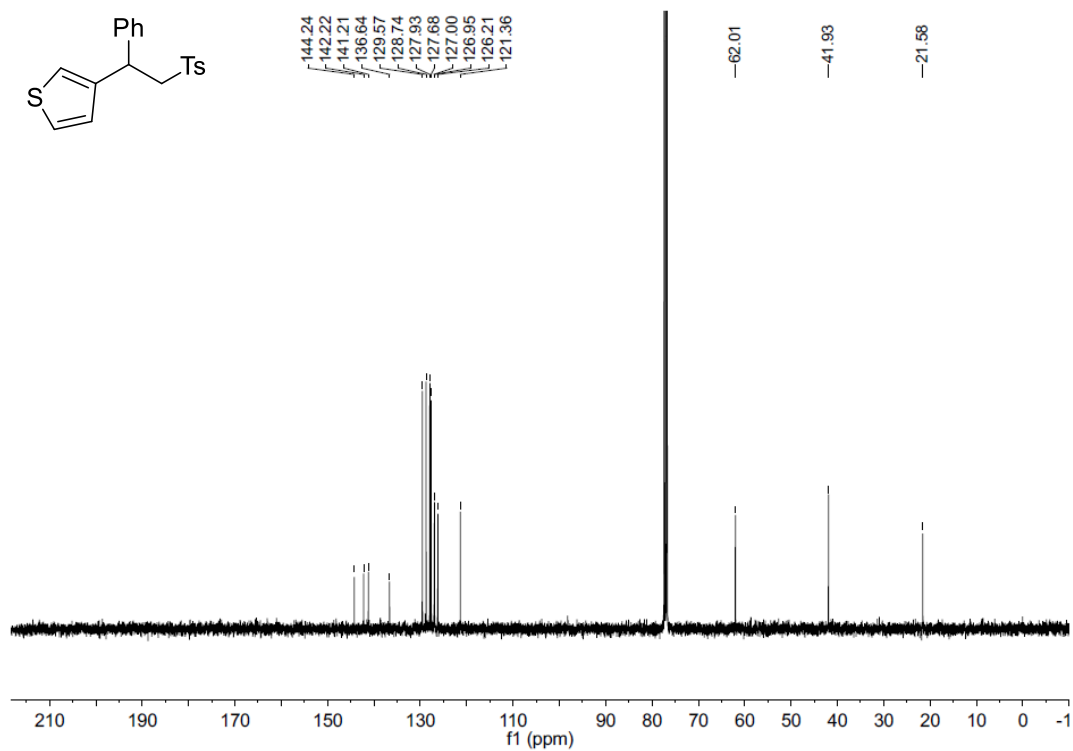

**$^1\text{H}$  NMR ( $\text{CDCl}_3$ , 400 MHz) of 4-Methyl-5-(1-phenyl-2-tosylethyl)thiazole (5aj)**

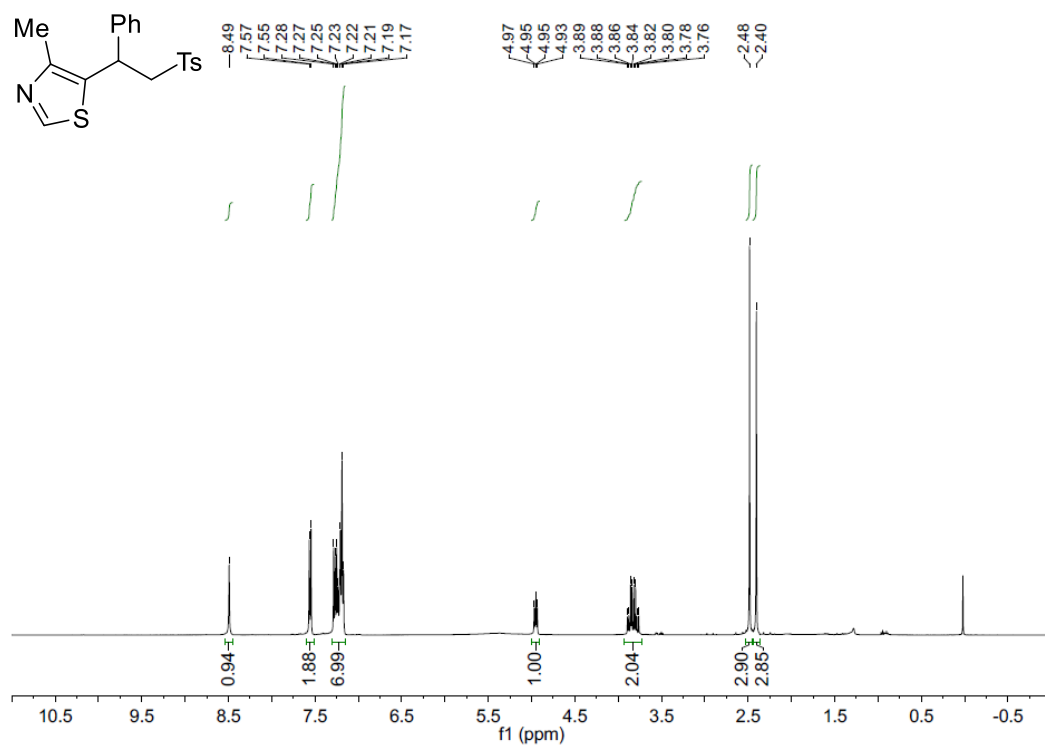

**$^{13}\text{C}$  NMR ( $\text{CDCl}_3$ , 100 MHz) of 4-Methyl-5-(1-phenyl-2-tosylethyl)thiazole (5aj)**

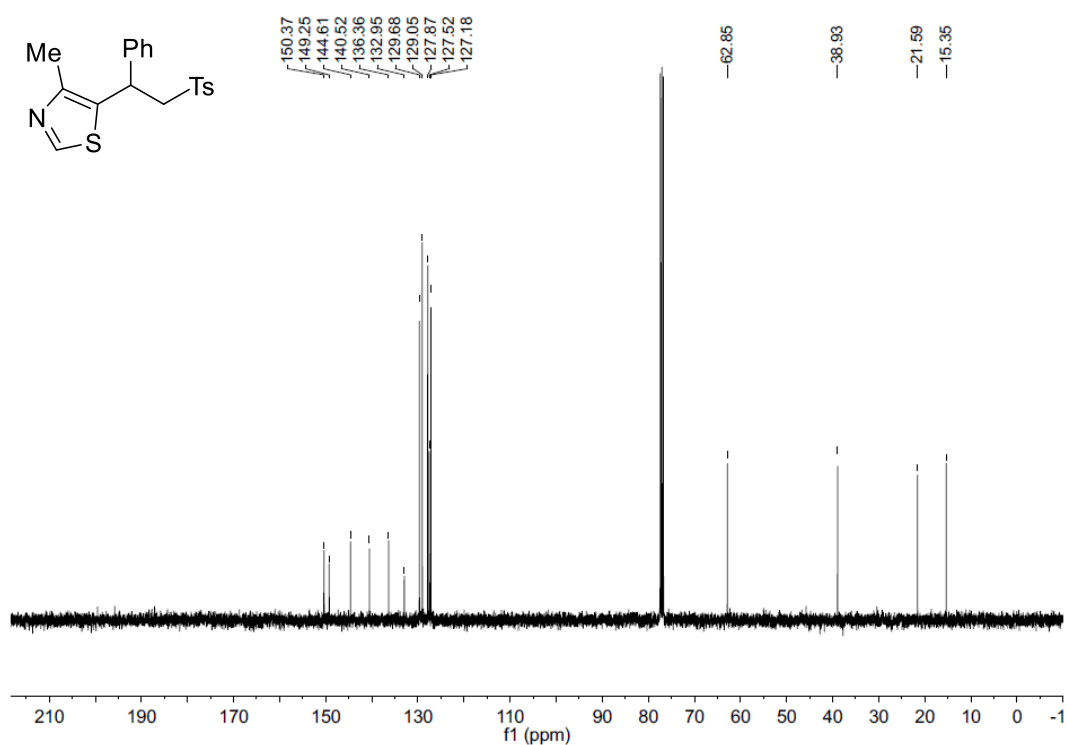

**<sup>1</sup>H NMR (CDCl<sub>3</sub>, 400 MHz) of 5-(1-Phenyl-2-tosylethyl)furan-2-carbaldehyde (5ak)**

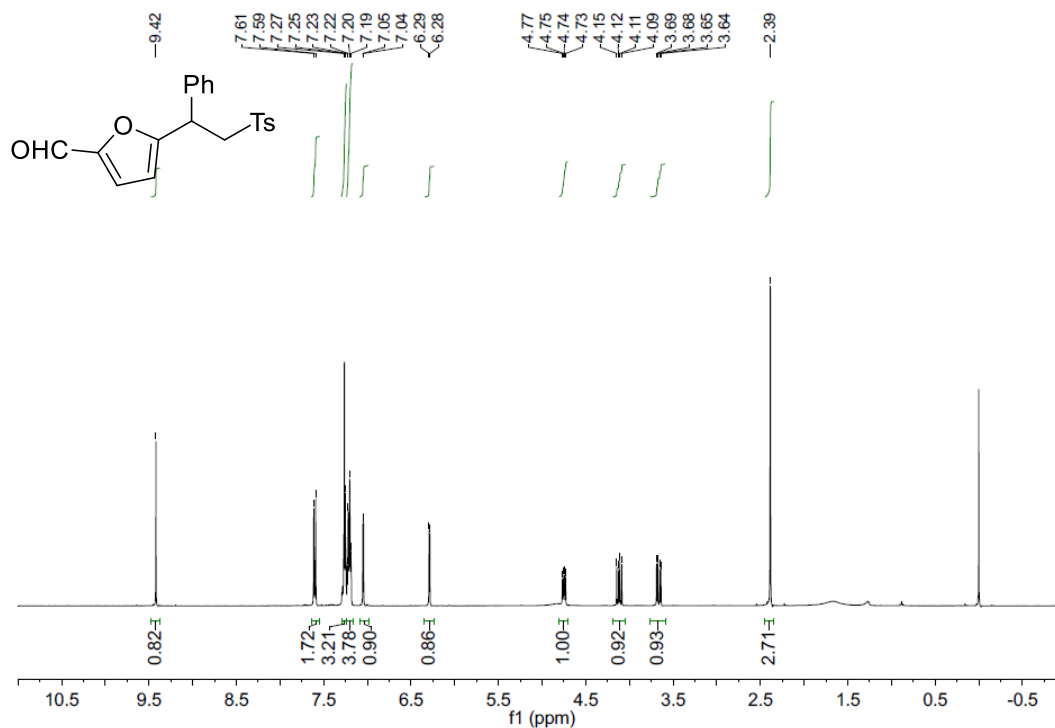

**<sup>13</sup>C NMR (CDCl<sub>3</sub>, 100 MHz) of 5-(1-Phenyl-2-tosylethyl)furan-2-carbaldehyde (5ak)**

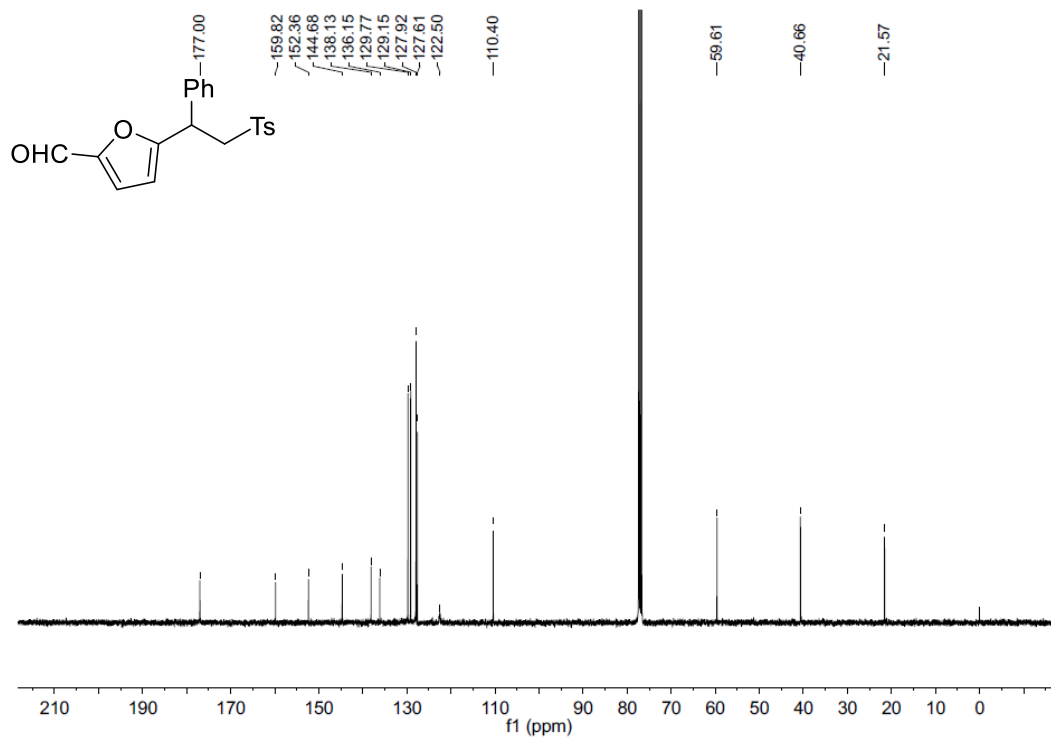

**<sup>1</sup>H NMR (CDCl<sub>3</sub>, 400 MHz) of 5-(1-Phenyl-2-tosylethyl)quinolone (5al)**

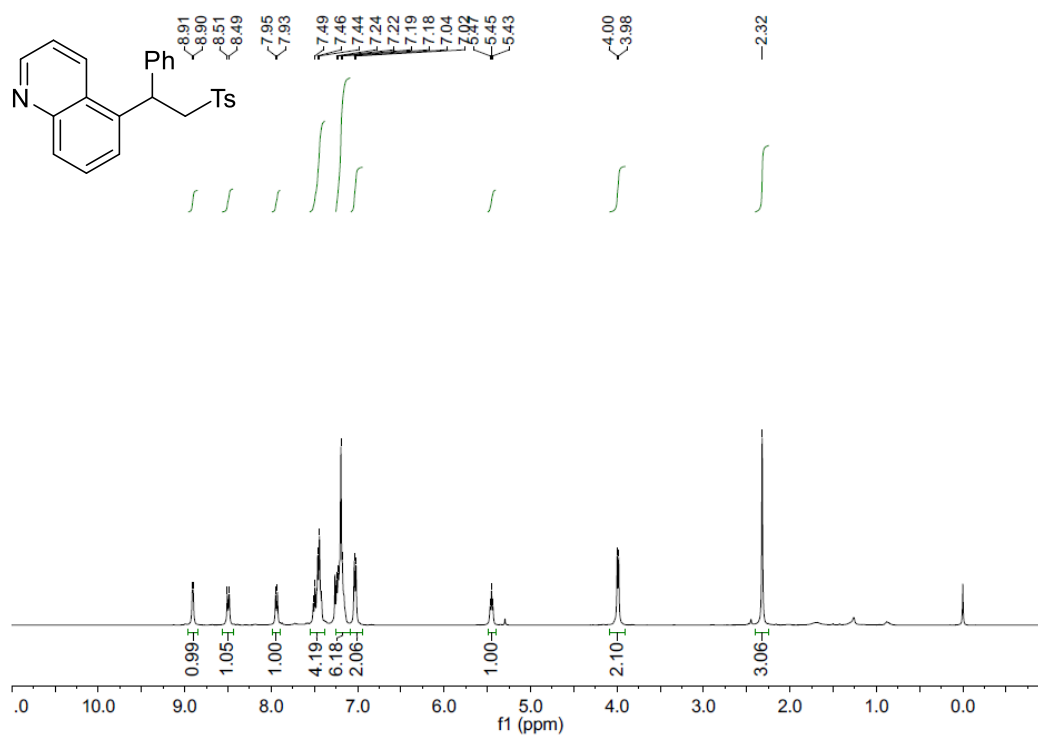

**<sup>13</sup>C NMR (CDCl<sub>3</sub>, 100 MHz) of 5-(1-Phenyl-2-tosylethyl)quinolone (5al)**

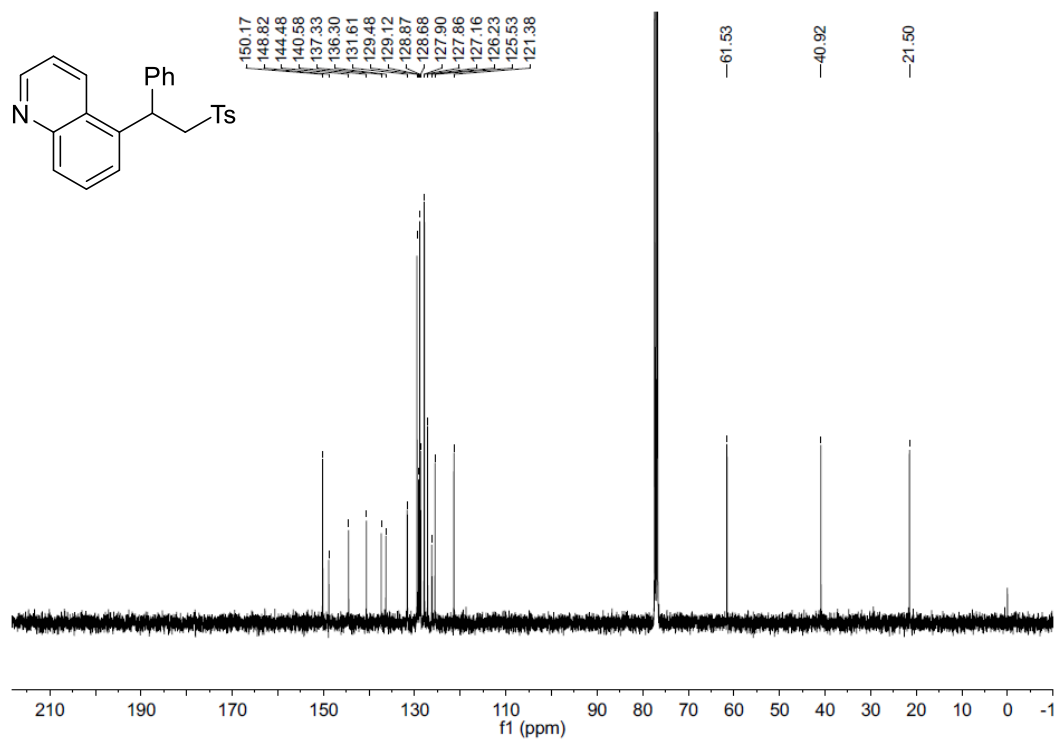



**$^1\text{H}$  NMR ( $\text{CDCl}_3$ , 400 MHz) of 5-(1-Phenyl-2-tosylethyl)isoquinoline (5am)**

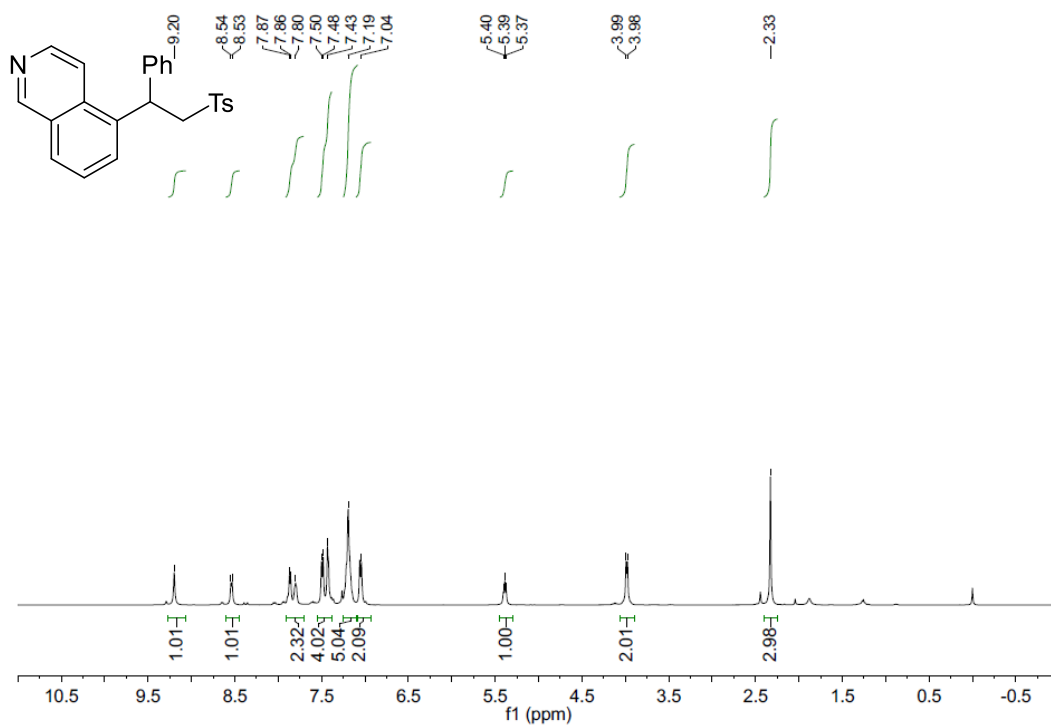

**$^{13}\text{C}$  NMR ( $\text{CDCl}_3$ , 100 MHz) of 5-(1-phenyl-2-tosylethyl)isoquinoline (5am)**

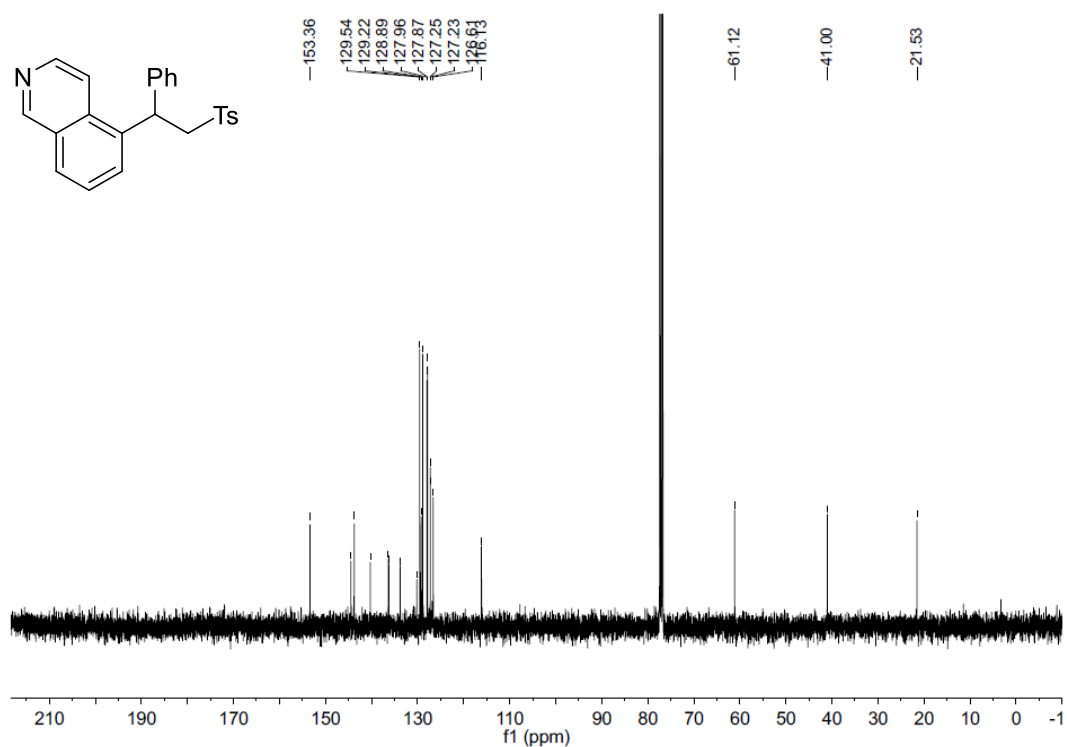

**<sup>1</sup>H NMR (CDCl<sub>3</sub>, 400 MHz) of 5-(1-Phenyl-2-tosylethyl)-1-tosyl-1*H*-indole (5an)**

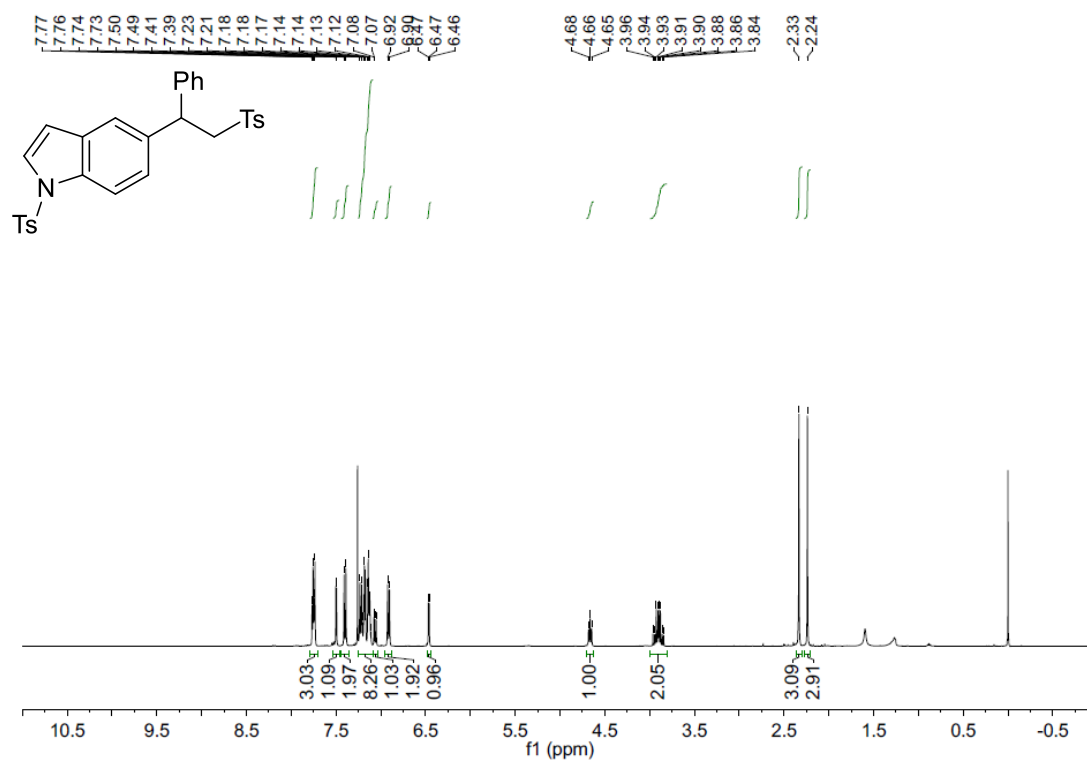

**<sup>13</sup>C NMR (CDCl<sub>3</sub>, 100 MHz) of 5-(1-Phenyl-2-tosylethyl)-1-tosyl-1*H*-indole (5an)**

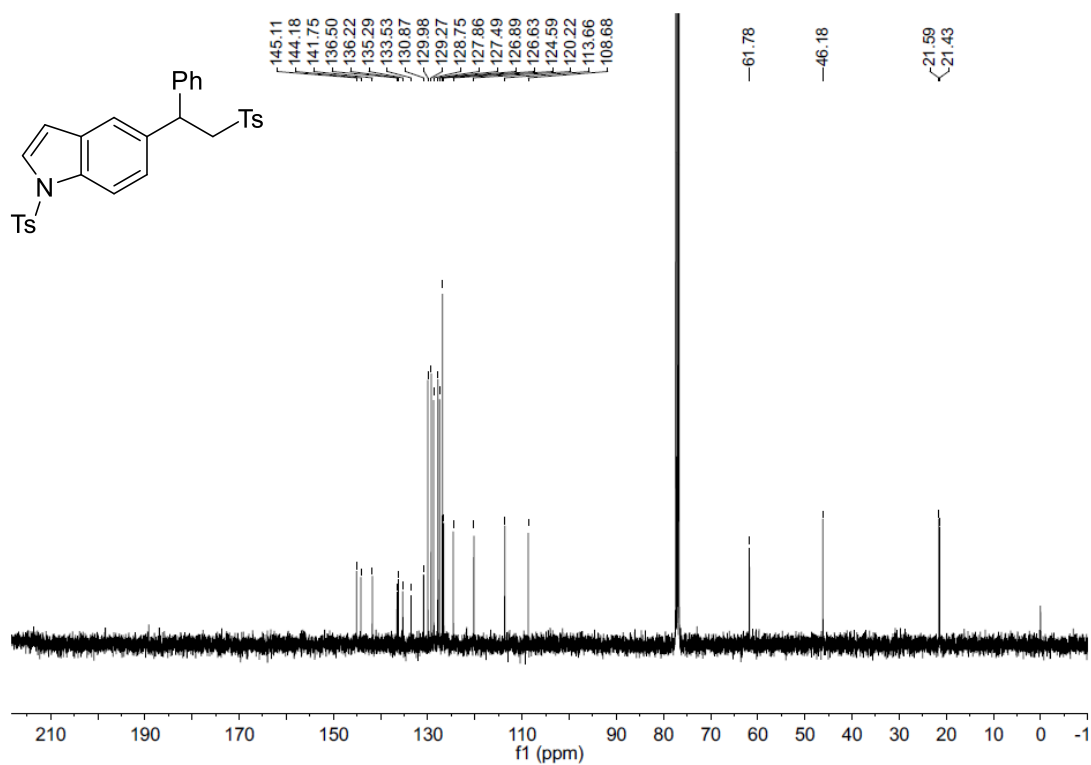

**<sup>1</sup>H NMR (CDCl<sub>3</sub>, 400 MHz) of (1*S*,2*S*)-1-Phenyl-2-tosyl-2,3-dihydro-1*H*- indene (5ao)**

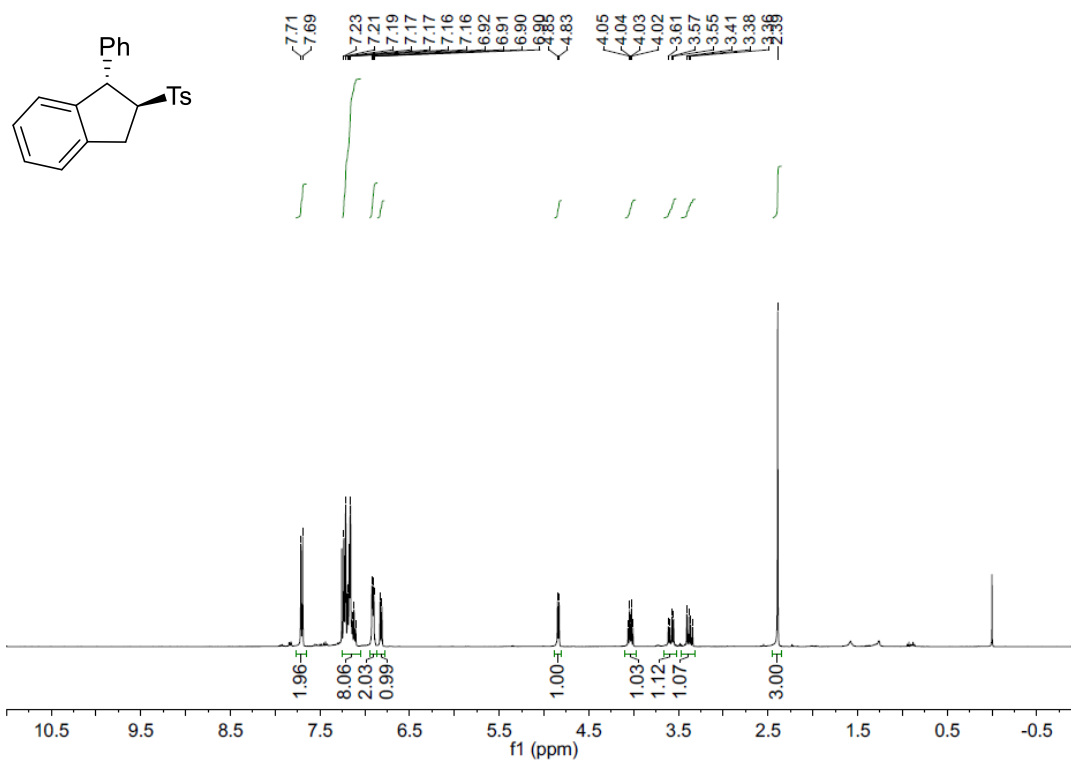

**<sup>13</sup>C NMR (CDCl<sub>3</sub>, 100 MHz) of (1*S*,2*S*)-1-Phenyl-2-tosyl-2,3-dihydro-1*H*-indene (5ao)**

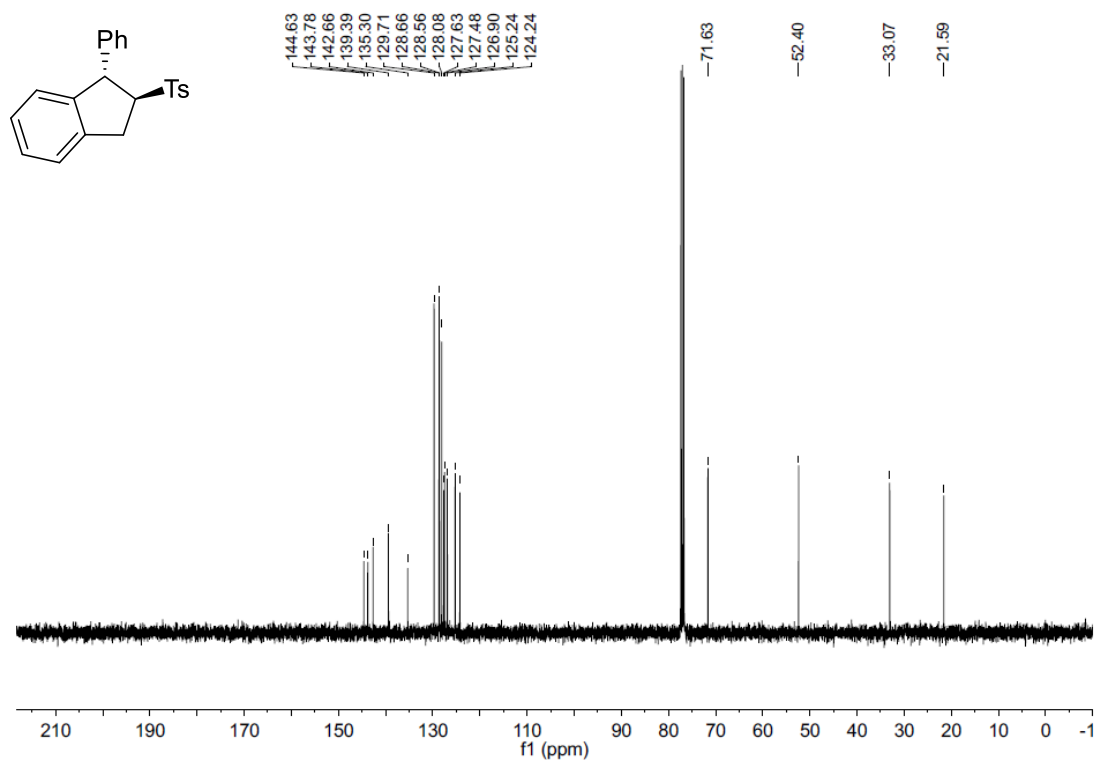

**$^1\text{H}$  NMR ( $\text{CDCl}_3$ , 400 MHz) of (2-(Phenylsulfonyl)ethane-1,1-diyl)dibenzene (6aa)**

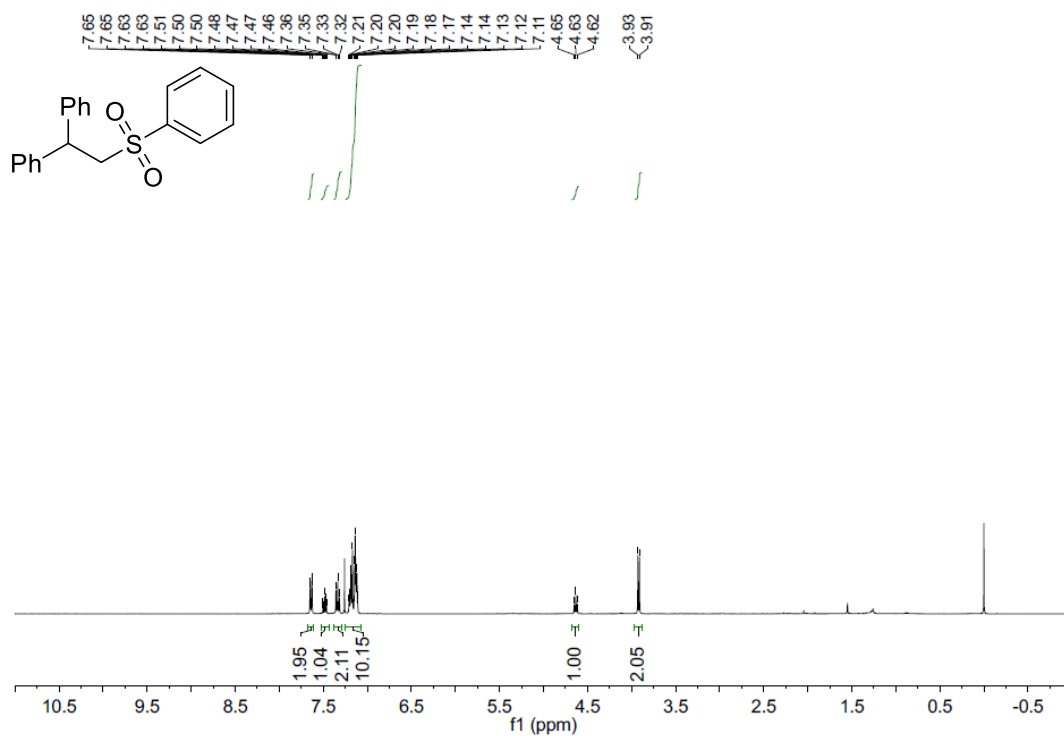

**$^{13}\text{C}$  NMR ( $\text{CDCl}_3$ , 100 MHz) of (2-(Phenylsulfonyl)ethane-1,1-diyl)dibenzene (6aa)**

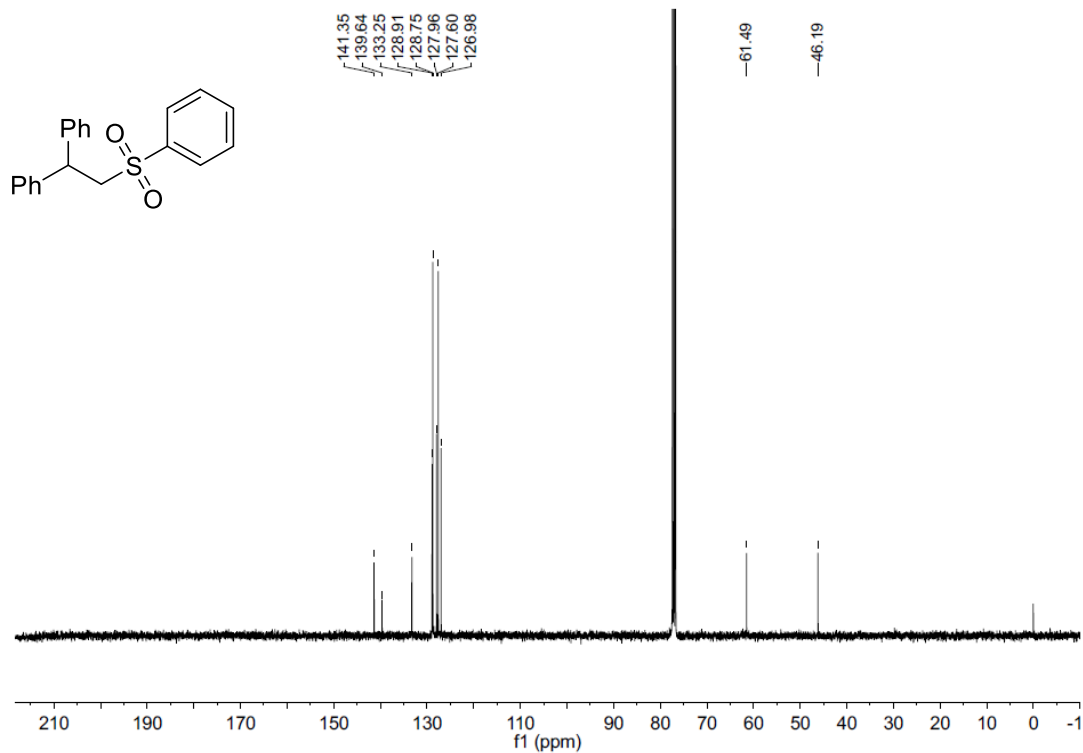

**$^1\text{H}$  NMR ( $\text{CDCl}_3$ , 400 MHz) of (2-((4-Methoxyphenyl)sulfonyl)ethane-1,1-diyl) dibenzene (6ab)**

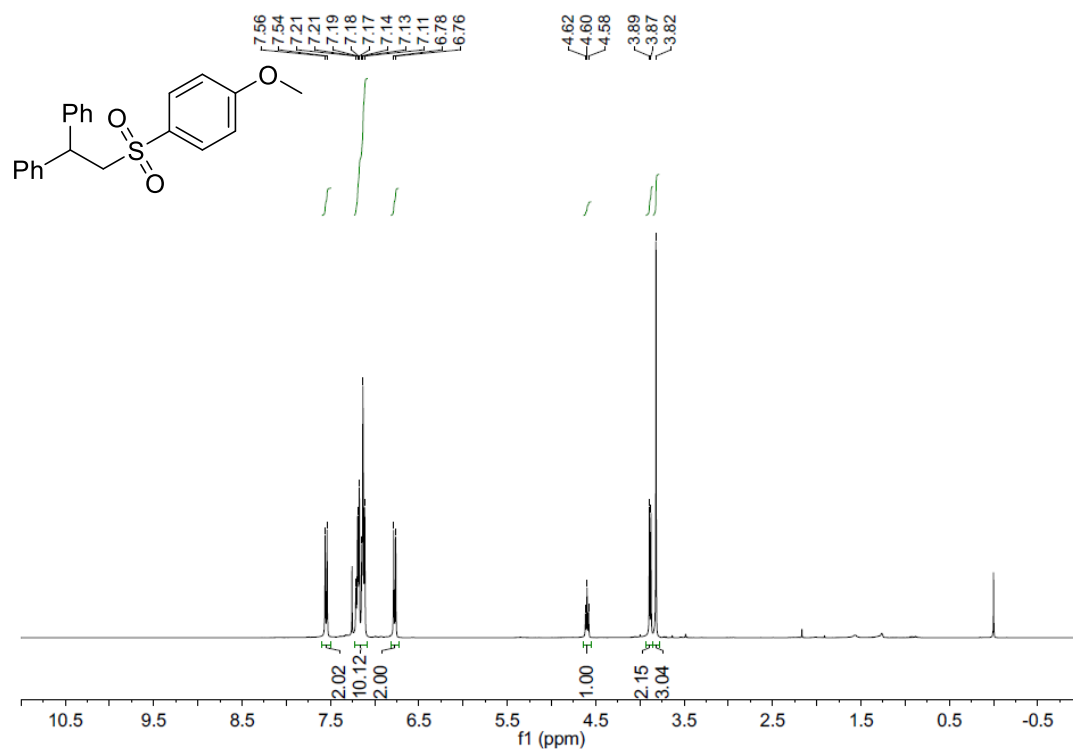

**$^{13}\text{C}$  NMR ( $\text{CDCl}_3$ , 100 MHz) of (2-((4-Methoxyphenyl)sulfonyl)ethane-1,1-diyl) dibenzene (6ab)**

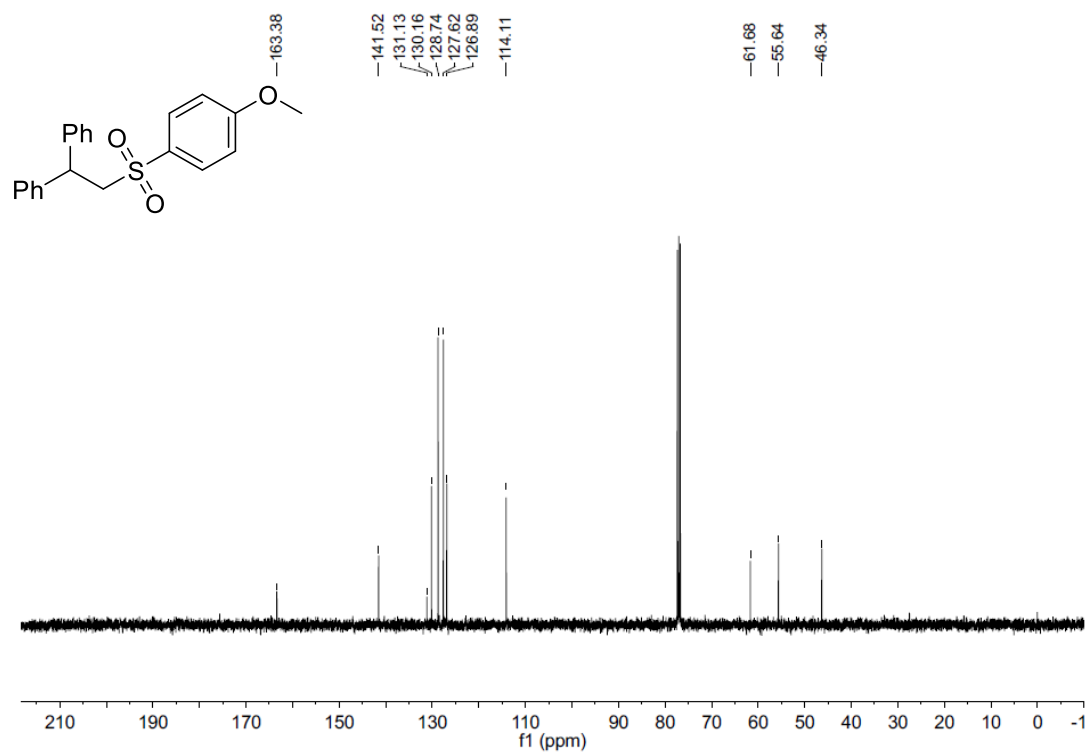

**$^1\text{H}$  NMR ( $\text{CDCl}_3$ , 400 MHz) of (2-((4-Fluorophenyl)sulfonyl)ethane-1,1-diyl)dibenzene (6ac)**

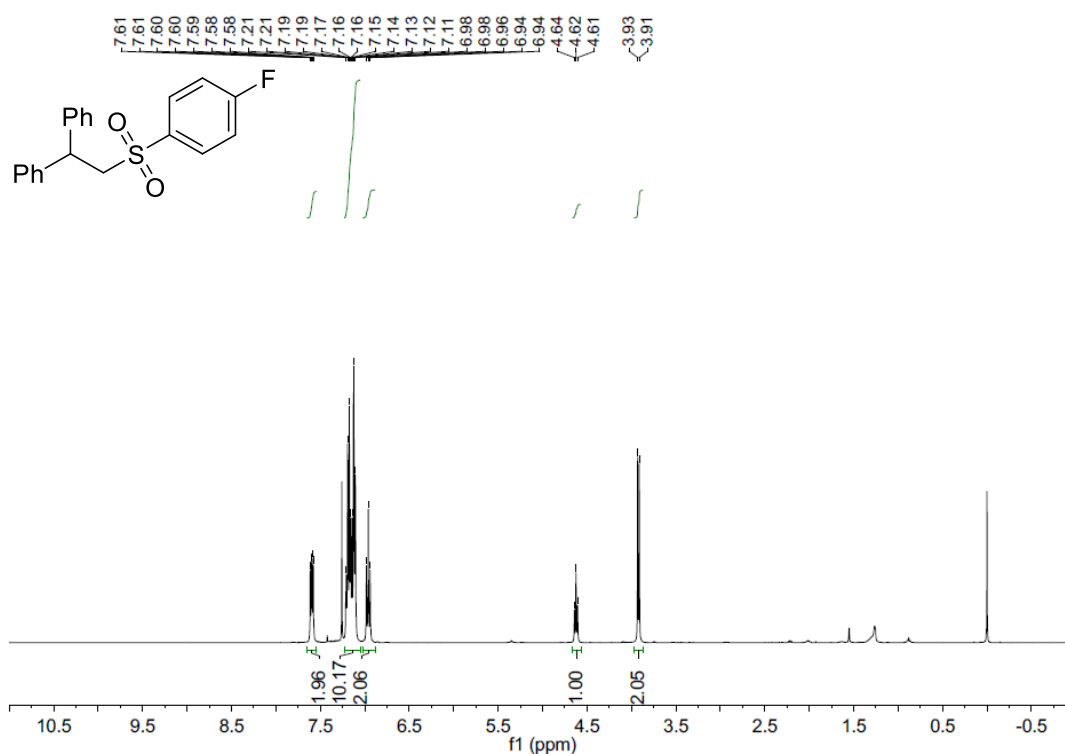

**$^{13}\text{C}$  NMR ( $\text{CDCl}_3$ , 100 MHz) of (2-((4-Fluorophenyl)sulfonyl)ethane-1,1-diyl)dibenzene (6ac)**

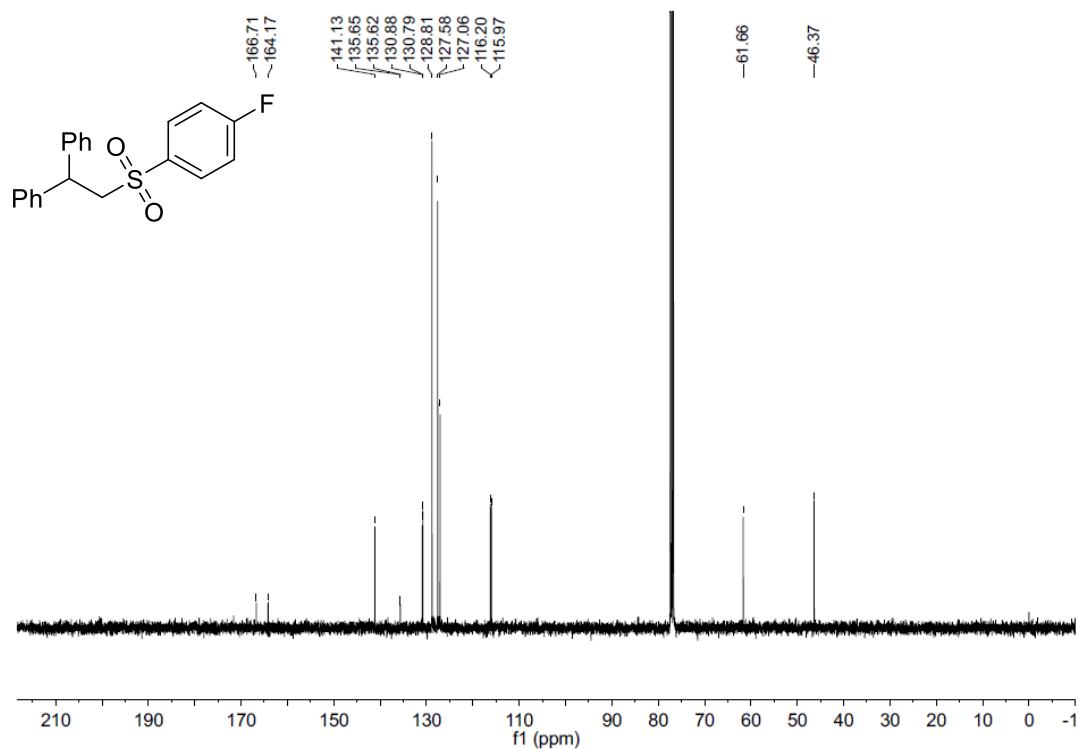

**$^1\text{H}$  NMR ( $\text{CDCl}_3$ , 400 MHz) of (2-((4-Chlorophenyl)sulfonyl)ethane-1,1-diyl) dibenzene (6ad)**

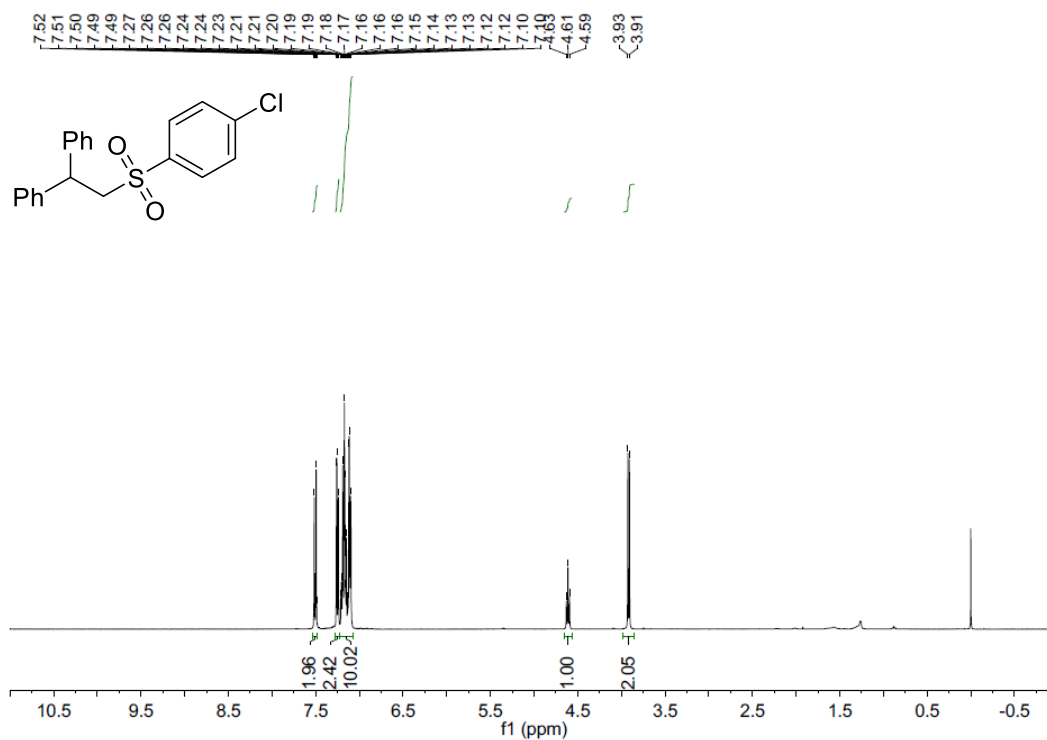

**$^{13}\text{C}$  NMR ( $\text{CDCl}_3$ , 100 MHz) of (2-((4-Chlorophenyl)sulfonyl)ethane-1,1-diyl) dibenzene (6ad)**

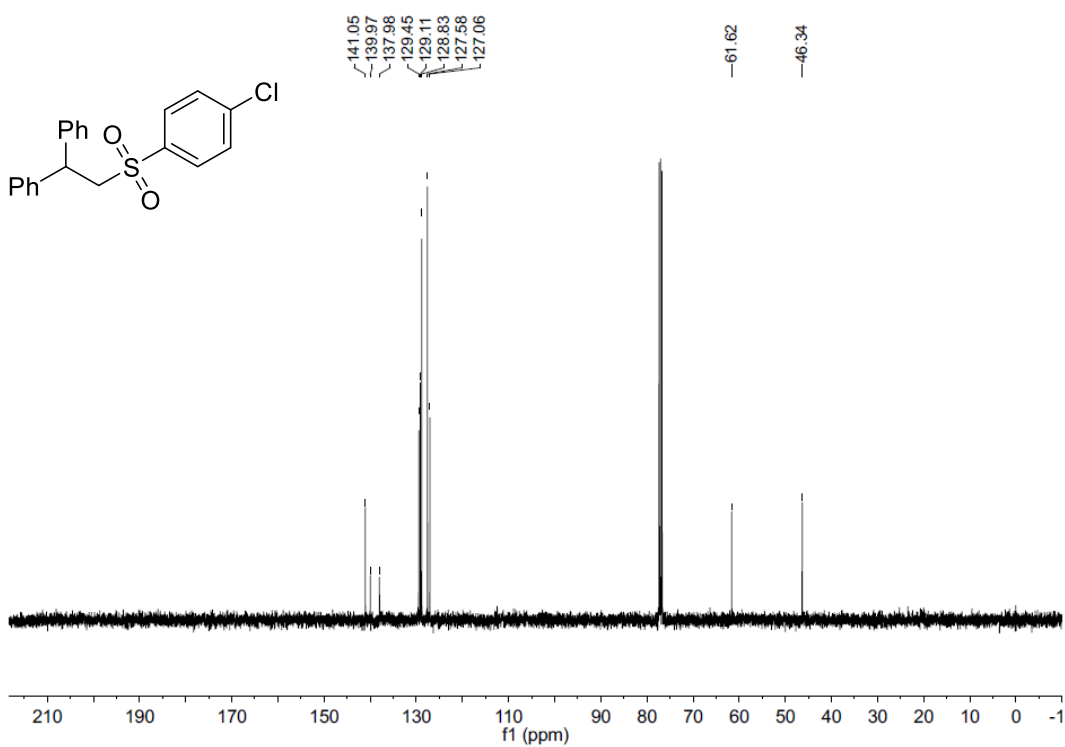

**$^1\text{H}$  NMR ( $\text{CDCl}_3$ , 400 MHz) of (2-((4-Bromophenyl)sulfonyl)ethane-1,1-diyl) dibenzene (6ae)**

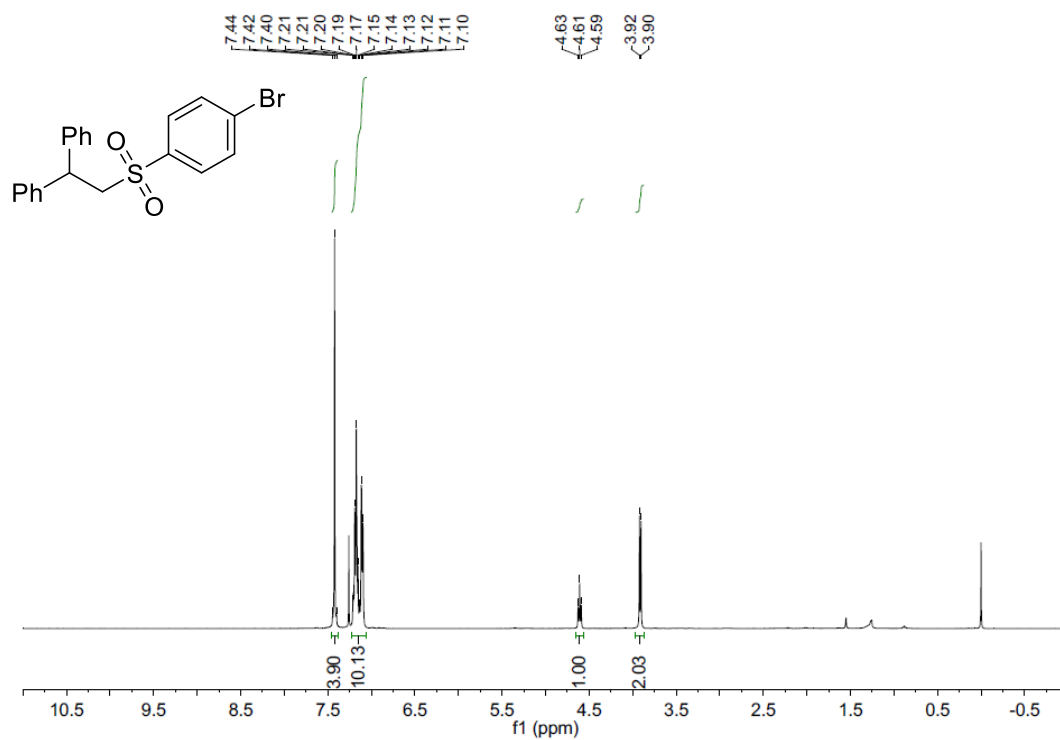

**$^{13}\text{C}$  NMR ( $\text{CDCl}_3$ , 100 MHz) of (2-((4-Bromophenyl)sulfonyl)ethane-1,1-diyl) dibenzene (6ae)**

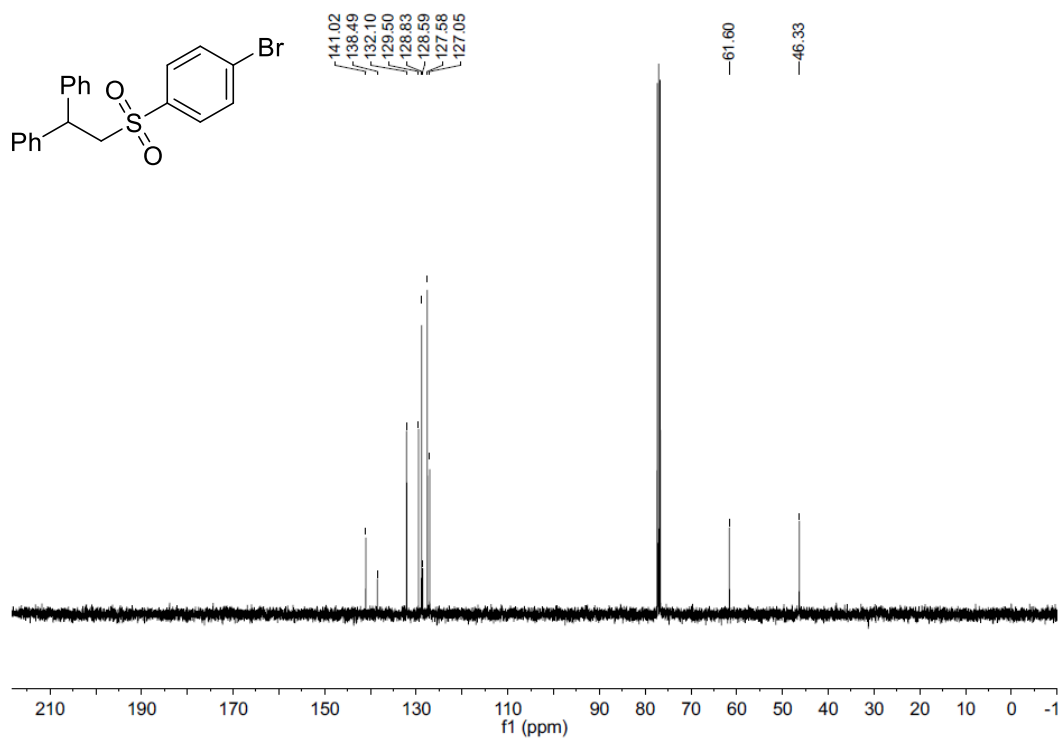



**<sup>1</sup>H NMR (CDCl<sub>3</sub>, 400 MHz) of (2-((4-(Trifluoromethyl)phenyl)sulfonyl)ethane-1,1-diyl)dibenzene (6af)**

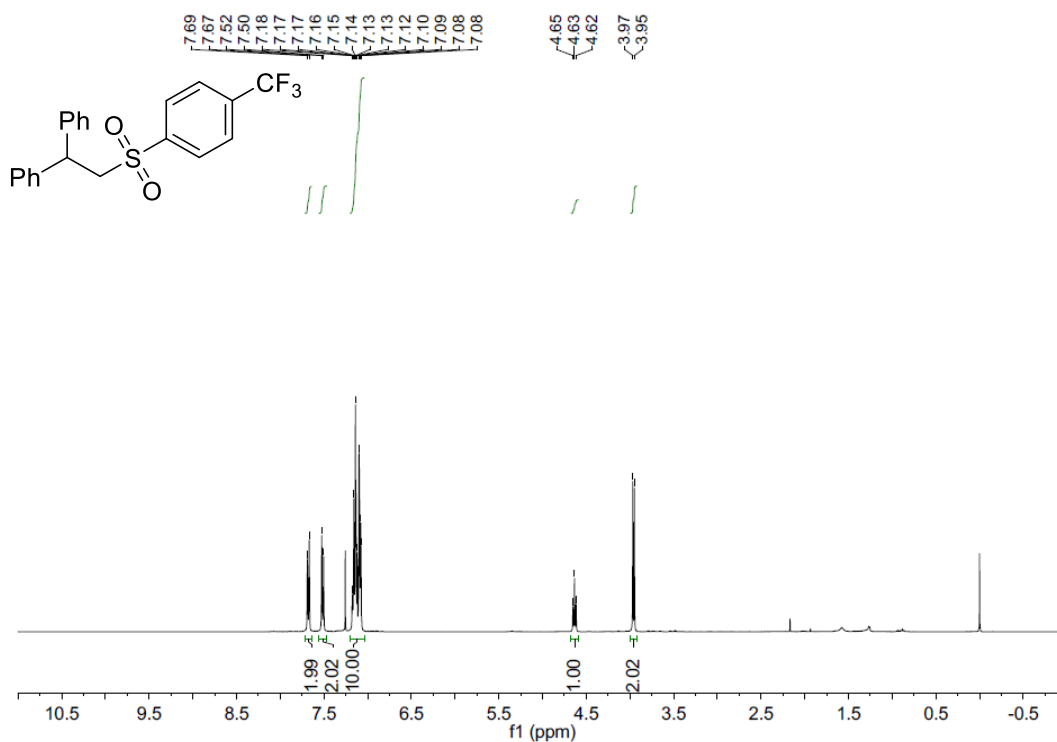

**<sup>13</sup>C NMR (CDCl<sub>3</sub>, 100 MHz) of (2-((4-(Trifluoromethyl)phenyl)sulfonyl)ethane-1,1-diyl)dibenzene (6af)**

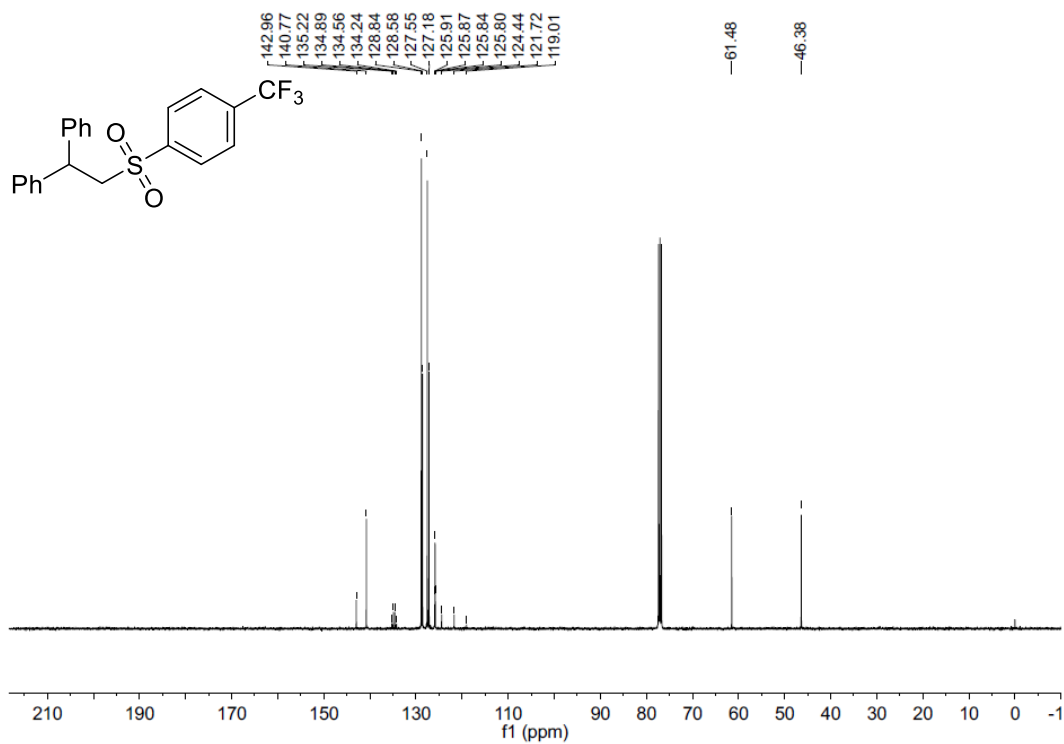

**<sup>1</sup>H NMR (CDCl<sub>3</sub>, 400 MHz) of (2-(*o*-Tolylsulfonyl)ethane-1,1-diyl)dibenzene (6ag)**

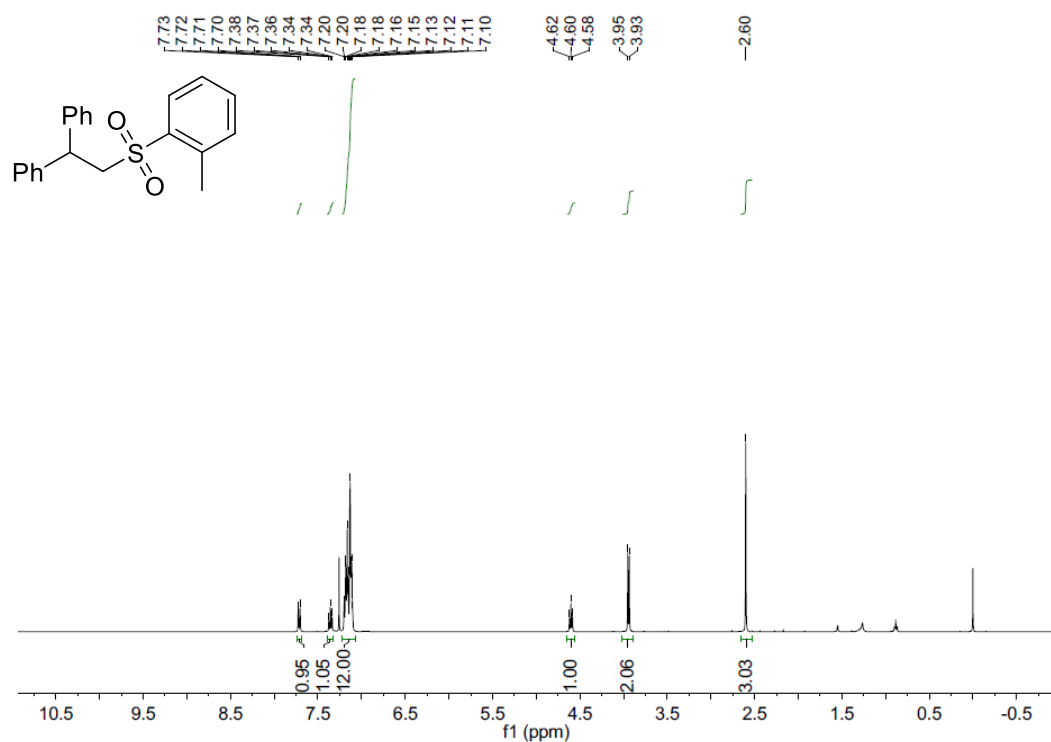

**<sup>13</sup>C NMR (CDCl<sub>3</sub>, 100 MHz) of (2-(*o*-Tolylsulfonyl)ethane-1,1-diyl)dibenzene (6ag)**

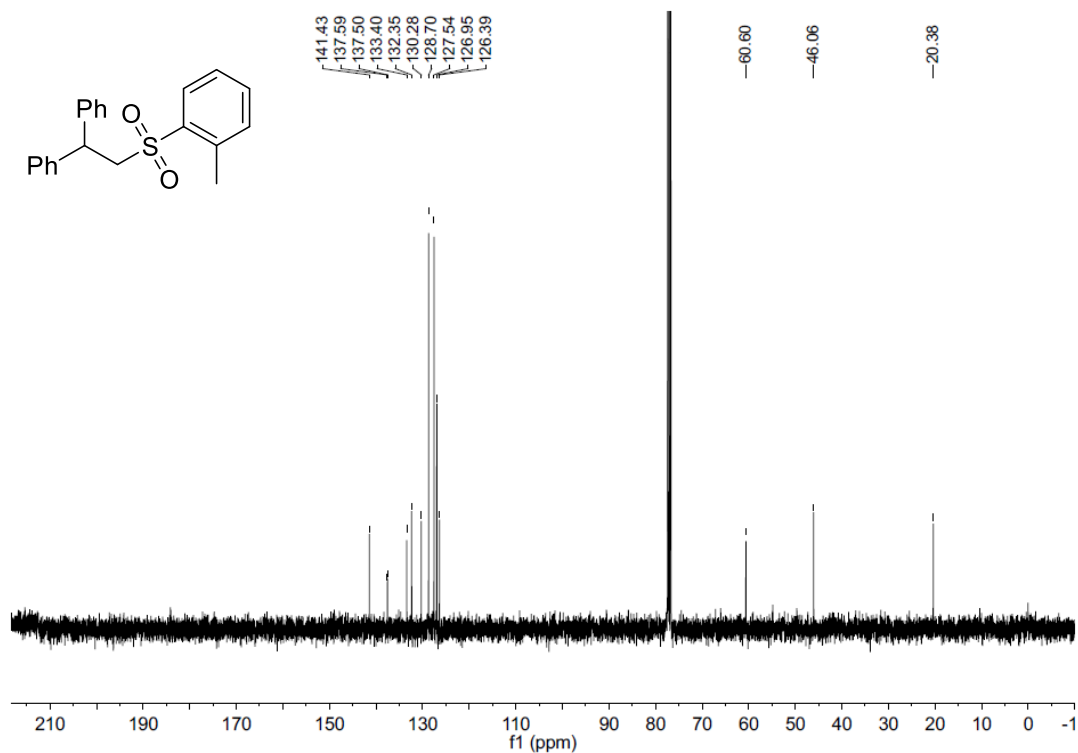

**<sup>1</sup>H NMR (CDCl<sub>3</sub>, 400 MHz) of 1-(4-((2,2-Diphenylethyl)sulfonyl)phenyl)ethan-1-one (6ah)**

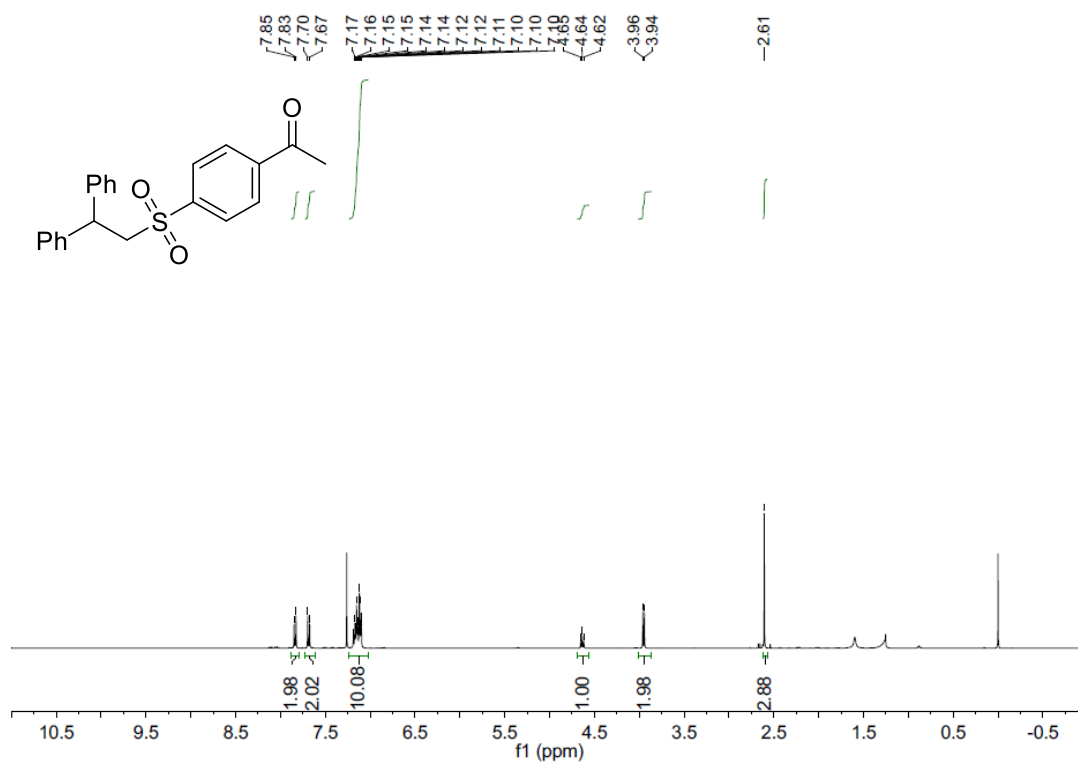

**<sup>13</sup>C NMR (CDCl<sub>3</sub>, 100 MHz) of 1-(4-((2,2-Diphenylethyl)sulfonyl)phenyl)ethan-1-one (6ah)**

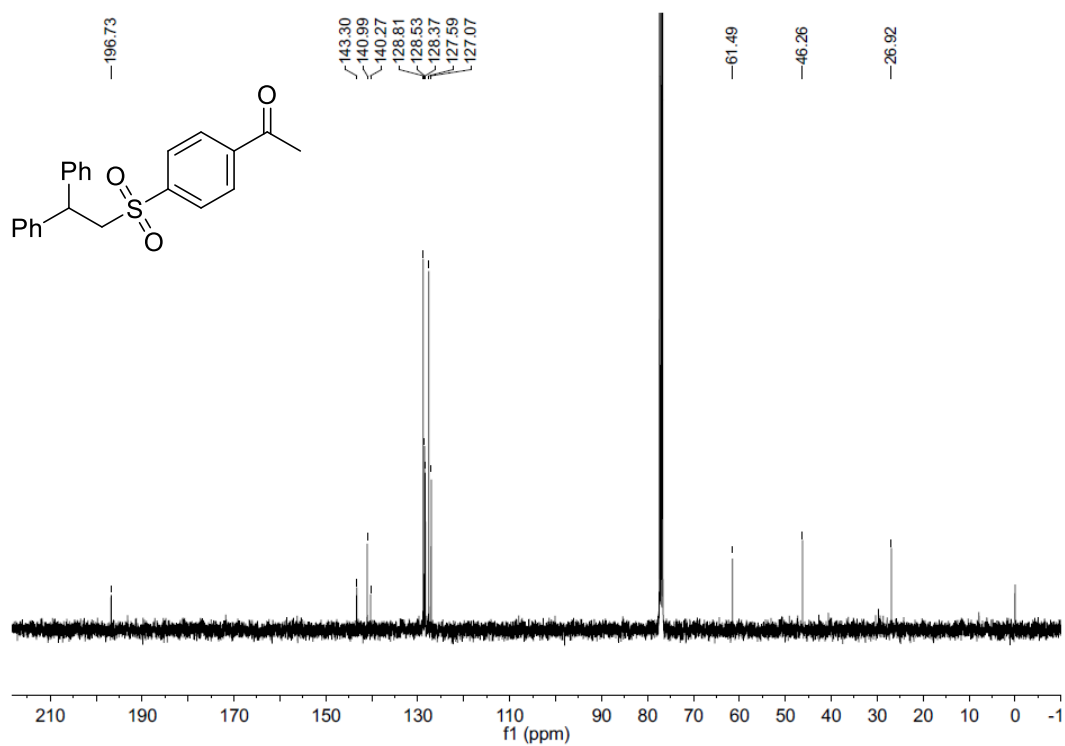

**$^1\text{H}$  NMR ( $\text{CDCl}_3$ , 400 MHz) of 2-((2,2-Diphenylethyl)sulfonyl)thiophene (6ai)**

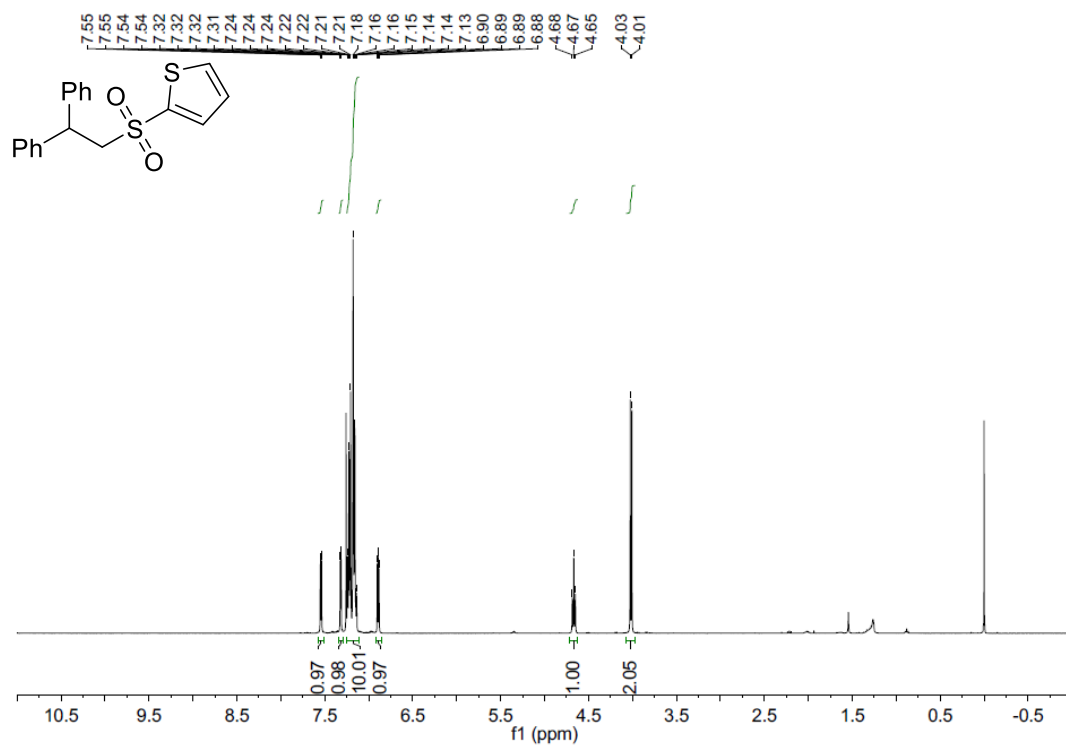

**$^{13}\text{C}$  NMR ( $\text{CDCl}_3$ , 100 MHz) of 2-((2,2-Diphenylethyl)sulfonyl)thiophene (6ai)**

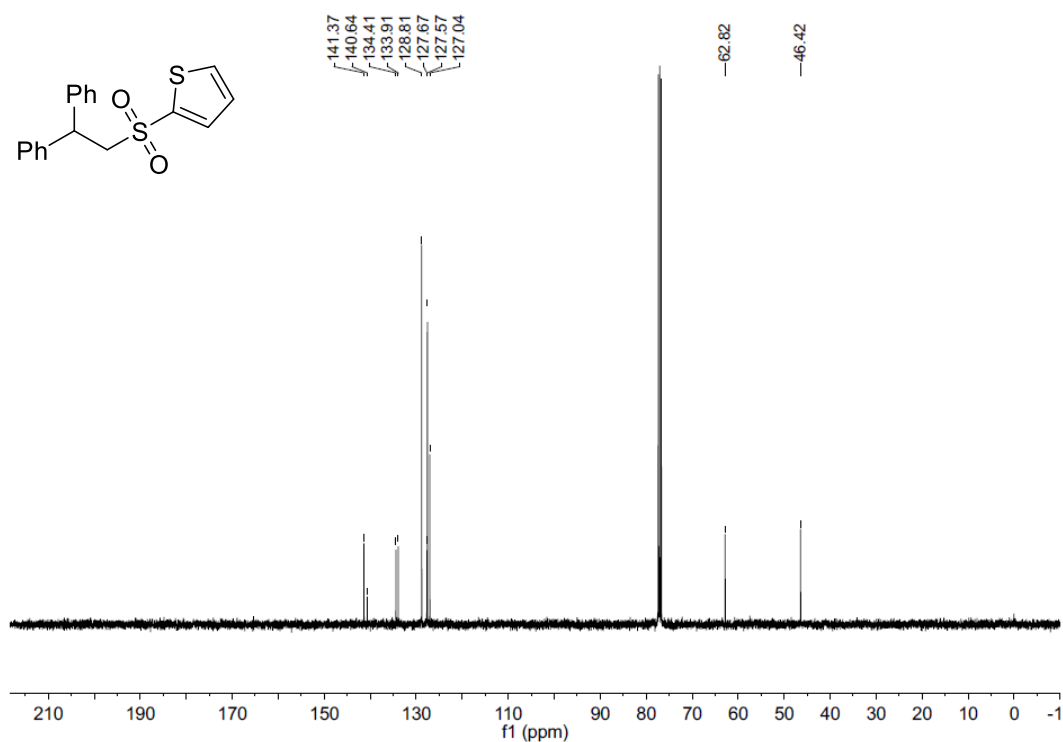

**$^1\text{H}$  NMR ( $\text{CDCl}_3$ , 400 MHz) of (2-(Methylsulfonyl)ethane-1,1-diyl)dibenzene (6aj)**

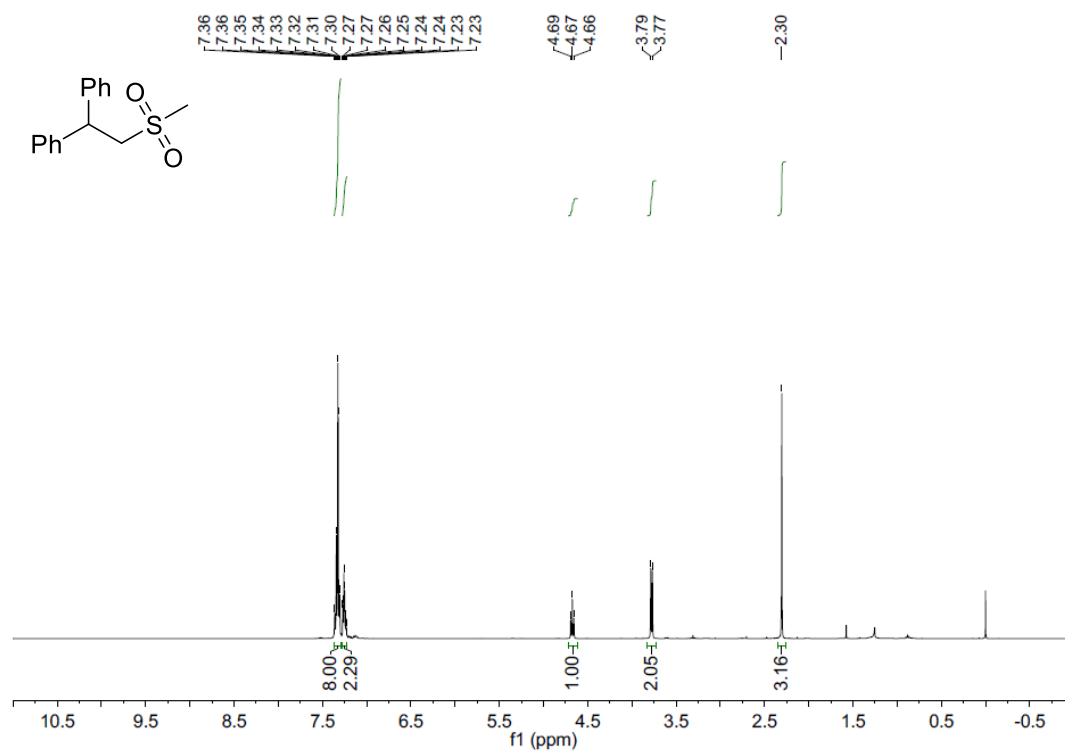

**$^{13}\text{C}$  NMR ( $\text{CDCl}_3$ , 100 MHz) of (2-(Methylsulfonyl)ethane-1,1-diyl)dibenzene (6aj)**

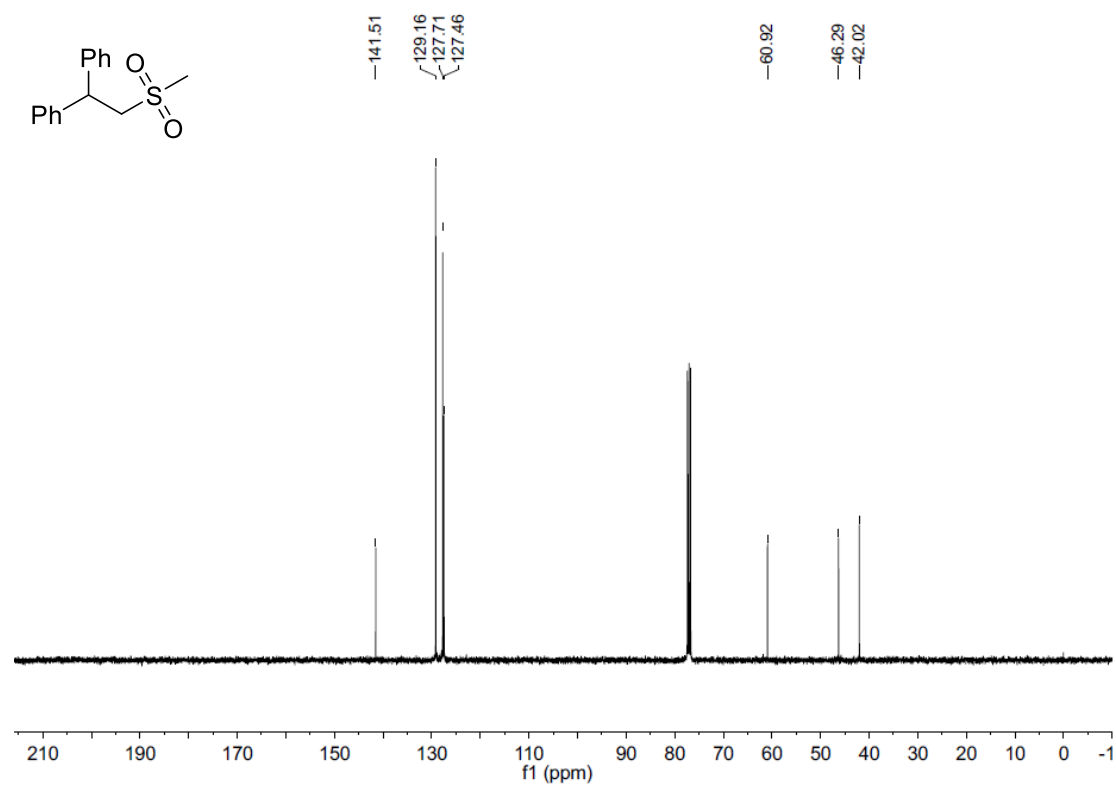

**<sup>1</sup>H NMR (CDCl<sub>3</sub>, 400 MHz) of 3-Phenyl-6-(1-phenyl-2-tosylethyl)-4H-chromen-4-one (5ap)**

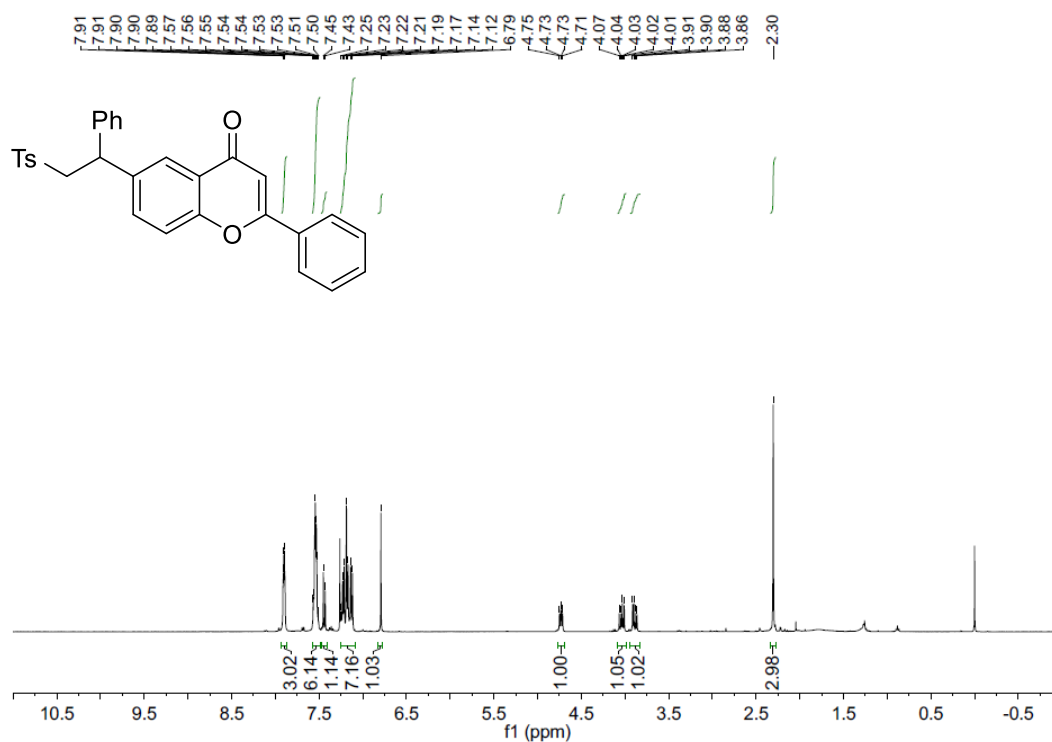

**<sup>13</sup>C NMR (CDCl<sub>3</sub>, 100 MHz) of 3-Phenyl-6-(1-phenyl-2-tosylethyl)-4H-chromen-4-one (5ap)**

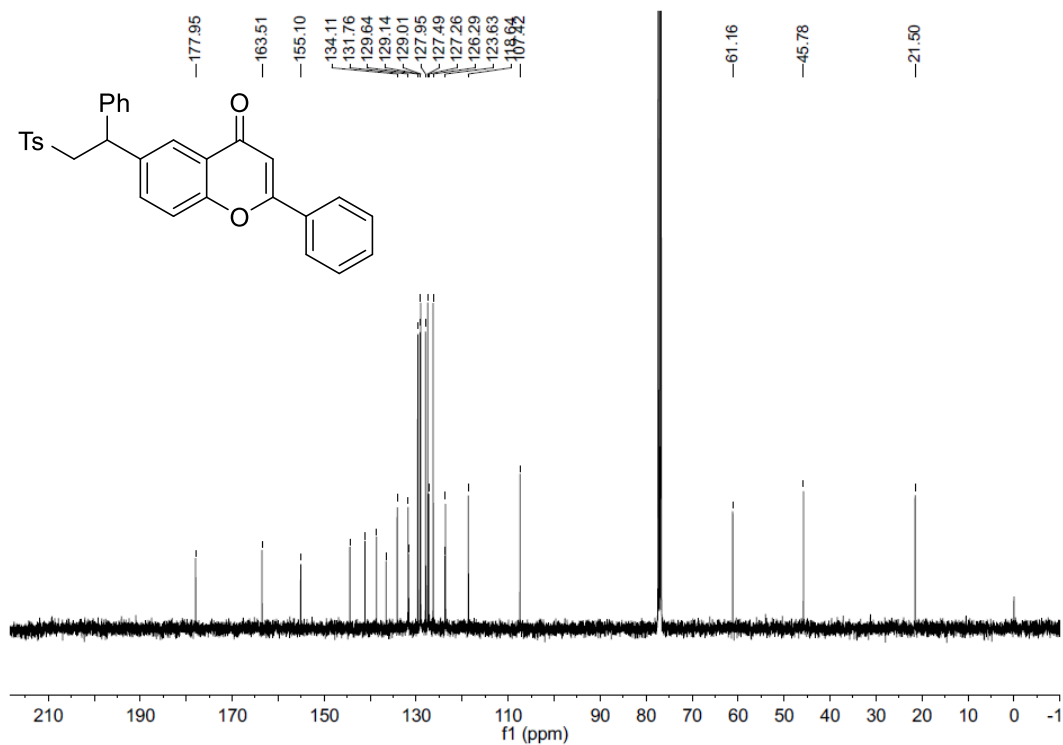

**<sup>1</sup>H NMR (CDCl<sub>3</sub>, 400 MHz) of (8*R*,9*S*,13*S*,14*S*)-13-Methyl-3-(1-phenyl-2-tosylethyl)-6,7,8,9,11,12,13,14,15,16-decahydro-17*H*-cyclopenta[*a*]phenanthren-17-one (5aq)**

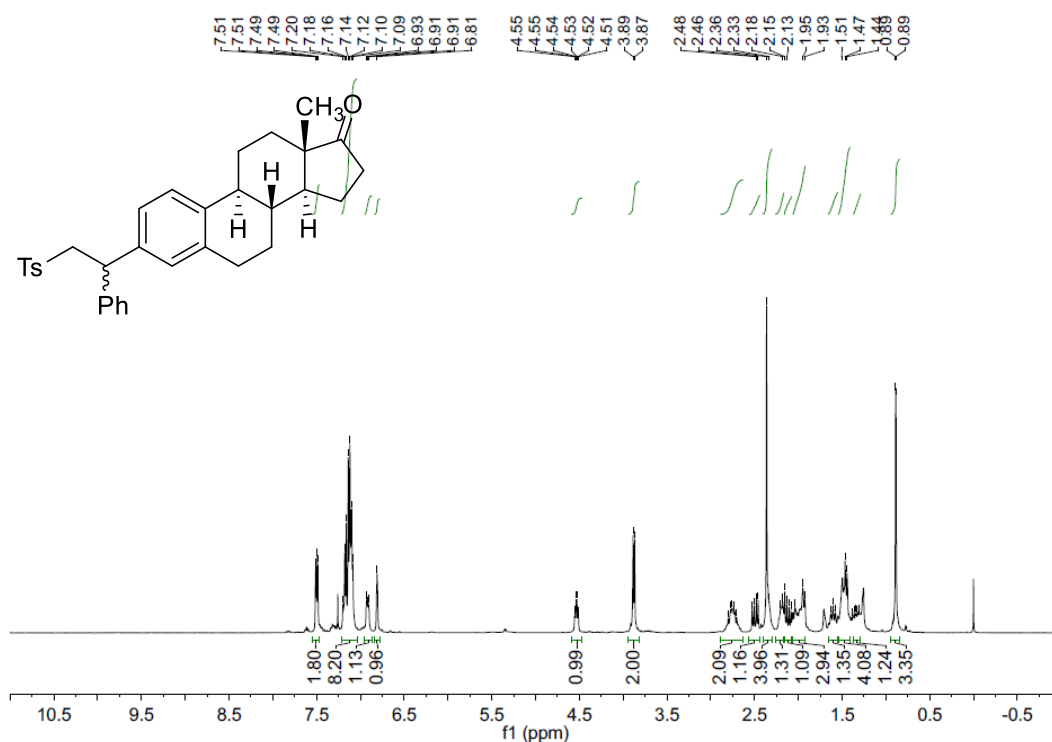

**<sup>13</sup>C NMR (CDCl<sub>3</sub>, 100 MHz) of (8*R*,9*S*,13*S*,14*S*)-13-Methyl-3-(1-phenyl-2-tosylethyl)-6,7,8,9,11,12,13,14,15,16-decahydro-17*H*-cyclopenta[*a*]phenanthren-17-one (5aq)**

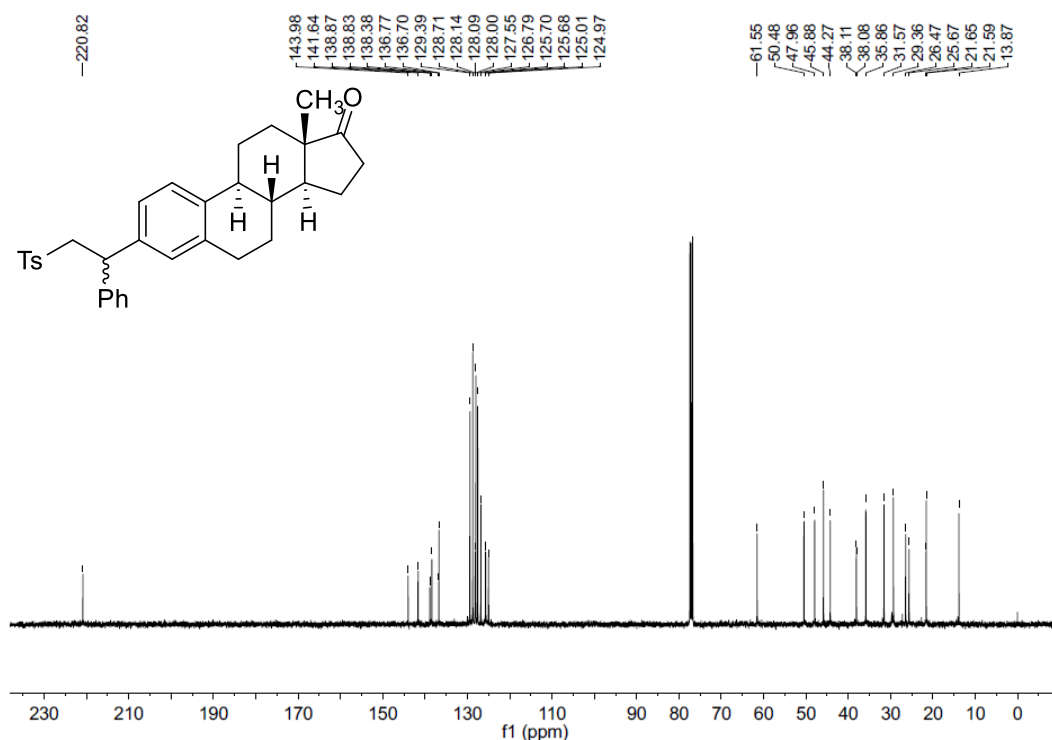

**<sup>1</sup>H NMR (CDCl<sub>3</sub>, 400 MHz) of (2*R*)-2,8-Dimethyl-6-(1-phenyl-2-tosylethyl)-2-((4*R*,8*R*)-4,8,12-trimethyltridecyl)chromane (5ar)**

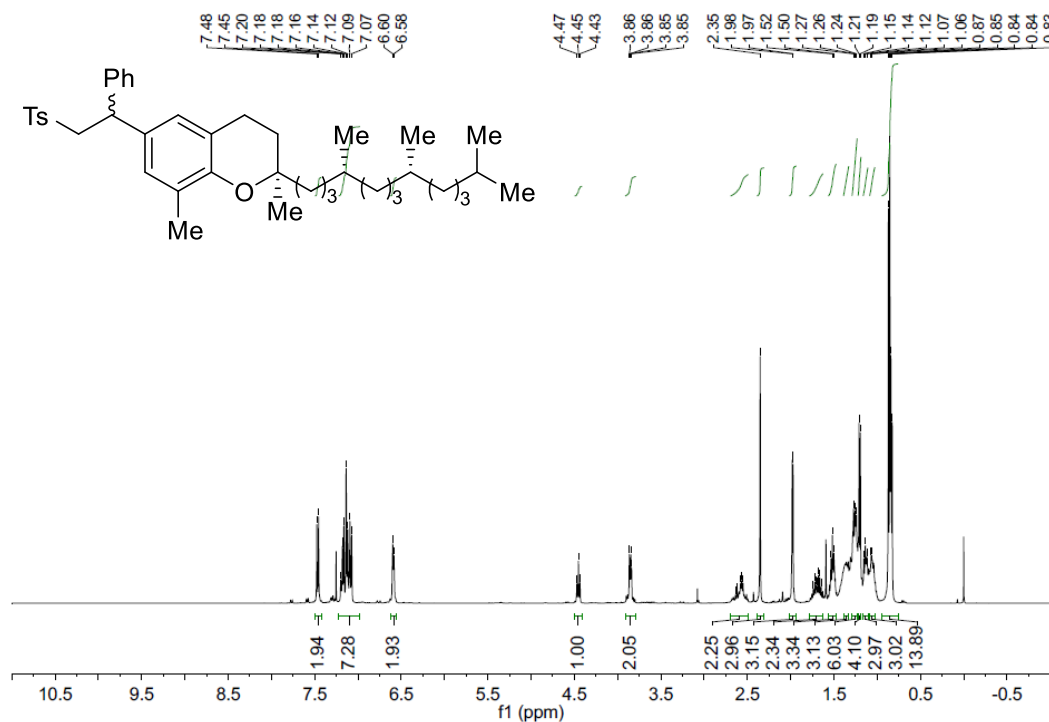

**<sup>13</sup>C NMR (CDCl<sub>3</sub>, 100 MHz) of (2*R*)-2,8-Dimethyl-6-(1-phenyl-2-tosylethyl)-2-((4*R*,8*R*)-4,8,12-trimethyltridecyl)chromane (5ar)**

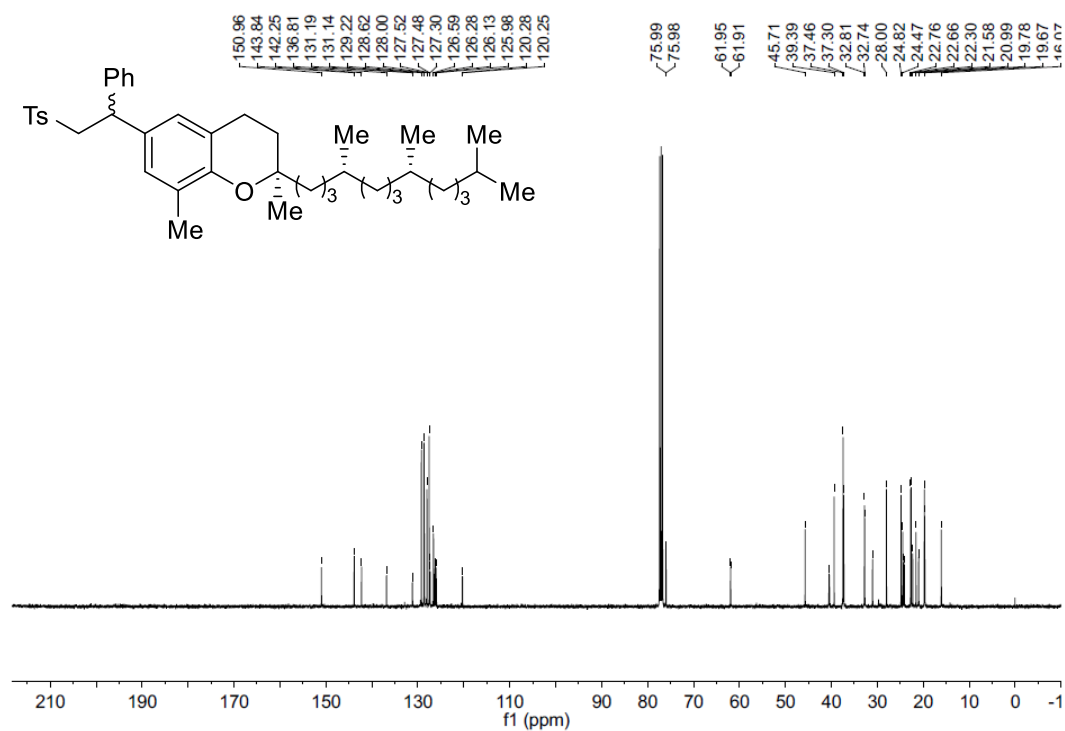



**<sup>1</sup>H NMR (CDCl<sub>3</sub>, 400 MHz) of *S*-methyl dimethylcarbamothioate (11a)**

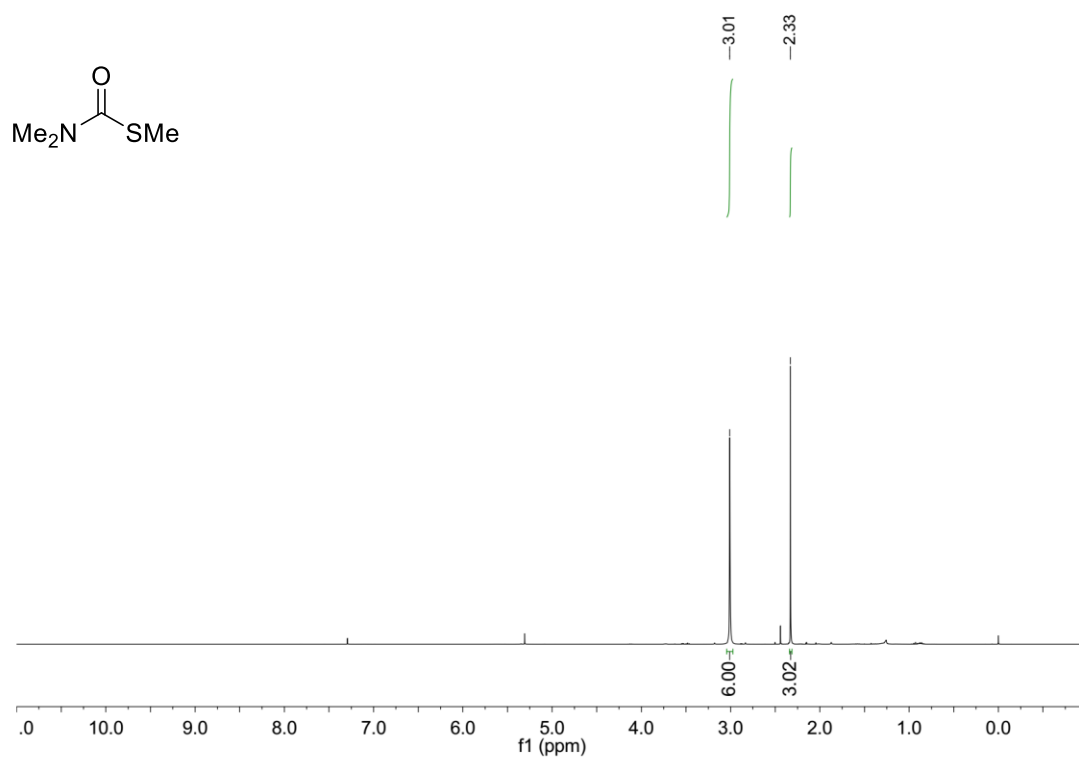

**<sup>13</sup>C NMR (CDCl<sub>3</sub>, 100 MHz) of *S*-methyl dimethylcarbamothioate (11a)**

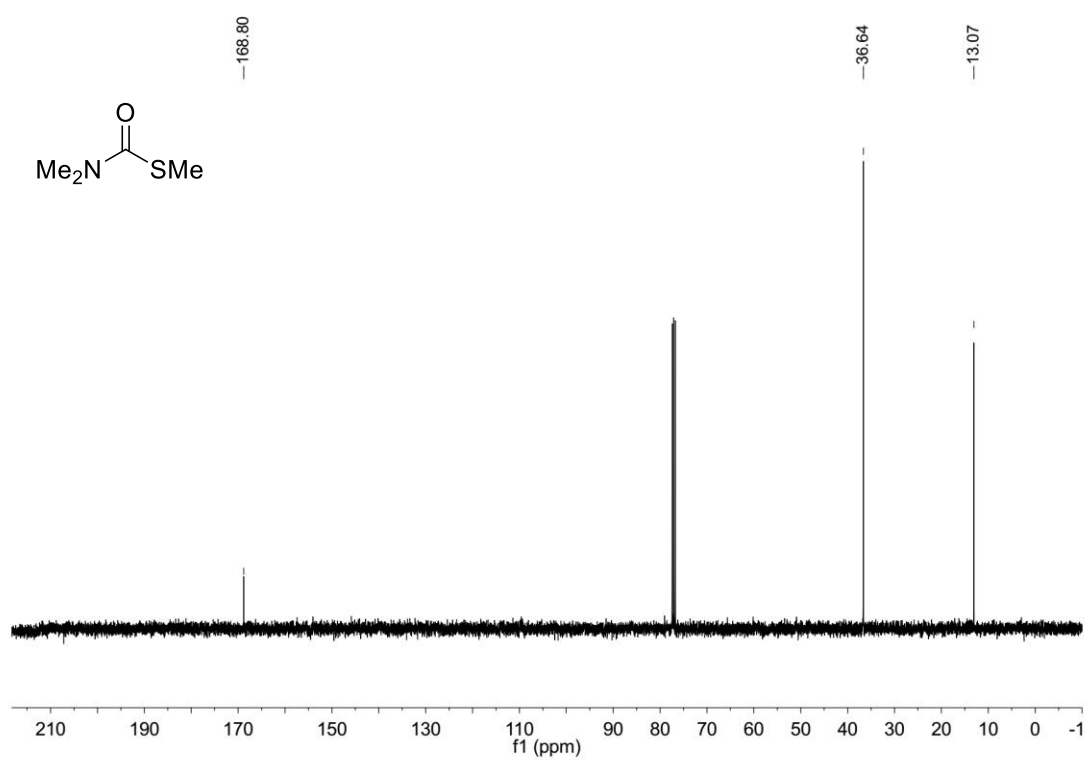

Supplement: Supplementary file 1 [file 21623361]
